# Supplementary material for: Isotopic exchange on the diurnal scale between near-surface snow and lower atmospheric water vapor at Kohnen station, East Antarctica
Source: Copernicus journal article supplement (doi:10.5194/tc-2016-4), 2016-02-22
Supplement: Supplementary file 1 [file tc-2016-4-supplement.zip]

Archive with 6 entries (6 files):
- supplementary_material/data_kohnen.xlsx
- supplementary_material/FigS1.pdf
- supplementary_material/FigS2.pdf
- supplementary_material/FigS3.pdf
- supplementary_material/supp_kohnen_paper.pdf
- supplementary_material/supp_kohnen_paper.tex
