# Supplementary material for: Isotopic exchange on the diurnal scale between near-surface snow and lower atmospheric water vapor at Kohnen station, East Antarctica
Source: Copernicus journal article supplement (doi:10.5194/tc-2016-4), 2016-02-22
Supplement: Supplementary file 1 [file tc-2016-4-supplement.zip › supplementary_material/data_kohnen.xlsx]

## Sheet: Fig.2
top = 3.0 m inlet
bot = 0.2 m inlet
weather = weather observations
T2 = temperature at 2 meters in celcius
q = humidity mixing ratio in ppmv
dD = deuterium in per mille
dx = deuterium excess in per mille
top_time	top_q	top_dD	top_dx			weather_time	weather_T2			ECHAM_time	ECHAM_q	ECHAM_dD	ECHAM_dx	ECHAM_T2			LMD_time	LMD_q	LMD_dD	LMD_dx	LMD_T2
2013-12-16 22:03:00	577.816	-409.6	49.6			2013-12-16 20:00:00	-25.3689			2013-12-16 20:00:00	1077.37	-371.947	19.6779	-23.377			2013-12-16 20:30:00	1293.81	-279.514	7.64022	-21.496
2013-12-16 22:36:00	525.325	-412.1	41.6			2013-12-16 21:00:00	-27.3121			2013-12-16 21:00:00	1042.76	-375.842	20.5863	-24.057			2013-12-16 21:30:00	1270.71	-281.06	7.75946	-22.02
2013-12-16 23:09:00	486.659	-409.3	47.9			2013-12-16 22:00:00	-29.0751			2013-12-16 22:00:00	1000.57	-380.525	20.8862	-24.732			2013-12-16 22:30:00	1248.99	-282.46	7.88349	-22.527
2013-12-16 23:54:00	444.123	-420.4	28.1			2013-12-16 23:00:00	-30.3498			2013-12-16 23:00:00	951.554	-384.714	20.5929	-25.388			2013-12-16 23:30:00	1228.69	-283.727	7.98218	-23.022
2013-12-17 06:33:00	469.816	-427.2	30.1			2013-12-17	-31.5941			2013-12-17	896.498	-388.063	20.3839	-25.991			2013-12-17 00:30:00	1210.13	-284.854	8.03794	-23.468
2013-12-17 07:18:00	517.231	-424.6	26.8			2013-12-17 01:00:00	-32.7623			2013-12-17 01:00:00	839.184	-391.022	20.0139	-26.509			2013-12-17 01:30:00	1193.88	-285.791	8.14625	-23.807
2013-12-17 07:51:00	551.728	-424.5	31.8			2013-12-17 02:00:00	-32.7025			2013-12-17 02:00:00	784.328	-393.513	20.2671	-26.946			2013-12-17 02:30:00	1180.69	-286.469	8.19967	-24.033
2013-12-17 08:25:00	587.519	-421.2	35.6			2013-12-17 03:00:00	-32.5952			2013-12-17 03:00:00	737.485	-395.677	20.3718	-27.216			2013-12-17 03:30:00	1170.93	-286.859	8.26976	-24.149
2013-12-17 09:10:00	659.109	-409.7	44.5			2013-12-17 04:00:00	-32.2315			2013-12-17 04:00:00	702.308	-397.268	20.2218	-27.369			2013-12-17 04:30:00	1164.97	-286.926	8.29496	-24.126
2013-12-17 09:43:00	723.275	-409.1	25.5			2013-12-17 05:00:00	-31.4833			2013-12-17 05:00:00	681.89	-395.521	20.048	-27.318			2013-12-17 05:30:00	1163.23	-286.639	8.31867	-23.911
2013-12-17 10:16:00	795.016	-411.6	30.5			2013-12-17 06:00:00	-30.4646			2013-12-17 06:00:00	676.135	-392.305	19.2664	-27.118			2013-12-17 06:30:00	1166.43	-285.948	8.33181	-23.478
2013-12-17 11:01:00	830.206	-411.3	43.6			2013-12-17 07:00:00	-29.1851			2013-12-17 07:00:00	684.089	-389.966	18.4799	-26.718			2013-12-17 07:30:00	1175.51	-284.806	8.33494	-22.773
2013-12-17 11:34:00	862.543	-405.2	47.7			2013-12-17 08:00:00	-28.0589			2013-12-17 08:00:00	703.39	-388.107	17.385	-26.183			2013-12-17 08:30:00	1192	-283.136	8.31897	-21.882
2013-12-17 12:07:00	890.884	-407.9	38.5			2013-12-17 09:00:00	-26.933			2013-12-17 09:00:00	730.386	-386.504	16.1907	-25.537			2013-12-17 09:30:00	1218.66	-280.881	8.29088	-20.997
2013-12-17 12:52:00	930.596	-409	32.8			2013-12-17 10:00:00	-25.2098			2013-12-17 10:00:00	760.351	-385.159	15.1389	-24.827			2013-12-17 10:30:00	1259.28	-277.937	8.29411	-20.23
2013-12-17 13:25:00	945.499	-409.8	33.1			2013-12-17 11:00:00	-24.2823			2013-12-17 11:00:00	789.717	-384.06	13.4126	-24.159			2013-12-17 11:30:00	1322.64	-274.048	8.22133	-19.702
2013-12-17 13:58:00	986.697	-401	34.6			2013-12-17 12:00:00	-23.5346			2013-12-17 12:00:00	814.352	-383.24	11.9214	-23.542			2013-12-17 12:30:00	1401.23	-269.653	8.17877	-19.371
2013-12-17 14:43:00	1012.03	-398.9	25.6			2013-12-17 13:00:00	-23.138			2013-12-17 13:00:00	833.054	-383.155	11.8957	-23.063			2013-12-17 13:30:00	1465.7	-265.563	8.03878	-19.116
2013-12-17 15:16:00	1042.69	-398.8	24.1			2013-12-17 14:00:00	-22.7561			2013-12-17 14:00:00	844.274	-384.288	12.8762	-22.699			2013-12-17 14:30:00	1532.04	-261.821	7.91339	-18.966
2013-12-17 15:49:00	1048.94	-398.2	27.2			2013-12-17 15:00:00	-22.4564			2013-12-17 15:00:00	855.162	-385.784	14.0135	-22.531			2013-12-17 15:30:00	1567.79	-259.441	7.77179	-18.943
2013-12-17 16:34:00	1079.35	-395.7	33.2			2013-12-17 16:00:00	-22.2362			2013-12-17 16:00:00	876.838	-386.193	14.9957	-22.526			2013-12-17 16:30:00	1590.67	-257.511	7.62031	-19.204
2013-12-17 17:07:00	1094.21	-398.8	34.1			2013-12-17 17:00:00	-22.1893			2013-12-17 17:00:00	901.903	-386.409	15.5807	-22.75			2013-12-17 17:30:00	1600.49	-256.231	7.48861	-19.763
2013-12-17 17:40:00	1070.62	-402.8	25			2013-12-17 18:00:00	-22.0495			2013-12-17 18:00:00	921.921	-386.773	16.0727	-23.127			2013-12-17 18:30:00	1601.64	-255.461	7.35404	-20.525
2013-12-17 18:25:00	1024.88	-400.2	34.9			2013-12-17 19:00:00	-22.1277			2013-12-17 19:00:00	936.23	-387.558	16.6017	-23.679			2013-12-17 19:30:00	1595.18	-255.18	7.18906	-21.151
2013-12-17 18:58:00	993.393	-395.8	36			2013-12-17 20:00:00	-24.0584			2013-12-17 20:00:00	946.691	-389.175	17.1031	-24.305			2013-12-17 20:30:00	1580.83	-255.459	7.05393	-21.377
2013-12-17 19:31:00	979.26	-395.2	37.9			2013-12-17 21:00:00	-27.8646			2013-12-17 21:00:00	954.548	-391.728	17.5986	-24.992			2013-12-17 21:30:00	1561.2	-256.162	6.92926	-21.079
2013-12-17 20:27:00	927.517	-399.1	37.2			2013-12-17 22:00:00	-30.3995			2013-12-17 22:00:00	963.327	-394.98	18.1985	-25.671			2013-12-17 22:30:00	1538.88	-257.12	6.83894	-21.112
2013-12-17 21:00:00	767.076	-399.4	31.1			2013-12-17 23:00:00	-31.0026			2013-12-17 23:00:00	965.139	-399.199	19.8353	-26.262			2013-12-17 23:30:00	1515.02	-258.273	6.75722	-21.303
2013-12-17 21:33:00	591.619	-401.6	34.8			2013-12-18	-27.8487			2013-12-18	964.806	-403.827	20.7819	-26.775			2013-12-18 00:30:00	1490.19	-259.616	6.71477	-21.793
2013-12-17 22:18:00	546.37	-403	42.3			2013-12-18 01:00:00	-26.3049			2013-12-18 01:00:00	961.767	-408.878	22.1395	-27.086			2013-12-18 01:30:00	1465.4	-261.079	6.68815	-22.658
2013-12-17 22:51:00	522.066	-403.6	51.3			2013-12-18 02:00:00	-28.3433			2013-12-18 02:00:00	953.083	-414.321	24.2114	-27.304			2013-12-18 02:30:00	1441.51	-262.551	6.67959	-23.432
2013-12-17 23:24:00	563.135	-405.3	62.6			2013-12-18 03:00:00	-28.2867			2013-12-18 03:00:00	935.869	-419.942	26.3442	-27.343			2013-12-18 03:30:00	1420.26	-263.818	6.69485	-24.072
2013-12-18 00:09:00	805.748	-404.8	32.2			2013-12-18 04:00:00	-26.8852			2013-12-18 04:00:00	908.907	-425.512	28.3052	-27.302			2013-12-18 04:30:00	1403.1	-264.693	6.71237	-24.336
2013-12-18 00:42:00	884.589	-404.3	36.8			2013-12-18 05:00:00	-25.9811			2013-12-18 05:00:00	872.463	-430.738	30.0441	-27.06			2013-12-18 05:30:00	1391.25	-265.064	6.71168	-24.17
2013-12-18 01:15:00	695.073	-419.7	43.8			2013-12-18 06:00:00	-25.0669			2013-12-18 06:00:00	831.33	-434.869	31.4564	-26.768			2013-12-18 06:30:00	1383.91	-264.991	6.75846	-23.5
2013-12-18 02:00:00	572.218	-407.5	51.6			2013-12-18 07:00:00	-23.2597			2013-12-18 07:00:00	797.842	-435.575	31.9793	-26.334			2013-12-18 07:30:00	1380.8	-264.51	6.76311	-22.603
2013-12-18 02:33:00	577.341	-416.6	38.9			2013-12-18 08:00:00	-22.3692			2013-12-18 08:00:00	784.073	-431.567	31.5202	-25.871			2013-12-18 08:30:00	1385.53	-263.393	6.7552	-21.669
2013-12-18 03:06:00	600.508	-414.4	48.6			2013-12-18 09:00:00	-22.1733			2013-12-18 09:00:00	798.56	-423.046	29.8272	-25.285			2013-12-18 09:30:00	1401.99	-261.443	6.80437	-20.81
2013-12-18 03:51:00	636.826	-410.3	54.8			2013-12-18 10:00:00	-21.7854			2013-12-18 10:00:00	835.785	-413.804	28.0898	-24.632			2013-12-18 10:30:00	1435.02	-258.406	6.76927	-20.131
2013-12-18 04:24:00	679.2	-414.2	45.8			2013-12-18 11:00:00	-21.5848			2013-12-18 11:00:00	886.358	-406.491	26.6391	-23.919			2013-12-18 11:30:00	1482.5	-255.032	6.78144	-19.61
2013-12-18 04:57:00	737.273	-404.5	39.7			2013-12-18 12:00:00	-21.2864			2013-12-18 12:00:00	940.688	-400.112	26.3098	-23.221			2013-12-18 12:30:00	1524.96	-252.655	6.72838	-19.165
2013-12-18 05:42:00	755.464	-408.7	34.1			2013-12-18 13:00:00	-21.1307			2013-12-18 13:00:00	983.355	-396.25	24.7017	-22.703			2013-12-18 13:30:00	1556.79	-251.045	6.68781	-18.806
2013-12-18 06:15:00	797.058	-401.3	26.9			2013-12-18 14:00:00	-20.8548			2013-12-18 14:00:00	1013.99	-393.673	22.5921	-22.303			2013-12-18 14:30:00	1594.98	-249.42	6.62832	-18.595
2013-12-18 06:48:00	881.655	-394	27.9			2013-12-18 15:00:00	-20.7838			2013-12-18 15:00:00	1029.83	-390.895	20.9586	-22.109			2013-12-18 15:30:00	1627.37	-247.805	6.56982	-18.537
2013-12-18 07:33:00	958.537	-389.8	26.5			2013-12-18 16:00:00	-20.0462			2013-12-18 16:00:00	1044.94	-385.64	20.153	-22.06			2013-12-18 16:30:00	1651.78	-246.396	6.51105	-18.666
2013-12-18 08:06:00	970.87	-391	33.2			2013-12-18 17:00:00	-19.549			2013-12-18 17:00:00	1054.2	-379.198	17.2998	-22.245			2013-12-18 17:30:00	1660.09	-245.996	6.4461	-18.987
2013-12-18 08:39:00	1002.59	-389.8	24.2			2013-12-18 18:00:00	-19.4164			2013-12-18 18:00:00	1061.59	-372.634	16.4254	-22.546			2013-12-18 18:30:00	1651.08	-246.569	6.31923	-19.409
2013-12-18 09:24:00	1037	-387.3	31.6			2013-12-18 19:00:00	-19.6384			2013-12-18 19:00:00	1064.9	-368.051	15.7007	-23.019			2013-12-18 19:30:00	1634.75	-247.436	6.27797	-19.866
2013-12-18 09:57:00	1069.3	-380.2	31.7			2013-12-18 20:00:00	-19.6293			2013-12-18 20:00:00	1063.41	-365.515	15.1164	-23.539			2013-12-18 20:30:00	1612.75	-248.494	6.16487	-20.309
2013-12-18 10:30:00	1054.87	-388.9	24.9			2013-12-18 21:00:00	-20.0249			2013-12-18 21:00:00	1058.19	-365.76	14.5811	-24.09			2013-12-18 21:30:00	1585.8	-249.756	6.02589	-20.711
2013-12-18 11:15:00	1112.46	-380.8	29.3			2013-12-18 22:00:00	-20.8293			2013-12-18 22:00:00	1050.69	-368.013	15.6552	-24.638			2013-12-18 22:30:00	1556.41	-251.086	5.92937	-21.065
2013-12-18 11:48:00	1102.54	-383.8	26.8			2013-12-18 23:00:00	-21.241			2013-12-18 23:00:00	1043.84	-370.886	16.2477	-25.091			2013-12-18 23:30:00	1525.45	-252.485	5.81153	-21.368
2013-12-18 12:21:00	1113.13	-383	32.2			2013-12-19	-21.302			2013-12-19	1035.25	-379.47	17.1367	-25.511			2013-12-19 00:30:00	1494.38	-253.902	5.72892	-21.613
2013-12-18 13:06:00	1140.68	-379.1	31.7			2013-12-19 01:00:00	-20.8874			2013-12-19 01:00:00	1016.92	-395.411	22.017	-25.767			2013-12-19 01:30:00	1465.62	-255.218	5.67078	-21.802
2013-12-18 13:39:00	1083.45	-381	31.3			2013-12-19 02:00:00	-20.7987			2013-12-19 02:00:00	984.329	-411.219	27.5554	-25.969			2013-12-19 02:30:00	1439.27	-256.47	5.64256	-21.928
2013-12-18 14:12:00	1080.02	-381.6	26.6			2013-12-19 03:00:00	-20.8615			2013-12-19 03:00:00	946.194	-423.018	30.4303	-25.947			2013-12-19 03:30:00	1415.83	-257.644	5.63246	-21.954
2013-12-18 14:57:00	1118.6	-376.5	27			2013-12-19 04:00:00	-20.8911			2013-12-19 04:00:00	914.718	-430.56	30.1615	-25.899			2013-12-19 04:30:00	1396.06	-258.743	5.67445	-21.831
2013-12-18 15:30:00	1095.65	-363.3	21.4			2013-12-19 05:00:00	-21.0338			2013-12-19 05:00:00	978.281	-423.086	27.8792	-25.55			2013-12-19 05:30:00	1378.03	-259.792	5.79	-21.55
2013-12-18 16:03:00	1245.56	-361.4	23			2013-12-19 06:00:00	-21.1016			2013-12-19 06:00:00	947.114	-430.251	29.3066	-25.179			2013-12-19 06:30:00	1365.04	-260.597	5.91183	-21.133
2013-12-18 16:48:00	1382	-356.7	21.9			2013-12-19 07:00:00	-21.22			2013-12-19 07:00:00	942.144	-429.646	27.9281	-24.621			2013-12-19 07:30:00	1362.86	-260.81	6.02616	-20.625
2013-12-18 17:21:00	1545.56	-360.2	20.8			2013-12-19 08:00:00	-21.008			2013-12-19 08:00:00	963.668	-420.456	24.8268	-24.014			2013-12-19 08:30:00	1375.17	-260.452	6.21021	-20.077
2013-12-18 17:54:00	1571.3	-360.7	22.8			2013-12-19 09:00:00	-20.4133			2013-12-19 09:00:00	976.183	-411.732	22.9452	-23.356			2013-12-19 09:30:00	1405.33	-260.063	6.4804	-19.545
2013-12-18 18:39:00	1558.04	-360.6	17.8			2013-12-19 10:00:00	-19.7684			2013-12-19 10:00:00	989.227	-408.173	22.3588	-22.676			2013-12-19 10:30:00	1444.14	-259.461	6.71762	-19.036
2013-12-18 19:12:00	1549.88	-361.2	23.5			2013-12-19 11:00:00	-19.1969			2013-12-19 11:00:00	1019.96	-409.074	23.0506	-22.067			2013-12-19 11:30:00	1491.85	-258.552	6.9287	-18.578
2013-12-18 20:40:00	1542.72	-360.2	35.2			2013-12-19 12:00:00	-18.5926			2013-12-19 12:00:00	1059.54	-408.085	22.5048	-21.498			2013-12-19 12:30:00	1542.59	-257.239	7.142	-18.186
2013-12-18 21:13:00	1474.76	-367.4	33.3			2013-12-19 13:00:00	-18.4954			2013-12-19 13:00:00	1091.31	-405.593	21.6388	-21.069			2013-12-19 13:30:00	1594.98	-256.019	7.29959	-17.898
2013-12-18 21:46:00	1421.95	-372.9	36			2013-12-19 14:00:00	-18.4741			2013-12-19 14:00:00	1109.88	-402.607	20.6728	-20.71			2013-12-19 14:30:00	1640.03	-254.906	7.38476	-17.71
2013-12-18 22:31:00	1375.33	-369.6	32.1			2013-12-19 15:00:00	-18.2552			2013-12-19 15:00:00	1125.38	-400.451	20.0409	-20.548			2013-12-19 15:30:00	1670.17	-254.097	7.49018	-17.668
2013-12-18 23:04:00	1327.68	-372.5	26.1			2013-12-19 16:00:00	-18.2213			2013-12-19 16:00:00	1136.98	-399.243	19.6009	-20.525			2013-12-19 16:30:00	1687.16	-253.61	7.57237	-17.852
2013-12-18 23:37:00	1297.67	-374.6	24.3			2013-12-19 17:00:00	-18.1248			2013-12-19 17:00:00	1136.28	-398.906	19.3996	-20.748			2013-12-19 17:30:00	1682.37	-253.756	7.65194	-18.265
2013-12-19 00:22:00	1336.62	-381	24			2013-12-19 18:00:00	-18.9159			2013-12-19 18:00:00	1128.41	-399.124	19.3807	-21.109			2013-12-19 18:30:00	1663.96	-254.536	7.64279	-18.829
2013-12-19 00:55:00	1377.12	-387	27.5			2013-12-19 19:00:00	-20.0097			2013-12-19 19:00:00	1114.31	-399.694	19.6212	-21.65			2013-12-19 19:30:00	1638.73	-255.556	7.63305	-19.479
2013-12-19 01:28:00	1412.11	-385.4	24.9			2013-12-19 20:00:00	-21.9385			2013-12-19 20:00:00	1094.73	-400.791	20.3803	-22.26			2013-12-19 20:30:00	1610.01	-256.619	7.68399	-20.165
2013-12-19 02:13:00	1430.97	-383.5	27.4			2013-12-19 21:00:00	-23.7603			2013-12-19 21:00:00	1070.4	-402.472	21.5088	-22.934			2013-12-19 21:30:00	1578.51	-257.78	7.66209	-20.841
2013-12-19 02:46:00	1402.41	-383	32.4			2013-12-19 22:00:00	-25.4366			2013-12-19 22:00:00	1042.4	-404.598	22.692	-23.592			2013-12-19 22:30:00	1544.18	-259.103	7.66675	-21.468
2013-12-19 03:19:00	1401.93	-381.1	26.4			2013-12-19 23:00:00	-26.748			2013-12-19 23:00:00	1011.6	-407.259	23.7303	-24.183			2013-12-19 23:30:00	1508.08	-260.585	7.70131	-22.009
2013-12-19 04:04:00	1428.68	-378.4	26.7			2013-12-20	-27.2695			2013-12-20	979.045	-410.584	24.2097	-24.707			2013-12-20 00:30:00	1469.27	-262.302	7.70051	-22.445
2013-12-19 04:37:00	1382.71	-382.1	29.4			2013-12-20 01:00:00	-27.8143			2013-12-20 01:00:00	945.758	-414.425	24.326	-25.111			2013-12-20 01:30:00	1428.24	-264.325	7.74508	-22.752
2013-12-19 05:10:00	1431.45	-383.9	26.5			2013-12-20 02:00:00	-28.6248			2013-12-20 02:00:00	912.575	-418.228	24.2973	-25.449			2013-12-20 02:30:00	1386.09	-266.706	7.86757	-22.879
2013-12-19 05:55:00	1412.83	-387.7	18.4			2013-12-20 03:00:00	-29.269			2013-12-20 03:00:00	882.162	-420.589	24.499	-25.618			2013-12-20 03:30:00	1345.26	-269.25	7.95237	-22.81
2013-12-19 06:28:00	1406.84	-387	25.1			2013-12-20 04:00:00	-28.997			2013-12-20 04:00:00	857.382	-420.443	24.8997	-25.691			2013-12-20 04:30:00	1308.11	-271.766	8.1013	-22.54
2013-12-19 07:01:00	1391.77	-385.6	24.5			2013-12-20 05:00:00	-28.3838			2013-12-20 05:00:00	841.699	-417.352	24.6757	-25.582			2013-12-20 05:30:00	1276.2	-274.13	8.26851	-22.082
2013-12-19 07:46:00	1407.79	-382.9	22.2			2013-12-20 06:00:00	-27.5477			2013-12-20 06:00:00	836.867	-412.888	22.7162	-25.356			2013-12-20 06:30:00	1251.75	-276.145	8.44652	-21.456
2013-12-19 08:19:00	1462.62	-382.1	16.2			2013-12-20 07:00:00	-26.2536			2013-12-20 07:00:00	842.031	-408.128	19.1536	-24.967			2013-12-20 07:30:00	1238.93	-277.627	8.58389	-20.716
2013-12-19 08:52:00	1598.55	-375.7	20.5			2013-12-20 08:00:00	-25.0479			2013-12-20 08:00:00	855.838	-403.305	16.7717	-24.491			2013-12-20 08:30:00	1243.48	-278.613	8.79931	-19.961
2013-12-19 09:37:00	1656.29	-372.5	23.3			2013-12-20 09:00:00	-24.097			2013-12-20 09:00:00	878.563	-398.848	13.9725	-23.944			2013-12-20 09:30:00	1270.46	-278.731	8.98713	-19.273
2013-12-19 10:10:00	1672.73	-371.5	22			2013-12-20 10:00:00	-23.6841			2013-12-20 10:00:00	911.317	-396.471	15.7291	-23.369			2013-12-20 10:30:00	1321.09	-277.814	9.22005	-18.693
2013-12-19 10:43:00	1688.34	-371.9	20.5			2013-12-20 11:00:00	-23.1366			2013-12-20 11:00:00	949.043	-396.862	17.3329	-22.795			2013-12-20 11:30:00	1386.85	-276.285	9.33795	-18.221
2013-12-19 11:28:00	1724.94	-371	21.9			2013-12-20 12:00:00	-22.6121			2013-12-20 12:00:00	989.382	-396.565	18.6487	-22.234			2013-12-20 12:30:00	1425.89	-275.587	9.4727	-17.824
2013-12-19 12:01:00	1774.85	-372.1	19.3			2013-12-20 13:00:00	-21.863			2013-12-20 13:00:00	1022.9	-394.719	19.5352	-21.793			2013-12-20 13:30:00	1471.25	-274.564	9.54706	-17.535
2013-12-19 12:34:00	1738.14	-372.4	19.1			2013-12-20 14:00:00	-21.3139			2013-12-20 14:00:00	1044.7	-391.357	19.2624	-21.454			2013-12-20 14:30:00	1512.57	-273.53	9.59184	-17.362
2013-12-19 13:19:00	1640.16	-374.6	21.9			2013-12-20 15:00:00	-20.8208			2013-12-20 15:00:00	1055	-387.717	18.2068	-21.308			2013-12-20 15:30:00	1549.47	-272.54	9.60066	-17.35
2013-12-19 13:52:00	1624.83	-376.2	22.6			2013-12-20 16:00:00	-20.4851			2013-12-20 16:00:00	1056.86	-384.532	16.9054	-21.298			2013-12-20 16:30:00	1569.25	-271.926	9.57556	-17.524
2013-12-19 14:25:00	1597.93	-379.5	22.8			2013-12-20 17:00:00	-20.4328			2013-12-20 17:00:00	1050.64	-383.044	16.0349	-21.488			2013-12-20 17:30:00	1556.31	-272.061	9.54279	-17.875
2013-12-19 15:10:00	1617.31	-377.5	20.9			2013-12-20 18:00:00	-20.89			2013-12-20 18:00:00	1045.86	-383.136	15.2508	-21.782			2013-12-20 18:30:00	1531.38	-272.449	9.45662	-18.387
2013-12-19 15:43:00	1672.35	-379.2	21.4			2013-12-20 19:00:00	-21.8593			2013-12-20 19:00:00	1037.43	-384.297	14.4186	-22.233			2013-12-20 19:30:00	1499.91	-272.961	9.33259	-19.005
2013-12-19 16:16:00	1571.92	-382.5	21.3			2013-12-20 20:00:00	-23.2326			2013-12-20 20:00:00	1023.62	-385.846	13.6866	-22.759			2013-12-20 20:30:00	1464.81	-273.766	9.1778	-19.67
2013-12-19 17:01:00	1575.65	-385	23.3			2013-12-20 21:00:00	-24.4992			2013-12-20 21:00:00	1006.93	-388.458	13.3593	-23.333			2013-12-20 21:30:00	1427.56	-274.887	9.04492	-20.325
2013-12-19 17:34:00	1585.72	-390.8	27.4			2013-12-20 22:00:00	-25.5403			2013-12-20 22:00:00	987.956	-391.449	13.5992	-23.899			2013-12-20 22:30:00	1387.97	-276.24	8.8642	-20.923
2013-12-19 18:07:00	1534.71	-390.9	24.4			2013-12-20 23:00:00	-25.8436			2013-12-20 23:00:00	969.199	-393.04	14.6439	-24.408			2013-12-20 23:30:00	1346.85	-277.77	8.65668	-21.431
2013-12-19 18:52:00	1440.49	-393.4	25.3			2013-12-21	-26.2502			2013-12-21	950.438	-391.959	16.9381	-24.853			2013-12-21 00:30:00	1305.74	-279.393	8.43792	-21.832
2013-12-19 19:25:00	1311.48	-400.1	27.3			2013-12-21 01:00:00	-27.7282			2013-12-21 01:00:00	943.894	-386.392	19.653	-25.192			2013-12-21 01:30:00	1265.67	-281.05	8.25792	-22.118
2013-12-19 20:06:00	1166.28	-400.4	32.5			2013-12-21 02:00:00	-28.083			2013-12-21 02:00:00	933.985	-381.078	21.9655	-25.434			2013-12-21 02:30:00	1227.87	-282.649	8.03775	-22.271
2013-12-19 20:51:00	1045.43	-402.1	22.7			2013-12-21 03:00:00	-27.5813			2013-12-21 03:00:00	972.156	-370.983	22.234	-25.508			2013-12-21 03:30:00	1193.95	-284.067	7.85138	-22.267
2013-12-19 21:24:00	908.255	-404.6	25.5			2013-12-21 04:00:00	-27.059			2013-12-21 04:00:00	956.288	-376.047	22.02	-25.483			2013-12-21 04:30:00	1166.33	-285.108	7.66481	-22.094
2013-12-19 21:57:00	851.729	-403.7	32.4			2013-12-21 05:00:00	-26.4567			2013-12-21 05:00:00	922.814	-388.998	25.3052	-25.209			2013-12-21 05:30:00	1147.9	-285.531	7.44361	-21.763
2013-12-19 22:42:00	775.686	-410.1	27.8			2013-12-21 06:00:00	-24.6982			2013-12-21 06:00:00	904.233	-397.387	28.0879	-24.859			2013-12-21 06:30:00	1141.82	-285.397	7.27035	-21.31
2013-12-19 23:15:00	725.071	-414	25.7			2013-12-21 07:00:00	-23.6525			2013-12-21 07:00:00	891.365	-400.996	27.9852	-24.375			2013-12-21 07:30:00	1151.84	-284.688	7.14337	-20.787
2013-12-19 23:48:00	691.812	-411.4	40.1			2013-12-21 08:00:00	-22.3567			2013-12-21 08:00:00	900.274	-402.269	26.8851	-23.818			2013-12-21 08:30:00	1181.03	-283.157	7.05747	-20.246
2013-12-20 00:33:00	644.105	-416.2	44.6			2013-12-21 09:00:00	-21.1659			2013-12-21 09:00:00	920.022	-402.967	25.6235	-23.256			2013-12-21 09:30:00	1230.98	-280.829	7.04688	-19.734
2013-12-20 01:06:00	607.793	-418	38.8			2013-12-21 10:00:00	-20.1484			2013-12-21 10:00:00	944.759	-402.949	24.3372	-22.664			2013-12-21 10:30:00	1282.11	-278.519	6.9843	-19.253
2013-12-20 01:39:00	571.65	-417.1	47			2013-12-21 11:00:00	-19.571			2013-12-21 11:00:00	972.196	-402.012	23.3215	-22.071			2013-12-21 11:30:00	1340.86	-276.009	6.95526	-18.815
2013-12-20 02:24:00	539.056	-423	35.4			2013-12-21 12:00:00	-19.0736			2013-12-21 12:00:00	1003.89	-401.976	23.2235	-21.51			2013-12-21 12:30:00	1376.34	-274.098	6.84239	-18.416
2013-12-20 02:57:00	529.054	-422.8	20.4			2013-12-21 13:00:00	-18.8756			2013-12-21 13:00:00	1046.36	-402.662	23.483	-21.101			2013-12-21 13:30:00	1423.08	-271.878	6.78461	-18.11
2013-12-20 03:30:00	516.581	-419.4	26.8			2013-12-21 14:00:00	-18.7302			2013-12-21 14:00:00	1093.29	-402.663	23.3283	-20.805			2013-12-21 14:30:00	1468.85	-269.794	6.69552	-17.897
2013-12-20 04:15:00	531.948	-416.9	31.1			2013-12-21 15:00:00	-18.3256			2013-12-21 15:00:00	1138.21	-402.457	24.0528	-20.676			2013-12-21 15:30:00	1499.96	-268.083	6.62628	-17.798
2013-12-20 04:48:00	540.368	-420.3	30.6			2013-12-21 16:00:00	-17.9141			2013-12-21 16:00:00	1183.45	-401.266	22.7785	-20.691			2013-12-21 16:30:00	1520.48	-266.704	6.51337	-17.869
2013-12-20 05:21:00	562.851	-419	36.7			2013-12-21 17:00:00	-18.0707			2013-12-21 17:00:00	1222.02	-396.599	20.1969	-20.896			2013-12-21 17:30:00	1534.67	-265.664	6.43428	-18.159
2013-12-20 06:06:00	602.519	-419.7	38.8			2013-12-21 18:00:00	-18.7223			2013-12-21 18:00:00	1252.37	-389.107	18.9361	-21.221			2013-12-21 18:30:00	1521.36	-265.448	6.32142	-18.621
2013-12-20 06:39:00	650.916	-418.2	39.5			2013-12-21 19:00:00	-19.9389			2013-12-21 19:00:00	1272.98	-381.03	18.0242	-21.7			2013-12-21 19:30:00	1495.71	-265.713	6.17599	-19.193
2013-12-20 07:12:00	702.297	-415.6	33.8			2013-12-21 20:00:00	-21.2613			2013-12-21 20:00:00	1285.05	-373.022	17.8771	-22.226			2013-12-21 20:30:00	1465.78	-266.526	6.03613	-19.809
2013-12-20 07:57:00	754.355	-410.8	30.7			2013-12-21 21:00:00	-22.3621			2013-12-21 21:00:00	1290.1	-367.141	19.1205	-22.802			2013-12-21 21:30:00	1433.09	-267.734	5.93413	-20.398
2013-12-20 08:30:00	797.16	-410.1	30			2013-12-21 22:00:00	-23.5266			2013-12-21 22:00:00	1290.08	-363.161	19.4678	-23.382			2013-12-21 22:30:00	1399.32	-269.144	5.81266	-20.928
2013-12-20 09:03:00	840.433	-409.1	26.2			2013-12-21 23:00:00	-24.2549			2013-12-21 23:00:00	1285.66	-360.925	19.1708	-23.899			2013-12-21 23:30:00	1366.08	-270.663	5.66333	-21.382
2013-12-20 09:48:00	872.242	-412	23.3			2013-12-22	-25.1316			2013-12-22	1272.01	-357.205	14.2953	-24.372			2013-12-22 00:30:00	1333.87	-272.265	5.54786	-21.739
2013-12-20 10:21:00	882.283	-408.6	32.9			2013-12-22 01:00:00	-25.679			2013-12-22 01:00:00	1242.04	-351.167	9.77146	-24.716			2013-12-22 01:30:00	1303.12	-273.921	5.43966	-21.994
2013-12-20 10:54:00	905.723	-404.5	36			2013-12-22 02:00:00	-25.6072			2013-12-22 02:00:00	1196.48	-349.73	12.2701	-24.979			2013-12-22 02:30:00	1275.61	-275.538	5.37974	-22.127
2013-12-20 11:39:00	935.167	-402.7	28.1			2013-12-22 03:00:00	-25.2779			2013-12-22 03:00:00	1145.84	-357.301	18.8504	-25.07			2013-12-22 03:30:00	1248.43	-277.205	5.28796	-22.108
2013-12-20 12:12:00	967.863	-400.3	30.8			2013-12-22 04:00:00	-24.9439			2013-12-22 04:00:00	1097.71	-371.78	26.0894	-25.063			2013-12-22 04:30:00	1224.37	-278.768	5.25689	-21.921
2013-12-20 12:45:00	1028.59	-400.3	28.9			2013-12-22 05:00:00	-24.232			2013-12-22 05:00:00	1054.18	-386.037	30.1725	-24.872			2013-12-22 05:30:00	1206.05	-280.046	5.23849	-21.557
2013-12-20 13:30:00	1104.1	-397	27.2			2013-12-22 06:00:00	-23.6957			2013-12-22 06:00:00	1022.58	-388.332	31.4364	-24.587			2013-12-22 06:30:00	1196.51	-280.906	5.23065	-21.032
2013-12-20 14:03:00	1141.25	-395.6	32.7			2013-12-22 07:00:00	-22.6475			2013-12-22 07:00:00	1013.11	-385.225	24.2651	-24.108			2013-12-22 07:30:00	1200.07	-281.364	5.34568	-20.391
2013-12-20 14:36:00	1178.29	-395.7	29.3			2013-12-22 08:00:00	-21.2031			2013-12-22 08:00:00	1022.8	-378.344	24.6977	-23.548			2013-12-22 08:30:00	1221.36	-281.159	5.46172	-19.713
2013-12-20 15:21:00	1268.46	-394.6	27.6			2013-12-22 09:00:00	-19.8718			2013-12-22 09:00:00	1047.75	-367.87	20.5099	-22.923			2013-12-22 09:30:00	1263.88	-280.155	5.65895	-19.07
2013-12-20 15:54:00	1296.62	-392.2	28.7			2013-12-22 10:00:00	-18.817			2013-12-22 10:00:00	1085.14	-360.49	17.8162	-22.264			2013-12-22 10:30:00	1326.15	-278.487	5.93155	-18.498
2013-12-20 16:27:00	1332.5	-392.3	28.5			2013-12-22 11:00:00	-17.7475			2013-12-22 11:00:00	1127.84	-357.798	15.2366	-21.606			2013-12-22 11:30:00	1400.25	-276.543	6.23337	-18.006
2013-12-20 17:12:00	1337.09	-393.2	26.3			2013-12-22 12:00:00	-16.9479			2013-12-22 12:00:00	1171.75	-358.449	13.0232	-20.992			2013-12-22 12:30:00	1441.4	-275.699	6.36683	-17.571
2013-12-20 17:45:00	1296.62	-395.9	24.8			2013-12-22 13:00:00	-16.3246			2013-12-22 13:00:00	1213.73	-360.565	11.4449	-20.516			2013-12-22 13:30:00	1490.27	-274.6	6.51215	-17.24
2013-12-20 18:18:00	1246.6	-397	29.6			2013-12-22 14:00:00	-15.8785			2013-12-22 14:00:00	1252.57	-362.608	10.6291	-20.16			2013-12-22 14:30:00	1544.59	-273.374	6.6643	-17.036
2013-12-20 19:03:00	1145.52	-400.3	30.6			2013-12-22 15:00:00	-15.5603			2013-12-22 15:00:00	1285.81	-364.118	10.6358	-20.018			2013-12-22 15:30:00	1586.57	-272.534	6.7369	-17.011
2013-12-20 19:36:00	1067.54	-406.2	23.3			2013-12-22 16:00:00	-15.5138			2013-12-22 16:00:00	1313.14	-365.032	11.7216	-20.039			2013-12-22 16:30:00	1583.08	-272.863	6.75811	-17.195
2013-12-20 21:01:00	888.784	-409.5	26.8			2013-12-22 17:00:00	-15.5077			2013-12-22 17:00:00	1332.47	-364.304	14.5703	-20.301			2013-12-22 17:30:00	1561.61	-273.631	6.75805	-17.605
2013-12-20 21:34:00	834.54	-413.1	41.4			2013-12-22 18:00:00	-16.1492			2013-12-22 18:00:00	1344.05	-363.328	17.8642	-20.68			2013-12-22 18:30:00	1532.39	-274.603	6.69359	-18.203
2013-12-20 22:07:00	799.305	-416.6	33.8			2013-12-22 19:00:00	-17.7926			2013-12-22 19:00:00	1348.07	-363.443	19.8596	-21.213			2013-12-22 19:30:00	1498.43	-275.741	6.61285	-18.901
2013-12-20 22:52:00	763.436	-413.7	31			2013-12-22 20:00:00	-18.4543			2013-12-22 20:00:00	1343.74	-364.473	21.5299	-21.786			2013-12-22 20:30:00	1462.69	-277.077	6.54622	-19.621
2013-12-20 23:25:00	760.305	-420.9	26			2013-12-22 21:00:00	-19.5167			2013-12-22 21:00:00	1332.22	-366.505	22.5865	-22.406			2013-12-22 21:30:00	1426.44	-278.642	6.47948	-20.297
2013-12-20 23:58:00	734.869	-420.6	33.9			2013-12-22 22:00:00	-21.0797			2013-12-22 22:00:00	1314.78	-369.799	23.6806	-23.008			2013-12-22 22:30:00	1391.03	-280.288	6.43348	-20.897
2013-12-21 00:43:00	640.318	-422.6	40.5			2013-12-22 23:00:00	-22.4389			2013-12-22 23:00:00	1290.55	-374.06	25.3513	-23.565			2013-12-22 23:30:00	1357.1	-281.962	6.39717	-21.404
2013-12-21 01:16:00	601.561	-425.3	35.5			2013-12-23	-23.5485			2013-12-23	1256.51	-380.04	27.0332	-24.067			2013-12-23 00:30:00	1324.87	-283.646	6.32532	-21.797
2013-12-21 01:49:00	595.535	-422.6	35.4			2013-12-23 01:00:00	-24.7125			2013-12-23 01:00:00	1213.85	-387.392	27.601	-24.456			2013-12-23 01:30:00	1294.79	-285.29	6.27861	-22.056
2013-12-21 02:34:00	613.845	-418.1	31.6			2013-12-23 02:00:00	-25.2415			2013-12-23 02:00:00	1165.66	-395.207	27.9257	-24.775			2013-12-23 02:30:00	1267.7	-286.807	6.26858	-22.178
2013-12-21 03:07:00	637.311	-420.6	37.5			2013-12-23 03:00:00	-25.3984			2013-12-23 03:00:00	1117.55	-402.699	28.4948	-24.921			2013-12-23 03:30:00	1244.27	-288.118	6.21256	-22.147
2013-12-21 03:40:00	644.3	-417.8	37.2			2013-12-23 04:00:00	-25.4518			2013-12-23 04:00:00	1077.09	-409.689	30.7526	-24.971			2013-12-23 04:30:00	1225.25	-289.149	6.17576	-21.936
2013-12-21 04:25:00	675.269	-414.8	37.9			2013-12-23 05:00:00	-24.9718			2013-12-23 05:00:00	1048.16	-416.5	35.4738	-24.827			2013-12-23 05:30:00	1211.9	-289.798	6.17648	-21.533
2013-12-21 04:58:00	680.281	-416.8	38.2			2013-12-23 06:00:00	-24.1423			2013-12-23 06:00:00	1032.6	-423.12	38.6913	-24.574			2013-12-23 06:30:00	1206.19	-289.955	6.1069	-20.963
2013-12-21 05:31:00	757.077	-418.7	24.5			2013-12-23 07:00:00	-22.3962			2013-12-23 07:00:00	1031.01	-428.584	40.9782	-24.159			2013-12-23 07:30:00	1210.29	-289.633	6.13395	-20.278
2013-12-21 06:16:00	858.587	-412.2	19.4			2013-12-23 08:00:00	-20.958			2013-12-23 08:00:00	1042	-431.709	38.8309	-23.662			2013-12-23 08:30:00	1226.09	-288.744	6.19362	-19.528
2013-12-21 06:49:00	890.779	-413.2	34.9			2013-12-23 09:00:00	-19.5654			2013-12-23 09:00:00	1063.53	-431.564	36.4796	-23.076			2013-12-23 09:30:00	1255.01	-287.273	6.24155	-18.789
2013-12-21 07:22:00	934.529	-414.4	25			2013-12-23 10:00:00	-18.6582			2013-12-23 10:00:00	1092.93	-428.275	35.2885	-22.456			2013-12-23 10:30:00	1300.99	-285.08	6.37443	-18.134
2013-12-21 08:07:00	1047.3	-409.1	15.3			2013-12-23 11:00:00	-18.017			2013-12-23 11:00:00	1129.01	-424.959	34.7607	-21.813			2013-12-23 11:30:00	1366.01	-282.178	6.49745	-17.621
2013-12-21 08:40:00	1144.28	-403.7	22.7			2013-12-23 12:00:00	-17.857			2013-12-23 12:00:00	1168.45	-421.858	35.2575	-21.215			2013-12-23 12:30:00	1443.29	-279.038	6.6301	-17.249
2013-12-21 09:13:00	1199.22	-403.6	28.2			2013-12-23 13:00:00	-17.6416			2013-12-23 13:00:00	1204.52	-418.917	35.1724	-20.744			2013-12-23 13:30:00	1505.87	-276.645	6.72203	-16.979
2013-12-21 09:58:00	1287.29	-399.7	32			2013-12-23 14:00:00	-17.3049			2013-12-23 14:00:00	1235.64	-417.894	36.4984	-20.41			2013-12-23 14:30:00	1538.6	-275.371	6.77137	-16.827
2013-12-21 10:31:00	1352.56	-399.2	32			2013-12-23 15:00:00	-17.0182			2013-12-23 15:00:00	1261.26	-418.872	38.555	-20.337			2013-12-23 15:30:00	1531.88	-275.431	6.72336	-16.897
2013-12-21 11:04:00	1392.49	-399.5	30.4			2013-12-23 16:00:00	-16.9454			2013-12-23 16:00:00	1276.82	-419.636	38.7995	-20.441			2013-12-23 16:30:00	1503.97	-276.338	6.70181	-17.267
2013-12-21 11:49:00	1443.87	-396.8	27.8			2013-12-23 17:00:00	-17.1218			2013-12-23 17:00:00	1283.62	-419.818	38.3929	-20.745			2013-12-23 17:30:00	1472.99	-277.5	6.65721	-17.817
2013-12-21 12:22:00	1431.81	-394.6	26.7			2013-12-23 18:00:00	-17.6428			2013-12-23 18:00:00	1287.99	-419.727	37.4879	-21.201			2013-12-23 18:30:00	1444.79	-278.704	6.59974	-18.343
2013-12-21 12:55:00	1483.77	-395.9	25.1			2013-12-23 19:00:00	-18.2198			2013-12-23 19:00:00	1291.2	-419.483	35.9731	-21.869			2013-12-23 19:30:00	1416.98	-280.022	6.60045	-18.784
2013-12-21 13:40:00	1521.31	-396.7	25.6			2013-12-23 20:00:00	-16.537			2013-12-23 20:00:00	1292.6	-418.779	34.2258	-22.47			2013-12-23 20:30:00	1387.76	-281.546	6.60019	-19.231
2013-12-21 14:13:00	1563.24	-397.8	21.5			2013-12-23 21:00:00	-20.8966			2013-12-23 21:00:00	1290.52	-417.219	33.5832	-23.071			2013-12-23 21:30:00	1356.63	-283.342	6.65625	-19.83
2013-12-21 14:46:00	1625.96	-393.9	22.3			2013-12-23 22:00:00	-23.5307			2013-12-23 22:00:00	1283.19	-416.254	33.0287	-23.641			2013-12-23 22:30:00	1323.87	-285.41	6.677	-20.493
2013-12-21 15:31:00	1722.26	-384.6	20.9			2013-12-23 23:00:00	-24.6377			2013-12-23 23:00:00	1270.33	-417.324	33.1087	-24.179			2013-12-23 23:30:00	1290.05	-287.712	6.74486	-21.104
2013-12-21 16:04:00	1705.01	-383.6	19			2013-12-24	-23.6238			2013-12-24	1248.1	-418.71	34.3783	-24.664			2013-12-24 00:30:00	1255.89	-290.198	6.80143	-21.63
2013-12-21 16:37:00	1796.47	-383.1	18.3			2013-12-24 01:00:00	-23.9374			2013-12-24 01:00:00	1214.14	-421.212	36.4196	-25.009			2013-12-24 01:30:00	1222.23	-292.796	6.88911	-22.025
2013-12-21 17:22:00	1704.76	-386.9	19.9			2013-12-24 02:00:00	-25.1487			2013-12-24 02:00:00	1167.14	-425.741	38.7464	-25.271			2013-12-24 02:30:00	1190.27	-295.382	6.95387	-22.269
2013-12-21 17:55:00	1664.76	-387.9	19.5			2013-12-24 03:00:00	-23.0162			2013-12-24 03:00:00	1108.43	-432.847	41.2621	-25.361			2013-12-24 03:30:00	1161.14	-297.82	7.04146	-22.342
2013-12-21 18:28:00	1583.35	-395.4	21.4			2013-12-24 04:00:00	-22.1664			2013-12-24 04:00:00	1043.81	-442.537	43.7517	-25.354			2013-12-24 04:30:00	1135.79	-299.997	7.14217	-22.312
2013-12-21 19:13:00	1443.51	-401.9	24.4			2013-12-24 05:00:00	-23.5221			2013-12-24 05:00:00	984.45	-453.339	45.7798	-25.198			2013-12-24 05:30:00	1115.31	-301.801	7.21993	-21.934
2013-12-21 20:26:00	1221.75	-407.7	26.4			2013-12-24 06:00:00	-24.268			2013-12-24 06:00:00	943.186	-461.73	47.3186	-24.97			2013-12-24 06:30:00	1101.91	-303.088	7.33739	-21.308
2013-12-21 21:11:00	1108.56	-414.4	25.7			2013-12-24 07:00:00	-23.7218			2013-12-24 07:00:00	927.219	-464.014	47.9532	-24.606			2013-12-24 07:30:00	1098.59	-303.659	7.44324	-20.587
2013-12-21 21:44:00	1041.49	-416.1	26.6			2013-12-24 08:00:00	-22.7189			2013-12-24 08:00:00	931.072	-462.604	47.6336	-24.166			2013-12-24 08:30:00	1108.87	-303.268	7.56618	-19.822
2013-12-21 22:17:00	1013.56	-412.3	27.8			2013-12-24 09:00:00	-21.4126			2013-12-24 09:00:00	956.544	-456.452	46.2612	-23.635			2013-12-24 09:30:00	1137.36	-301.676	7.69058	-19.075
2013-12-21 23:02:00	979.69	-412.3	31.9			2013-12-24 10:00:00	-20.7828			2013-12-24 10:00:00	1001.89	-445.922	43.7153	-23.055			2013-12-24 10:30:00	1188.2	-298.755	7.89017	-18.438
2013-12-21 23:35:00	911.211	-420.3	32			2013-12-24 11:00:00	-20.1785			2013-12-24 11:00:00	1057.35	-433.009	41.5541	-22.464			2013-12-24 11:30:00	1262.65	-294.697	8.03082	-17.95
2013-12-22 00:08:00	868.067	-421.1	34.2			2013-12-24 12:00:00	-19.3574			2013-12-24 12:00:00	1116.33	-421.391	39.0504	-21.891			2013-12-24 12:30:00	1346.87	-290.566	8.1792	-17.599
2013-12-22 00:53:00	804.111	-418.6	32.8			2013-12-24 13:00:00	-18.9246			2013-12-24 13:00:00	1169.89	-411.315	35.6368	-21.41			2013-12-24 13:30:00	1381.56	-288.827	8.20487	-17.335
2013-12-22 01:26:00	765.458	-417.7	32.5			2013-12-24 14:00:00	-18.8182			2013-12-24 14:00:00	1214.19	-403.588	34.8422	-21.026			2013-12-24 14:30:00	1418.69	-287.126	8.26384	-17.203
2013-12-22 01:59:00	801.656	-419.1	32.3			2013-12-24 15:00:00	-18.5366			2013-12-24 15:00:00	1244.13	-399.109	33.1015	-20.859			2013-12-24 15:30:00	1456.71	-285.58	8.31714	-17.25
2013-12-22 02:44:00	829.381	-419	33.4			2013-12-24 16:00:00	-18.4398			2013-12-24 16:00:00	1259.44	-396.207	31.9324	-20.852			2013-12-24 16:30:00	1446.89	-285.924	8.33445	-17.522
2013-12-22 03:17:00	793.18	-425.1	34.9			2013-12-24 17:00:00	-18.607			2013-12-24 17:00:00	1260.9	-394.614	31.1171	-21.094			2013-12-24 17:30:00	1421.4	-286.929	8.3089	-18.045
2013-12-22 03:50:00	824.743	-418.1	36.4			2013-12-24 18:00:00	-19.1839			2013-12-24 18:00:00	1252.39	-394.041	30.2315	-21.483			2013-12-24 18:30:00	1390.69	-288.182	8.28297	-18.772
2013-12-22 04:35:00	870.467	-419.3	31.6			2013-12-24 19:00:00	-20.4397			2013-12-24 19:00:00	1236.01	-394.233	29.3665	-22.046			2013-12-24 19:30:00	1358.43	-289.584	8.26097	-19.617
2013-12-22 05:08:00	878.305	-421.8	23.9			2013-12-24 20:00:00	-22.3752			2013-12-24 20:00:00	1213.94	-394.755	28.6507	-22.681			2013-12-24 20:30:00	1326.08	-291.09	8.28026	-20.439
2013-12-22 05:41:00	890.359	-418.4	22.4			2013-12-24 21:00:00	-24.0556			2013-12-24 21:00:00	1187.88	-395.512	28.2756	-23.396			2013-12-24 21:30:00	1293.89	-292.751	8.2952	-21.13
2013-12-22 06:26:00	926.987	-413.7	21.1			2013-12-24 22:00:00	-25.9351			2013-12-24 22:00:00	1158.87	-396.516	28.2538	-24.094			2013-12-24 22:30:00	1261.72	-294.582	8.28414	-21.731
2013-12-22 06:59:00	998.803	-409.2	26.2			2013-12-24 23:00:00	-27.3711			2013-12-24 23:00:00	1127.07	-397.963	28.7621	-24.745			2013-12-24 23:30:00	1229.84	-296.546	8.34284	-22.266
2013-12-22 07:32:00	1084.22	-407.2	20.7			2013-12-25	-28.4605			2013-12-25	1093.72	-400.12	29.2836	-25.342			2013-12-25 00:30:00	1198.75	-298.592	8.32589	-22.705
2013-12-22 08:17:00	1217.74	-402	24.9			2013-12-25 01:00:00	-28.9692			2013-12-25 01:00:00	1059.93	-403.189	30.1475	-25.807			2013-12-25 01:30:00	1169.66	-300.585	8.37153	-23.031
2013-12-22 08:50:00	1322.97	-398.5	21.4			2013-12-25 02:00:00	-29.4746			2013-12-25 02:00:00	1025.69	-407.174	31.0866	-26.175			2013-12-25 02:30:00	1143.95	-302.354	8.38192	-23.2
2013-12-22 09:23:00	1420.51	-396	26.1			2013-12-25 03:00:00	-29.5631			2013-12-25 03:00:00	992.185	-411.622	32.0181	-26.36			2013-12-25 03:30:00	1122.43	-303.789	8.42003	-23.22
2013-12-22 10:08:00	1570.81	-391.2	21.4			2013-12-25 04:00:00	-29.1169			2013-12-25 04:00:00	960.648	-415.981	32.6435	-26.44			2013-12-25 04:30:00	1105.49	-304.825	8.41833	-23.082
2013-12-22 10:41:00	1641.92	-389.6	22.2			2013-12-25 05:00:00	-28.382			2013-12-25 05:00:00	933.027	-419.688	32.868	-26.308			2013-12-25 05:30:00	1093.76	-305.381	8.36794	-22.788
2013-12-22 11:14:00	1746.88	-388.6	23.7			2013-12-25 06:00:00	-27.247			2013-12-25 06:00:00	910.449	-422.412	32.7474	-26.049			2013-12-25 06:30:00	1087.74	-305.408	8.3303	-22.323
2013-12-22 11:59:00	1885.33	-387	23.9			2013-12-25 07:00:00	-25.891			2013-12-25 07:00:00	894.141	-423.79	32.1473	-25.617			2013-12-25 07:30:00	1087.69	-304.937	8.28423	-21.689
2013-12-22 12:32:00	1944.5	-386.1	20.5			2013-12-25 08:00:00	-24.4692			2013-12-25 08:00:00	885.04	-423.54	31.6581	-25.103			2013-12-25 08:30:00	1093.75	-303.997	8.22607	-20.899
2013-12-22 13:05:00	2009.03	-385.9	21.8			2013-12-25 09:00:00	-22.8889			2013-12-25 09:00:00	884.271	-422.086	31.1337	-24.498			2013-12-25 09:30:00	1106.95	-302.548	8.23099	-20.044
2013-12-22 13:50:00	2113.88	-384.6	23			2013-12-25 10:00:00	-21.5072			2013-12-25 10:00:00	891.711	-420.002	30.9505	-23.87			2013-12-25 10:30:00	1129.4	-300.486	8.17018	-19.251
2013-12-22 14:23:00	2210.01	-384.7	22.6			2013-12-25 11:00:00	-20.2621			2013-12-25 11:00:00	909.667	-417.425	30.5475	-23.257			2013-12-25 11:30:00	1170.02	-297.317	8.14587	-18.63
2013-12-22 14:56:00	2312.37	-384.4	23.7			2013-12-25 12:00:00	-19.2105			2013-12-25 12:00:00	935.028	-414.588	29.9222	-22.689			2013-12-25 12:30:00	1249.75	-292.203	8.19073	-18.285
2013-12-22 15:41:00	2309.96	-384.2	24.5			2013-12-25 13:00:00	-18.5675			2013-12-25 13:00:00	958.555	-412.175	29.3509	-22.208			2013-12-25 13:30:00	1317.97	-288.182	8.19347	-18.038
2013-12-22 16:14:00	2300.46	-385.1	22			2013-12-25 14:00:00	-18.2013			2013-12-25 14:00:00	979.478	-410.148	28.8463	-21.819			2013-12-25 14:30:00	1365.84	-285.327	8.1815	-17.872
2013-12-22 16:47:00	2302.44	-385.4	21.9			2013-12-25 15:00:00	-17.7397			2013-12-25 15:00:00	994.835	-408.618	28.533	-21.621			2013-12-25 15:30:00	1383.32	-283.835	8.11453	-17.867
2013-12-22 17:32:00	2289.13	-384.8	23.3			2013-12-25 16:00:00	-17.2956			2013-12-25 16:00:00	1005.51	-407.324	28.3835	-21.609			2013-12-25 16:30:00	1365.77	-283.755	7.99866	-18.089
2013-12-22 18:05:00	2166.47	-391.5	20.9			2013-12-25 17:00:00	-17.2351			2013-12-25 17:00:00	1016.82	-405.918	28.1965	-21.777			2013-12-25 17:30:00	1357.24	-283.295	7.90796	-17.835
2013-12-22 18:38:00	1965.89	-396.2	23			2013-12-25 18:00:00	-17.3526			2013-12-25 18:00:00	1031.18	-404.321	28.0404	-22.052			2013-12-25 18:30:00	1354.29	-282.581	7.8051	-17.783
2013-12-22 19:23:00	1813.24	-400.9	21.4			2013-12-25 19:00:00	-17.9503			2013-12-25 19:00:00	1047.84	-402.732	28.004	-22.472			2013-12-25 19:30:00	1354.49	-281.67	7.71811	-18.231
2013-12-22 20:04:00	1799.72	-400.4	19.1			2013-12-25 20:00:00	-17.0449			2013-12-25 20:00:00	1065.1	-401.396	27.9569	-22.977			2013-12-25 20:30:00	1357.23	-280.577	7.60576	-18.381
2013-12-22 20:37:00	1682.62	-405.6	20.8			2013-12-25 21:00:00	-19.8003			2013-12-25 21:00:00	1081.74	-400.334	27.9875	-23.587			2013-12-25 21:30:00	1361.73	-279.389	7.50466	-18.557
2013-12-22 21:22:00	1594.31	-408.3	20			2013-12-25 22:00:00	-22.7031			2013-12-25 22:00:00	1097.92	-399.381	28.1321	-24.197			2013-12-25 22:30:00	1367.6	-278.123	7.356	-18.745
2013-12-22 21:55:00	1435.43	-409.5	28.6			2013-12-25 23:00:00	-23.2915			2013-12-25 23:00:00	1114.07	-398.488	28.2514	-24.691			2013-12-25 23:30:00	1374.46	-276.801	7.28147	-18.969
2013-12-22 22:28:00	1272.29	-410.3	24.5			2013-12-26	-26.0236			2013-12-26	1130.64	-397.585	28.4343	-25.102			2013-12-26 00:30:00	1382.32	-275.436	7.13883	-19.167
2013-12-22 23:13:00	1187.83	-413	26.6			2013-12-26 01:00:00	-27.4564			2013-12-26 01:00:00	1148.46	-396.578	28.5965	-25.383			2013-12-26 01:30:00	1391.08	-274.108	7.04102	-19.272
2013-12-22 23:46:00	1087.44	-414.7	23.2			2013-12-26 02:00:00	-28.2782			2013-12-26 02:00:00	1174.58	-395.19	28.6295	-25.599			2013-12-26 02:30:00	1398.84	-272.902	6.94952	-19.137
2013-12-23 00:19:00	1049.05	-414.7	27			2013-12-26 03:00:00	-26.6911			2013-12-26 03:00:00	1197.69	-393.999	28.6233	-25.597			2013-12-26 03:30:00	1405.51	-271.818	6.84991	-18.946
2013-12-23 01:04:00	983.569	-418	24.5			2013-12-26 04:00:00	-24.5248			2013-12-26 04:00:00	1226.46	-392.612	28.5705	-25.516			2013-12-26 04:30:00	1411.14	-270.855	6.7557	-18.855
2013-12-23 01:37:00	895.192	-421.6	29.3			2013-12-26 05:00:00	-27.1139			2013-12-26 05:00:00	1259.87	-391.071	28.4093	-25.193			2013-12-26 05:30:00	1416.17	-269.977	6.70298	-18.861
2013-12-23 02:10:00	856.3	-418	31.2			2013-12-26 06:00:00	-26.4698			2013-12-26 06:00:00	1302.68	-388.987	28.0467	-24.795			2013-12-26 06:30:00	1421.39	-269.133	6.65427	-19.005
2013-12-23 02:55:00	819.907	-422.9	27.3			2013-12-26 07:00:00	-24.5413			2013-12-26 07:00:00	1356.53	-385.675	27.5588	-24.087			2013-12-26 07:30:00	1428.97	-268.204	6.59839	-19.19
2013-12-23 03:28:00	795.118	-420.1	27.3			2013-12-26 08:00:00	-22.7777			2013-12-26 08:00:00	1378.12	-383.772	27.2308	-23.363			2013-12-26 08:30:00	1441.38	-267.115	6.52502	-19.281
2013-12-23 04:00:00	779.441	-421.8	27			2013-12-26 09:00:00	-18.5164			2013-12-26 09:00:00	1343.14	-386.479	27.1368	-22.213			2013-12-26 09:30:00	1459.48	-265.893	6.50471	-19.582
2013-12-23 04:46:00	814.052	-415.9	27.7			2013-12-26 10:00:00	-20.3061			2013-12-26 10:00:00	1355.8	-384.956	26.4897	-21.268			2013-12-26 10:30:00	1482.08	-264.613	6.45526	-19.087
2013-12-23 05:19:00	831.34	-415.2	24.4			2013-12-26 11:00:00	-21.1844			2013-12-26 11:00:00	1396.91	-380.785	25.3468	-20.581			2013-12-26 11:30:00	1521.54	-263.053	6.45634	-18.67
2013-12-23 05:52:00	861.918	-414.3	27			2013-12-26 12:00:00	-20.9			2013-12-26 12:00:00	1447.4	-376.231	24.1389	-20.057			2013-12-26 12:30:00	1561.33	-261.651	6.4663	-18.391
2013-12-23 06:37:00	973.127	-407.5	29.3			2013-12-26 13:00:00	-20.9905			2013-12-26 13:00:00	1478.37	-371.48	23.1564	-19.599			2013-12-26 13:30:00	1599.49	-260.487	6.47843	-18.166
2013-12-23 07:10:00	1109.67	-401.2	25.8			2013-12-26 14:00:00	-20.9307			2013-12-26 14:00:00	1515.35	-368.45	22.3974	-19.248			2013-12-26 14:30:00	1617.81	-260.153	6.4884	-17.999
2013-12-23 07:43:00	1158.03	-401.1	27			2013-12-26 15:00:00	-20.0833			2013-12-26 15:00:00	1545.56	-366.174	21.7318	-19.027			2013-12-26 15:30:00	1633.23	-259.955	6.48966	-17.939
2013-12-23 08:28:00	1323.8	-396.2	23.6			2013-12-26 16:00:00	-21.0354			2013-12-26 16:00:00	1558.05	-365.67	21.485	-18.895			2013-12-26 16:30:00	1650.47	-259.481	6.50029	-18.094
2013-12-23 09:01:00	1400.13	-393.7	24.3			2013-12-26 17:00:00	-21.8016			2013-12-26 17:00:00	1571.15	-364.775	20.8727	-18.938			2013-12-26 17:30:00	1657.7	-259.219	6.46838	-18.213
2013-12-23 09:34:00	1498.04	-390.6	29.3			2013-12-26 18:00:00	-21.871			2013-12-26 18:00:00	1594.34	-364.382	20.4906	-19.048			2013-12-26 18:30:00	1658.98	-259.288	6.44339	-18.011
2013-12-23 10:19:00	1628.22	-390.1	26.9			2013-12-26 19:00:00	-21.8052			2013-12-26 19:00:00	1594.3	-363.712	20.1037	-19.389			2013-12-26 19:30:00	1656.19	-259.609	6.45702	-18.099
2013-12-23 10:52:00	1699.66	-385	22.7			2013-12-26 20:00:00	-21.7746			2013-12-26 20:00:00	1584.57	-363.129	19.7703	-19.785			2013-12-26 20:30:00	1648.92	-260.161	6.44096	-18.321
2013-12-23 11:25:00	1717.52	-381.5	22.7			2013-12-26 21:00:00	-21.9592			2013-12-26 21:00:00	1572.3	-363.42	19.7605	-20.366			2013-12-26 21:30:00	1636.47	-260.958	6.41443	-18.244
2013-12-23 12:10:00	1713.69	-386.2	23.1			2013-12-26 22:00:00	-21.6166			2013-12-26 22:00:00	1553.18	-364.911	19.8013	-20.885			2013-12-26 22:30:00	1618.67	-262.026	6.35225	-18.262
2013-12-23 12:43:00	1732.88	-384.2	22.7			2013-12-26 23:00:00	-21.6833			2013-12-26 23:00:00	1515.38	-367.403	19.9506	-21.407			2013-12-26 23:30:00	1597.26	-263.247	6.37357	-18.405
2013-12-23 13:16:00	1714.2	-382.8	23			2013-12-27	-22.0572			2013-12-27	1481.12	-370.143	20.1087	-21.833			2013-12-27 00:30:00	1573.06	-264.588	6.34433	-18.668
2013-12-23 14:01:00	1782.09	-381.9	23.2			2013-12-27 01:00:00	-22.0548			2013-12-27 01:00:00	1441.69	-373.449	20.4164	-22.097			2013-12-27 01:30:00	1548.3	-265.932	6.31787	-18.994
2013-12-23 14:34:00	1795.7	-381.5	23.2			2013-12-27 02:00:00	-21.9348			2013-12-27 02:00:00	1406.59	-376.793	20.7733	-22.293			2013-12-27 02:30:00	1524.76	-267.173	6.30491	-19.339
2013-12-23 15:07:00	1811.94	-380.5	23.3			2013-12-27 03:00:00	-21.9597			2013-12-27 03:00:00	1370.75	-380.466	21.2116	-22.468			2013-12-27 03:30:00	1502.86	-268.32	6.30072	-19.611
2013-12-23 15:52:00	1843.66	-378.7	24.4			2013-12-27 04:00:00	-21.2992			2013-12-27 04:00:00	1340.35	-383.752	21.6076	-22.57			2013-12-27 04:30:00	1483.27	-269.341	6.27398	-19.747
2013-12-23 16:25:00	1862.81	-378.9	25.2			2013-12-27 05:00:00	-20.5141			2013-12-27 05:00:00	1324.27	-386.311	21.9046	-22.489			2013-12-27 05:30:00	1466.24	-270.238	6.2851	-19.787
2013-12-23 16:58:00	1884.14	-382.6	24.3			2013-12-27 06:00:00	-21.1216			2013-12-27 06:00:00	1310.77	-388.704	22.1574	-22.306			2013-12-27 06:30:00	1451.79	-271.022	6.28688	-19.83
2013-12-23 17:43:00	1871.23	-389.1	26			2013-12-27 07:00:00	-20.7464			2013-12-27 07:00:00	1305.08	-390.658	22.4659	-21.898			2013-12-27 07:30:00	1439.4	-271.699	6.28929	-19.699
2013-12-23 18:16:00	1819.49	-390	23.8			2013-12-27 08:00:00	-19.9121			2013-12-27 08:00:00	1302.99	-391.722	22.9795	-21.458			2013-12-27 08:30:00	1426.47	-272.385	6.30452	-19.358
2013-12-23 18:49:00	1725.33	-392.9	21.2			2013-12-27 09:00:00	-19.863			2013-12-27 09:00:00	1321.47	-390.597	22.5241	-20.855			2013-12-27 09:30:00	1416.16	-272.973	6.3146	-19.559
2013-12-23 19:34:00	1622.19	-395.6	18.7			2013-12-27 10:00:00	-19.9066			2013-12-27 10:00:00	1343.63	-388.07	21.8236	-20.456			2013-12-27 10:30:00	1412.41	-273.393	6.37165	-19.261
2013-12-23 20:16:00	1660.34	-390.4	16			2013-12-27 11:00:00	-20.5248			2013-12-27 11:00:00	1313.82	-381.737	20.127	-20.196			2013-12-27 11:30:00	1434.23	-273.059	6.45871	-18.91
2013-12-23 20:49:00	1254.56	-399.9	18.7			2013-12-27 12:00:00	-20.4966			2013-12-27 12:00:00	1322.26	-381.364	19.9254	-19.965			2013-12-27 12:30:00	1451.01	-272.926	6.53119	-18.604
2013-12-23 21:34:00	1017.25	-407.9	27.8			2013-12-27 13:00:00	-20.4834			2013-12-27 13:00:00	1336.36	-380.91	19.7391	-19.766			2013-12-27 13:30:00	1465.82	-272.894	6.63212	-18.351
2013-12-23 22:07:00	1013.77	-407.2	24.5			2013-12-27 14:00:00	-20.4169			2013-12-27 14:00:00	1343.89	-380.013	19.6087	-19.605			2013-12-27 14:30:00	1482	-272.825	6.73947	-18.173
2013-12-23 22:40:00	1007.69	-406	27.1			2013-12-27 15:00:00	-20.1423			2013-12-27 15:00:00	1351.99	-379.356	19.439	-19.527			2013-12-27 15:30:00	1492.91	-272.88	6.87622	-18.091
2013-12-23 23:25:00	889.939	-406	27.2			2013-12-27 16:00:00	-20.0638			2013-12-27 16:00:00	1367.45	-378.359	18.8909	-19.525			2013-12-27 16:30:00	1497.26	-273.091	6.96167	-18.216
2013-12-23 23:58:00	1238.76	-394.3	22.3			2013-12-27 17:00:00	-20.3061			2013-12-27 17:00:00	1370.18	-377.993	18.3837	-19.722			2013-12-27 17:30:00	1474.06	-274.088	6.99157	-18.7
2013-12-24 00:31:00	1100.65	-401	27			2013-12-27 18:00:00	-20.3489			2013-12-27 18:00:00	1372.65	-377.888	17.9259	-20.09			2013-12-27 18:30:00	1448.55	-275.135	7.02449	-19.291
2013-12-24 01:16:00	954.898	-404.4	33.8			2013-12-27 19:00:00	-20.5959			2013-12-27 19:00:00	1366.74	-378.334	18.1415	-20.77			2013-12-27 19:30:00	1423.63	-276.131	7.09222	-19.898
2013-12-24 01:49:00	827.525	-418.4	20.1			2013-12-27 20:00:00	-21.2379			2013-12-27 20:00:00	1355.17	-379.296	18.5842	-21.533			2013-12-27 20:30:00	1398.8	-277.113	7.12021	-20.522
2013-12-24 02:22:00	880.084	-421.5	27.1			2013-12-27 21:00:00	-25.1508			2013-12-27 21:00:00	1336.22	-381.109	19.3315	-22.309			2013-12-27 21:30:00	1373.2	-278.122	7.16733	-21.137
2013-12-24 03:07:00	1009.65	-417.9	34.7			2013-12-27 22:00:00	-27.1689			2013-12-27 22:00:00	1306.29	-384.053	20.4607	-23.022			2013-12-27 22:30:00	1346.78	-279.172	7.22133	-21.695
2013-12-24 03:40:00	1058.61	-422.4	36.6			2013-12-27 23:00:00	-28.9264			2013-12-27 23:00:00	1264.84	-388.291	22.1622	-23.673			2013-12-27 23:30:00	1319.81	-280.27	7.23676	-22.217
2013-12-24 04:13:00	1019.1	-420.3	37.2			2013-12-28	-30.1356			2013-12-28	1215.12	-393.745	24.1998	-24.255			2013-12-28 00:30:00	1292.64	-281.41	7.267	-22.687
2013-12-24 04:58:00	910.683	-422	28.6			2013-12-28 01:00:00	-31.0464			2013-12-28 01:00:00	1161.42	-400.497	26.2168	-24.695			2013-12-28 01:30:00	1265.9	-282.561	7.28632	-23.038
2013-12-24 05:31:00	858.275	-427.7	19.6			2013-12-28 02:00:00	-31.4105			2013-12-28 02:00:00	1108.24	-408.598	27.9696	-25.06			2013-12-28 02:30:00	1240.31	-283.682	7.32545	-23.256
2013-12-24 06:04:00	837.64	-425.9	25.6			2013-12-28 03:00:00	-31.5495			2013-12-28 03:00:00	1058.63	-417.373	29.9137	-25.254			2013-12-28 03:30:00	1216.37	-284.734	7.39567	-23.328
2013-12-24 06:49:00	877.887	-423.9	29.7			2013-12-28 04:00:00	-31.0962			2013-12-28 04:00:00	1014.37	-426.202	31.5601	-25.358			2013-12-28 04:30:00	1194.63	-285.678	7.3966	-23.252
2013-12-24 07:22:00	931.552	-421.3	27.4			2013-12-28 05:00:00	-30.4331			2013-12-28 05:00:00	977.774	-434.365	32.9953	-25.263			2013-12-28 05:30:00	1175.69	-286.466	7.43093	-22.998
2013-12-24 07:55:00	994.691	-419.3	27.4			2013-12-28 06:00:00	-29.4108			2013-12-28 06:00:00	950.383	-441.105	33.9048	-25.063			2013-12-28 06:30:00	1160.22	-287.056	7.5144	-22.543
2013-12-24 08:40:00	1114.58	-416.4	32.3			2013-12-28 07:00:00	-28.2041			2013-12-28 07:00:00	935.02	-445.282	34.085	-24.713			2013-12-28 07:30:00	1149.12	-287.399	7.51272	-21.902
2013-12-24 09:13:00	1187.49	-412.7	31			2013-12-28 08:00:00	-26.743			2013-12-28 08:00:00	933.368	-446.425	33.6158	-24.281			2013-12-28 08:30:00	1143.2	-287.529	7.60018	-21.083
2013-12-24 09:46:00	1227.49	-415.7	37.1			2013-12-28 09:00:00	-25.3167			2013-12-28 09:00:00	945.985	-445.727	32.8905	-23.764			2013-12-28 09:30:00	1145.16	-287.312	7.62675	-20.19
2013-12-24 10:31:00	1244.17	-414.1	48			2013-12-28 10:00:00	-24.0115			2013-12-28 10:00:00	971.387	-443.626	31.9109	-23.204			2013-12-28 10:30:00	1161.54	-286.413	7.71352	-19.408
2013-12-24 11:04:00	1282.63	-415.5	42.4			2013-12-28 11:00:00	-23.0093			2013-12-28 11:00:00	1005.75	-440.582	30.7035	-22.658			2013-12-28 11:30:00	1214.88	-283.85	7.84954	-18.923
2013-12-24 11:37:00	1363.1	-414.3	34.4			2013-12-28 12:00:00	-22.3315			2013-12-28 12:00:00	1045.5	-437.281	30.1907	-22.147			2013-12-28 12:30:00	1280.7	-280.975	7.9928	-18.603
2013-12-24 12:22:00	1443.99	-407.1	34.8			2013-12-28 13:00:00	-21.7005			2013-12-28 13:00:00	1085.12	-434.666	29.0056	-21.754			2013-12-28 13:30:00	1320.38	-279.311	8.10003	-18.343
2013-12-24 12:55:00	1443.15	-406.7	33.1			2013-12-28 14:00:00	-21.5598			2013-12-28 14:00:00	1115.93	-432.587	28.0389	-21.444			2013-12-28 14:30:00	1347.75	-278.195	8.15819	-18.174
2013-12-24 13:28:00	1472.82	-405.2	32.4			2013-12-28 15:00:00	-21.6293			2013-12-28 15:00:00	1129.67	-431.59	27.4963	-21.313			2013-12-28 15:30:00	1379.27	-277.049	8.2029	-18.109
2013-12-24 14:13:00	1477.2	-403.5	31.7			2013-12-28 16:00:00	-21.2815			2013-12-28 16:00:00	1131.87	-431.333	27.2994	-21.385			2013-12-28 16:30:00	1369.74	-277.344	8.20881	-18.348
2013-12-24 14:46:00	1472.21	-403.1	32.3			2013-12-28 17:00:00	-20.9289			2013-12-28 17:00:00	1129.25	-431.288	27.2674	-21.715			2013-12-28 17:30:00	1343.57	-278.193	8.2324	-18.618
2013-12-24 15:19:00	1500.12	-402.3	31.7			2013-12-28 18:00:00	-19.9023			2013-12-28 18:00:00	1125.8	-431.2	27.2796	-22.18			2013-12-28 18:30:00	1325.08	-278.761	8.2087	-18.184
2013-12-24 16:04:00	1470.76	-408.6	30.6			2013-12-28 19:00:00	-20.929			2013-12-28 19:00:00	1123.05	-431.053	27.2844	-22.814			2013-12-28 19:30:00	1310.2	-279.168	8.21554	-18.311
2013-12-24 16:37:00	1408.39	-410.2	34.8			2013-12-28 20:00:00	-23.5138			2013-12-28 20:00:00	1121.99	-430.905	27.3419	-23.527			2013-12-28 20:30:00	1298.23	-279.412	8.20242	-18.379
2013-12-24 17:10:00	1395.71	-407.3	34.2			2013-12-28 21:00:00	-25.6152			2013-12-28 21:00:00	1122.32	-430.666	27.4202	-24.308			2013-12-28 21:30:00	1288.28	-279.545	8.22429	-18.315
2013-12-24 17:55:00	1436.51	-409.1	33.2			2013-12-28 22:00:00	-27.8141			2013-12-28 22:00:00	1123.5	-430.373	27.5383	-25.086			2013-12-28 22:30:00	1279.43	-279.602	8.19529	-18.331
2013-12-24 18:28:00	1408.51	-407.6	33.1			2013-12-28 23:00:00	-30.1859			2013-12-28 23:00:00	1125	-430.042	27.7684	-25.803			2013-12-28 23:30:00	1271.35	-279.583	8.17089	-18.9
2013-12-24 19:01:00	1352.21	-409.8	33.1			2013-12-29	-31.629			2013-12-29	1126.47	-429.699	28.0422	-26.424			2013-12-29 00:30:00	1263.53	-279.533	8.16572	-19.033
2013-12-24 20:27:00	1048.29	-413.9	41.1			2013-12-29 01:00:00	-33.1528			2013-12-29 01:00:00	1127.87	-429.367	28.3225	-26.883			2013-12-29 01:30:00	1256.43	-279.419	8.16994	-20.447
2013-12-24 21:00:00	960.786	-426.4	36.4			2013-12-29 02:00:00	-33.4143			2013-12-29 02:00:00	1129.01	-429.033	28.6126	-27.246			2013-12-29 02:30:00	1250.64	-279.226	8.14949	-21.067
2013-12-24 21:45:00	833.508	-426.2	35.3			2013-12-29 03:00:00	-33.1059			2013-12-29 03:00:00	1129.83	-428.729	28.8403	-27.398			2013-12-29 03:30:00	1245.99	-278.994	8.14828	-21.532
2013-12-24 22:18:00	749.321	-423.5	40.9			2013-12-29 04:00:00	-32.4105			2013-12-29 04:00:00	1130.2	-428.495	28.9876	-27.431			2013-12-29 04:30:00	1242.55	-278.73	8.1057	-21.837
2013-12-24 22:51:00	696.16	-424.4	41.9			2013-12-29 05:00:00	-31.2336			2013-12-29 05:00:00	1129.49	-428.376	29.1394	-27.224			2013-12-29 05:30:00	1240.64	-278.411	8.06891	-22.244
2013-12-24 23:36:00	626.955	-429.2	42.3			2013-12-29 06:00:00	-30.1554			2013-12-29 06:00:00	1126.78	-428.348	29.5711	-26.843			2013-12-29 06:30:00	1240.82	-278.009	8.09026	-22.263
2013-12-25 00:09:00	604.532	-435.5	43.8			2013-12-29 07:00:00	-28.8395			2013-12-29 07:00:00	1121.01	-428.49	30.5776	-26.272			2013-12-29 07:30:00	1242.99	-277.573	8.07315	-21.8
2013-12-25 00:42:00	585.804	-439.1	42.8			2013-12-29 08:00:00	-27.7367			2013-12-29 08:00:00	1111.62	-428.999	31.9411	-25.625			2013-12-29 08:30:00	1247.62	-277.158	8.05958	-20.966
2013-12-25 01:27:00	550.129	-438.7	48			2013-12-29 09:00:00	-26.5711			2013-12-29 09:00:00	1099.37	-429.854	33.6418	-24.939			2013-12-29 09:30:00	1259.64	-276.665	8.08257	-20.077
2013-12-25 02:00:00	530.734	-436.2	28.6			2013-12-29 10:00:00	-25.537			2013-12-29 10:00:00	1084.6	-431.231	35.2107	-24.288			2013-12-29 10:30:00	1296.75	-275.431	8.19477	-19.501
2013-12-25 02:33:00	516.859	-442.8	41.8			2013-12-29 11:00:00	-24.4259			2013-12-29 11:00:00	1070.1	-432.829	36.6414	-23.875			2013-12-29 11:30:00	1343.29	-274.049	8.2862	-19.132
2013-12-25 03:18:00	529.521	-435.1	48.6			2013-12-29 12:00:00	-24.1392			2013-12-29 12:00:00	1065.1	-433.142	37.3079	-23.48			2013-12-29 12:30:00	1374.99	-273.337	8.36286	-18.823
2013-12-25 05:42:00	604.723	-437.3	48.6			2013-12-29 13:00:00	-23.7702			2013-12-29 13:00:00	1071.31	-432.16	37.3181	-23.136			2013-12-29 13:30:00	1395.18	-273.114	8.43087	-18.583
2013-12-25 06:15:00	651.013	-433.5	43.7			2013-12-29 14:00:00	-23.3243			2013-12-29 14:00:00	1084.02	-430.726	36.8696	-22.852			2013-12-29 14:30:00	1407.51	-273.216	8.50084	-18.426
2013-12-25 07:00:00	717.893	-427.7	44.4			2013-12-29 15:00:00	-23.072			2013-12-29 15:00:00	1093.19	-429.891	36.3534	-22.678			2013-12-29 15:30:00	1418.9	-273.44	8.61924	-18.369
2013-12-25 07:33:00	770.315	-423.6	46			2013-12-29 16:00:00	-22.9348			2013-12-29 16:00:00	1095.02	-429.968	35.793	-22.624			2013-12-29 16:30:00	1430.75	-273.716	8.71216	-18.451
2013-12-25 08:06:00	846.128	-422.2	38.2			2013-12-29 17:00:00	-22.8359			2013-12-29 17:00:00	1089.56	-431.023	35.1954	-22.769			2013-12-29 17:30:00	1416.78	-274.912	8.80788	-18.796
2013-12-25 08:51:00	954.684	-426.6	44.4			2013-12-29 18:00:00	-22.9562			2013-12-29 18:00:00	1078.59	-432.8	34.5788	-23.049			2013-12-29 18:30:00	1377.69	-277.083	8.86503	-19.308
2013-12-25 09:24:00	1026.95	-423.6	41.6			2013-12-29 19:00:00	-23.9351			2013-12-29 19:00:00	1062.9	-434.894	34.0602	-23.547			2013-12-29 19:30:00	1332.44	-279.599	8.92917	-19.925
2013-12-25 09:57:00	1116.93	-418.3	41.6			2013-12-29 20:00:00	-25.7944			2013-12-29 20:00:00	1040.88	-437.101	33.6985	-24.11			2013-12-29 20:30:00	1284.4	-282.334	9.02423	-20.593
2013-12-25 10:42:00	1224.73	-412.4	39.2			2013-12-29 21:00:00	-27.5646			2013-12-29 21:00:00	1011.11	-439.135	33.9433	-24.738			2013-12-29 21:30:00	1234.34	-285.284	9.10303	-21.281
2013-12-25 11:15:00	1331.68	-408.9	39.8			2013-12-29 22:00:00	-29.3023			2013-12-29 22:00:00	975.507	-441.756	34.1933	-25.37			2013-12-29 22:30:00	1184.92	-288.321	9.16737	-21.965
2013-12-25 11:48:00	1332.15	-414.1	40			2013-12-29 23:00:00	-30.791			2013-12-29 23:00:00	937.135	-445.524	34.5634	-25.974			2013-12-29 23:30:00	1138.78	-291.242	9.22935	-22.542
2013-12-25 12:33:00	1386.88	-407.9	38.8			2013-12-30	-32.0211			2013-12-30	896.88	-450.75	36.2522	-26.509			2013-12-30 00:30:00	1096.7	-293.962	9.23617	-22.987
2013-12-25 13:06:00	1388.19	-409.5	31.3			2013-12-30 01:00:00	-32.5743			2013-12-30 01:00:00	855.286	-456.288	39.4256	-26.912			2013-12-30 01:30:00	1059.96	-296.345	9.19674	-23.327
2013-12-25 13:39:00	1422.55	-408.5	29			2013-12-30 02:00:00	-32.573			2013-12-30 02:00:00	812.514	-461.587	42.5478	-27.224			2013-12-30 02:30:00	1029.47	-298.272	9.19918	-23.53
2013-12-25 14:24:00	1384.74	-407.6	33			2013-12-30 03:00:00	-32.392			2013-12-30 03:00:00	772.144	-466.197	43.8476	-27.378			2013-12-30 03:30:00	1005.55	-299.667	9.13872	-23.558
2013-12-25 14:57:00	1357.06	-408.4	28.4			2013-12-30 04:00:00	-31.7611			2013-12-30 04:00:00	737.808	-470.067	43.0862	-27.445			2013-12-30 04:30:00	988.761	-300.442	9.0561	-23.382
2013-12-25 15:30:00	1314.87	-410.3	27.7			2013-12-30 05:00:00	-30.9761			2013-12-30 05:00:00	714.207	-470.668	40.1988	-27.326			2013-12-30 05:30:00	980.345	-300.553	9.01172	-23.018
2013-12-25 16:15:00	1345.47	-411.8	29.4			2013-12-30 06:00:00	-30.2911			2013-12-30 06:00:00	704.408	-465.857	36.2698	-27.096			2013-12-30 06:30:00	982.46	-299.897	8.95368	-22.5
2013-12-25 16:48:00	1352.44	-412.7	29.2			2013-12-30 07:00:00	-29.5346			2013-12-30 07:00:00	710.399	-456.603	32.3534	-26.702			2013-12-30 07:30:00	998.377	-298.235	8.97134	-21.889
2013-12-25 17:21:00	1437.36	-411	30.3			2013-12-30 08:00:00	-28.5118			2013-12-30 08:00:00	730.073	-447.123	28.7659	-26.229			2013-12-30 08:30:00	1032.96	-295.343	8.93132	-21.275
2013-12-25 18:06:00	1454.63	-411.3	28.1			2013-12-30 09:00:00	-27.36			2013-12-30 09:00:00	759.206	-438.877	26.6167	-25.689			2013-12-30 09:30:00	1091.18	-291.217	8.93241	-20.739
2013-12-25 18:39:00	1408.75	-409.3	30			2013-12-30 10:00:00	-26.1			2013-12-30 10:00:00	793.098	-431.546	25.6239	-25.099			2013-12-30 10:30:00	1144.1	-287.65	8.92619	-20.246
2013-12-25 19:12:00	1401.57	-408.4	30.2			2013-12-30 11:00:00	-24.8534			2013-12-30 11:00:00	826.585	-424.931	25.2354	-24.486			2013-12-30 11:30:00	1188.83	-284.68	8.88066	-19.795
2013-12-25 20:05:00	1380.57	-409	29.1			2013-12-30 12:00:00	-23.3661			2013-12-30 12:00:00	858.07	-418.988	24.6204	-23.901			2013-12-30 12:30:00	1230.79	-281.872	8.85329	-19.394
2013-12-25 20:37:00	1369.04	-408.7	29.4			2013-12-30 13:00:00	-22.5474			2013-12-30 13:00:00	883.095	-413.972	23.957	-23.409			2013-12-30 13:30:00	1268.65	-279.37	8.81118	-19.074
2013-12-25 21:10:00	1398.7	-410.3	37.4			2013-12-30 14:00:00	-22.173			2013-12-30 14:00:00	899.284	-410.172	23.3628	-23.027			2013-12-30 14:30:00	1312.26	-277.027	8.78039	-18.846
2013-12-25 21:55:00	1366.07	-410.6	26.1			2013-12-30 15:00:00	-22.1772			2013-12-30 15:00:00	907.698	-406.414	22.9833	-22.814			2013-12-30 15:30:00	1344.88	-275.35	8.77016	-18.728
2013-12-25 22:28:00	1365.48	-410.3	24.6			2013-12-30 16:00:00	-22.3777			2013-12-30 16:00:00	921.312	-402.311	23.001	-22.774			2013-12-30 16:30:00	1373.31	-274.139	8.72168	-18.789
2013-12-25 23:01:00	1326.15	-408	26.6			2013-12-30 17:00:00	-22.5926			2013-12-30 17:00:00	930.575	-399.151	22.9493	-22.965			2013-12-30 17:30:00	1375.93	-274.04	8.76235	-19.136
2013-12-25 23:46:00	1128	-418.2	22			2013-12-30 18:00:00	-22.6726			2013-12-30 18:00:00	933.31	-396.453	22.8587	-23.271			2013-12-30 18:30:00	1351.05	-274.975	8.74211	-19.711
2013-12-26 00:19:00	1012.9	-422.5	21.8			2013-12-30 19:00:00	-22.6779			2013-12-30 19:00:00	932.416	-393.52	22.659	-23.739			2013-12-30 19:30:00	1318.08	-276.374	8.69386	-20.389
2013-12-26 00:52:00	901.296	-428.8	35.3			2013-12-30 20:00:00	-24.1493			2013-12-30 20:00:00	928.01	-390.693	22.3066	-24.264			2013-12-30 20:30:00	1281.18	-278.167	8.66315	-21.076
2013-12-26 01:37:00	810.051	-437.7	32.8			2013-12-30 21:00:00	-26.1954			2013-12-30 21:00:00	918.53	-388.785	21.8387	-24.831			2013-12-30 21:30:00	1242.01	-280.336	8.66544	-21.709
2013-12-26 02:10:00	717.395	-437.6	40.8			2013-12-30 22:00:00	-27.6213			2013-12-30 22:00:00	898.162	-389.822	22.9588	-25.393			2013-12-30 22:30:00	1201.53	-282.779	8.63631	-22.249
2013-12-26 02:43:00	595.535	-424.1	34.8			2013-12-30 23:00:00	-28.0759			2013-12-30 23:00:00	868.769	-394.645	24.8298	-25.903			2013-12-30 23:30:00	1160.72	-285.431	8.64625	-22.674
2013-12-26 03:28:00	661.356	-423.5	27.6			2013-12-31	-28.6715			2013-12-31	832.339	-399.132	24.0879	-26.381			2013-12-31 00:30:00	1120.32	-288.247	8.57043	-22.966
2013-12-26 04:01:00	680.183	-419.2	28.4			2013-12-31 01:00:00	-29.4159			2013-12-31 01:00:00	788.349	-403.884	23.0736	-26.748			2013-12-31 01:30:00	1081.38	-291.155	8.51876	-23.13
2013-12-26 04:34:00	639.444	-422.8	28.8			2013-12-31 02:00:00	-29.762			2013-12-31 02:00:00	742.558	-409.625	25.8137	-27.057			2013-12-31 02:30:00	1045.59	-294.009	8.52406	-23.17
2013-12-26 05:19:00	860.564	-423.4	28.7			2013-12-31 03:00:00	-29.5374			2013-12-31 03:00:00	716.487	-409.336	22.999	-27.207			2013-12-31 03:30:00	1014.85	-296.6	8.43881	-23.066
2013-12-26 05:52:00	808.924	-426.2	28.5			2013-12-31 04:00:00	-29.298			2013-12-31 04:00:00	706.53	-407.83	20.8074	-27.267			2013-12-31 04:30:00	991.457	-298.71	8.42108	-22.808
2013-12-26 06:25:00	883.436	-422.2	29.2			2013-12-31 05:00:00	-27.8511			2013-12-31 05:00:00	711.153	-407.353	18.5154	-27.13			2013-12-31 05:30:00	978.019	-300.228	8.39371	-22.401
2013-12-26 07:10:00	952.867	-423.3	32.4			2013-12-31 06:00:00	-27.0513			2013-12-31 06:00:00	722.231	-407.939	19.8319	-26.868			2013-12-31 06:30:00	977.068	-300.866	8.36443	-21.886
2013-12-26 07:43:00	1002.59	-420.8	35.7			2013-12-31 07:00:00	-26.1931			2013-12-31 07:00:00	739.724	-406.468	20.6011	-26.426			2013-12-31 07:30:00	991.202	-300.32	8.40251	-21.321
2013-12-26 08:16:00	1064.23	-416.3	43.2			2013-12-31 08:00:00	-25.1761			2013-12-31 08:00:00	764.82	-405.166	22.3288	-25.866			2013-12-31 08:30:00	1023.37	-298.485	8.48416	-20.75
2013-12-26 09:01:00	1131.03	-405.5	27.5			2013-12-31 09:00:00	-24.0934			2013-12-31 09:00:00	797.655	-408.099	20.3397	-25.204			2013-12-31 09:30:00	1074.75	-295.526	8.55972	-20.217
2013-12-26 09:34:00	1175	-407.3	23.7			2013-12-31 10:00:00	-23.0703			2013-12-31 10:00:00	835.066	-413.469	21.0896	-24.508			2013-12-31 10:30:00	1123.83	-292.88	8.625	-19.723
2013-12-26 10:07:00	1163.9	-414.1	31.3			2013-12-31 11:00:00	-22.321			2013-12-31 11:00:00	871.331	-415.883	24.0345	-23.838			2013-12-31 11:30:00	1177.69	-290.108	8.64348	-19.286
2013-12-26 10:52:00	1142.48	-414.1	33.7			2013-12-31 12:00:00	-21.5585			2013-12-31 12:00:00	906.894	-416.587	25.1645	-23.216			2013-12-31 12:30:00	1201.92	-288.803	8.65318	-18.888
2013-12-26 11:25:00	1162.89	-414.9	34.2			2013-12-31 13:00:00	-21.0938			2013-12-31 13:00:00	934.151	-417.106	25.7514	-22.722			2013-12-31 13:30:00	1249.74	-286.534	8.68657	-18.597
2013-12-26 11:58:00	1214.99	-411.7	30.7			2013-12-31 14:00:00	-20.7631			2013-12-31 14:00:00	952.267	-419.453	25.3509	-22.34			2013-12-31 14:30:00	1287.82	-284.857	8.73604	-18.401
2013-12-26 12:43:00	1280.89	-406.6	30.3			2013-12-31 15:00:00	-20.5448			2013-12-31 15:00:00	969.929	-422.103	25.8863	-22.1			2013-12-31 15:30:00	1301.34	-284.242	8.74954	-18.324
2013-12-26 13:16:00	1323.21	-404.2	28.4			2013-12-31 16:00:00	-20.463			2013-12-31 16:00:00	987.682	-423.322	26.7372	-21.979			2013-12-31 16:30:00	1302.9	-284.206	8.77541	-18.414
2013-12-26 13:49:00	1415.35	-406.6	30.5			2013-12-31 17:00:00	-20.4569			2013-12-31 17:00:00	999.907	-423.902	26.9252	-22.055			2013-12-31 17:30:00	1310.03	-284.045	8.85869	-18.718
2013-12-26 14:35:00	1485.23	-406.5	29.2			2013-12-31 18:00:00	-20.7759			2013-12-31 18:00:00	1001.65	-424.679	26.2713	-22.248			2013-12-31 18:30:00	1304.38	-284.502	8.86981	-19.205
2013-12-26 15:08:00	1506.72	-403.4	29.4			2013-12-31 19:00:00	-21.7164			2013-12-31 19:00:00	985.609	-425.301	23.6134	-22.646			2013-12-31 19:30:00	1269.96	-286.286	8.92683	-19.83
2013-12-26 15:40:00	1550.75	-402.3	29.5			2013-12-31 20:00:00	-22.9231			2013-12-31 20:00:00	960.929	-426.639	20.9237	-23.116			2013-12-31 20:30:00	1225.49	-288.805	8.93107	-20.596
2013-12-26 16:26:00	1510.64	-405.5	33.7			2013-12-31 21:00:00	-24.1546			2013-12-31 21:00:00	935.55	-430.31	21.9882	-23.709			2013-12-31 21:30:00	1179.03	-291.751	9.00623	-21.408
2013-12-26 16:58:00	1440.49	-402.4	42.3			2013-12-31 22:00:00	-24.9213			2013-12-31 22:00:00	912.168	-435.169	25.6125	-24.295			2013-12-31 22:30:00	1135.28	-294.794	9.0425	-22.232
2013-12-26 17:32:00	1406.6	-403.5	34.7			2013-12-31 23:00:00	-24.6746			2013-12-31 23:00:00	890.053	-439.401	27.0278	-24.837			2013-12-31 23:30:00	1098.87	-297.454	9.06986	-22.978
2013-12-26 18:17:00	1348.31	-400.4	29.7			2014-01-01	-26.1079			2014-01-01	869.111	-441.296	27.5297	-25.314			2014-01-01 00:30:00	1068.28	-299.803	9.11556	-23.27
2013-12-26 18:50:00	1334.38	-399.4	34.5			2014-01-01 01:00:00	-26.9234			2014-01-01 01:00:00	850.39	-443.753	26.1542	-25.664			2014-01-01 01:30:00	1052.15	-300.971	9.12872	-23.129
2013-12-26 19:23:00	1306.67	-399.8	27.3			2014-01-01 02:00:00	-27.3257			2014-01-01 02:00:00	834.333	-447.199	24.8721	-25.933			2014-01-01 02:30:00	1058.76	-300.147	9.08177	-23.061
2013-12-26 20:16:00	1279.03	-392.3	29.7			2014-01-01 03:00:00	-27.612			2014-01-01 03:00:00	821.57	-450.753	26.0763	-26.011			2014-01-01 03:30:00	1067.91	-299.197	9.03926	-23.184
2013-12-26 20:49:00	1311.48	-383.2	33			2014-01-01 04:00:00	-27.04			2014-01-01 04:00:00	813.402	-453.384	27.1093	-25.985			2014-01-01 04:30:00	1067.02	-299.151	9.0112	-22.992
2013-12-26 21:22:00	1307.38	-383.3	33			2014-01-01 05:00:00	-26.573			2014-01-01 05:00:00	820.893	-450.758	27.1993	-25.768			2014-01-01 05:30:00	1063.79	-299.29	8.97335	-22.475
2013-12-26 22:07:00	1286.71	-377.6	26.5			2014-01-01 06:00:00	-26.0098			2014-01-01 06:00:00	838.683	-442.932	28.1705	-25.417			2014-01-01 06:30:00	1068.56	-298.879	8.94313	-21.803
2013-12-26 22:40:00	1267.42	-380.3	27.2			2014-01-01 07:00:00	-24.5228			2014-01-01 07:00:00	865.054	-435.163	27.6947	-24.93			2014-01-01 07:30:00	1089.75	-297.492	8.95945	-21.19
2013-12-26 23:13:00	1226.45	-384.8	27.2			2014-01-01 08:00:00	-23.2838			2014-01-01 08:00:00	901.815	-429.157	26.897	-24.374			2014-01-01 08:30:00	1130.31	-295.058	8.98897	-20.634
2013-12-26 23:58:00	1151.49	-386.5	27.8			2014-01-01 09:00:00	-22.3493			2014-01-01 09:00:00	943.573	-424.946	27.361	-23.749			2014-01-01 09:30:00	1188.93	-291.872	9.00719	-20.111
2013-12-27 00:31:00	1151.26	-393.5	33.1			2014-01-01 10:00:00	-21.469			2014-01-01 10:00:00	988.778	-421.608	26.8052	-23.107			2014-01-01 10:30:00	1251.47	-288.75	9.02013	-19.62
2013-12-27 01:04:00	1142.93	-388.9	28.6			2014-01-01 11:00:00	-20.7223			2014-01-01 11:00:00	1035.69	-418.222	26.0504	-22.47			2014-01-01 11:30:00	1290.18	-286.968	8.9958	-19.158
2013-12-27 01:49:00	1151.04	-393.3	30.7			2014-01-01 12:00:00	-20.1375			2014-01-01 12:00:00	1082.46	-414.233	24.3287	-21.868			2014-01-01 12:30:00	1346.44	-284.604	9.01744	-18.738
2013-12-27 02:22:00	1152.28	-390.2	28.4			2014-01-01 13:00:00	-19.6911			2014-01-01 13:00:00	1124.33	-409.779	21.7654	-21.385			2014-01-01 13:30:00	1374.54	-283.437	9.01092	-18.376
2013-12-27 02:55:00	1154.64	-390.5	26.5			2014-01-01 14:00:00	-19.3485			2014-01-01 14:00:00	1160.05	-405.771	20.3275	-21.012			2014-01-01 14:30:00	1405.45	-282.26	8.97768	-18.123
2013-12-27 03:40:00	1184.31	-388.5	23.5			2014-01-01 15:00:00	-19.0115			2014-01-01 15:00:00	1188.32	-402.15	19.5298	-20.849			2014-01-01 15:30:00	1443.13	-281.072	9.03524	-18.018
2013-12-27 04:13:00	1197.74	-392	22.5			2014-01-01 16:00:00	-18.7326			2014-01-01 16:00:00	1208.95	-398.49	16.4544	-20.847			2014-01-01 16:30:00	1455.62	-280.944	9.03291	-18.148
2013-12-27 04:46:00	1250.64	-388.6	26			2014-01-01 17:00:00	-18.5177			2014-01-01 17:00:00	1221.14	-395.893	13.7788	-21.06			2014-01-01 17:30:00	1429.95	-282.204	9.06421	-18.52
2013-12-27 05:31:00	1077.03	-398.3	29.7			2014-01-01 18:00:00	-18.9315			2014-01-01 18:00:00	1224.94	-394.817	12.673	-21.408			2014-01-01 18:30:00	1389.81	-284.035	9.05269	-19.066
2013-12-27 06:04:00	992.853	-403.8	28.1			2014-01-01 19:00:00	-18.6925			2014-01-01 19:00:00	1217.09	-395.712	14.3238	-21.911			2014-01-01 19:30:00	1344.49	-286.176	9.06477	-19.709
2013-12-27 06:37:00	970.655	-404.9	30.1			2014-01-01 20:00:00	-20.4454			2014-01-01 20:00:00	1199.6	-398.47	15.0874	-22.483			2014-01-01 20:30:00	1297.07	-288.558	9.05687	-20.388
2013-12-27 07:22:00	986.589	-401.3	40.5			2014-01-01 21:00:00	-22.8197			2014-01-01 21:00:00	1172.08	-402.599	17.6926	-23.115			2014-01-01 21:30:00	1248.78	-291.198	9.04134	-21.042
2013-12-27 07:55:00	1002.27	-397.2	62.5			2014-01-01 22:00:00	-24.2377			2014-01-01 22:00:00	1128.1	-408.706	21.864	-23.748			2014-01-01 22:30:00	1199.15	-294.13	9.07842	-21.635
2013-12-27 08:29:00	1073.5	-394.3	72.1			2014-01-01 23:00:00	-25.287			2014-01-01 23:00:00	1069.14	-417.035	24.8669	-24.358			2014-01-01 23:30:00	1150.51	-297.245	9.11181	-22.145
2013-12-27 09:13:00	956.396	-398	65.8			2014-01-02	-26.2867			2014-01-02	1005.55	-426.906	26.4311	-24.924			2014-01-02 00:30:00	1103.73	-300.488	9.20433	-22.535
2013-12-27 09:46:00	999.019	-397.6	64			2014-01-02 01:00:00	-27.0487			2014-01-02 01:00:00	948.356	-437.436	27.592	-25.39			2014-01-02 01:30:00	1059.6	-303.785	9.31479	-22.797
2013-12-27 10:20:00	956.717	-399.1	49.2			2014-01-02 02:00:00	-27.5926			2014-01-02 02:00:00	902.414	-447.726	29.3653	-25.781			2014-01-02 02:30:00	1019.71	-306.962	9.39258	-22.913
2013-12-27 11:04:00	891.829	-404.6	28.7			2014-01-02 03:00:00	-27.9128			2014-01-02 03:00:00	866.219	-456.778	31.5005	-26.002			2014-01-02 03:30:00	985.995	-309.786	9.55762	-22.847
2013-12-27 11:37:00	889.519	-406.8	32.1			2014-01-02 04:00:00	-27.6966			2014-01-02 04:00:00	834.106	-461.526	33.7719	-26.114			2014-01-02 04:30:00	960.765	-312.038	9.72834	-22.594
2013-12-27 12:10:00	896.244	-406.5	27.2			2014-01-02 05:00:00	-27.3469			2014-01-02 05:00:00	808.784	-459.763	34.0602	-26.04			2014-01-02 05:30:00	946.639	-313.409	9.95594	-22.169
2013-12-27 12:55:00	919.884	-406.5	22.8			2014-01-02 06:00:00	-26.7448			2014-01-02 06:00:00	796.131	-451.812	31.7683	-25.833			2014-01-02 06:30:00	946.558	-313.536	10.1271	-21.612
2013-12-27 13:28:00	926.244	-406.1	23.8			2014-01-02 07:00:00	-25.8744			2014-01-02 07:00:00	799.694	-440.699	29.5812	-25.472			2014-01-02 07:30:00	963.317	-312.197	10.3596	-20.987
2013-12-27 14:02:00	876.109	-405.8	22.5			2014-01-02 08:00:00	-24.7579			2014-01-02 08:00:00	818.306	-430.168	27.5471	-25.013			2014-01-02 08:30:00	998.8	-309.373	10.5577	-20.347
2013-12-27 14:46:00	861.918	-401.5	21.9			2014-01-02 09:00:00	-23.4728			2014-01-02 09:00:00	848.132	-420.619	26.656	-24.468			2014-01-02 09:30:00	1053.16	-305.331	10.7272	-19.746
2013-12-27 15:20:00	896.139	-401.1	21.9			2014-01-02 10:00:00	-22.1444			2014-01-02 10:00:00	883.54	-412.115	25.1091	-23.864			2014-01-02 10:30:00	1123.36	-300.66	10.8496	-19.215
2013-12-27 15:53:00	906.039	-396.2	13.8			2014-01-02 11:00:00	-21.0807			2014-01-02 11:00:00	917.318	-405.359	22.6394	-23.272			2014-01-02 11:30:00	1188.66	-296.77	10.9978	-18.743
2013-12-27 16:38:00	934.422	-397.1	16.1			2014-01-02 12:00:00	-20.2431			2014-01-02 12:00:00	946.31	-400.503	21.4714	-22.722			2014-01-02 12:30:00	1232.02	-294.368	11.123	-18.335
2013-12-27 17:11:00	942.513	-396	22			2014-01-02 13:00:00	-19.6413			2014-01-02 13:00:00	971.138	-397.366	21.2337	-22.312			2014-01-02 13:30:00	1288.66	-291.391	11.1718	-18.022
2013-12-27 17:44:00	907.833	-391.7	17.9			2014-01-02 14:00:00	-19.6782			2014-01-02 14:00:00	990.308	-396.046	21.1349	-21.997			2014-01-02 14:30:00	1334.2	-288.996	11.2431	-17.815
2013-12-27 18:29:00	948.273	-391.3	23.3			2014-01-02 15:00:00	-19.9239			2014-01-02 15:00:00	1004.55	-395.791	20.8491	-21.842			2014-01-02 15:30:00	1375.33	-286.739	11.2545	-17.765
2013-12-27 19:02:00	981.629	-392.3	24.1			2014-01-02 16:00:00	-19.8267			2014-01-02 16:00:00	1017.08	-396.105	20.6877	-21.814			2014-01-02 16:30:00	1407.28	-284.761	11.2676	-17.909
2013-12-27 19:35:00	1047.74	-396.5	28.8			2014-01-02 17:00:00	-19.8113			2014-01-02 17:00:00	1022.07	-396.057	20.5528	-21.942			2014-01-02 17:30:00	1408.11	-283.782	11.2818	-18.244
2013-12-27 20:27:00	909.733	-396.7	25.2			2014-01-02 18:00:00	-20.0764			2014-01-02 18:00:00	1021.79	-395.606	20.4091	-22.193			2014-01-02 18:30:00	1398.44	-282.965	11.2648	-18.765
2013-12-27 21:00:00	851.21	-405.9	27.9			2014-01-02 19:00:00	-20.932			2014-01-02 19:00:00	1016.13	-395.225	20.3331	-22.635			2014-01-02 19:30:00	1384.12	-282.012	11.2389	-19.416
2013-12-27 21:33:00	769.403	-412.3	31.3			2014-01-02 20:00:00	-22.2379			2014-01-02 20:00:00	1007.13	-395.501	20.1895	-23.176			2014-01-02 20:30:00	1371.45	-280.785	11.2065	-20.13
2013-12-27 22:18:00	674.778	-414.4	32.9			2014-01-02 21:00:00	-23.6636			2014-01-02 21:00:00	995.581	-397.211	20.3627	-23.794			2014-01-02 21:30:00	1362.55	-279.384	11.0759	-20.829
2013-12-27 22:51:00	616.54	-413.5	35.9			2014-01-02 22:00:00	-24.8718			2014-01-02 22:00:00	986.171	-399.43	20.418	-24.427			2014-01-02 22:30:00	1358.23	-277.611	10.9524	-21.453
2013-12-27 23:24:00	573.451	-410.2	38.7			2014-01-02 23:00:00	-25.972			2014-01-02 23:00:00	996.501	-399.553	20.441	-24.972			2014-01-02 23:30:00	1358.53	-275.396	10.7142	-21.966
2013-12-28 00:09:00	548.343	-406.9	36.2			2014-01-03	-26.8833			2014-01-03	1011.5	-400.543	20.3179	-25.441			2014-01-03 00:30:00	1363.2	-272.749	10.4619	-22.357
2013-12-28 00:42:00	522.904	-409.9	24.3			2014-01-03 01:00:00	-27.3513			2014-01-03 01:00:00	1029.66	-401.106	20.7526	-25.761			2014-01-03 01:30:00	1371.88	-269.774	10.1663	-22.645
2013-12-28 01:15:00	482.255	-411.3	39.3			2014-01-03 02:00:00	-27.9375			2014-01-03 02:00:00	1054.51	-402.005	21.2357	-25.99			2014-01-03 02:30:00	1383.98	-266.58	9.88512	-22.828
2013-12-28 02:00:00	451.632	-422.5	47.8			2014-01-03 03:00:00	-27.2434			2014-01-03 03:00:00	1084.31	-401.991	21.4664	-26.035			2014-01-03 03:30:00	1404.64	-263.128	9.56741	-22.907
2013-12-28 02:35:00	430.61	-421.1	53.4			2014-01-03 04:00:00	-24.7298			2014-01-03 04:00:00	1026.77	-409.665	23.1993	-25.95			2014-01-03 04:30:00	1426.78	-260.013	9.28697	-22.837
2013-12-28 03:06:00	427.646	-425.3	48.7			2014-01-03 05:00:00	-23.4415			2014-01-03 05:00:00	1036.44	-409.385	23.3915	-25.592			2014-01-03 05:30:00	1430.08	-258.28	9.01635	-22.573
2013-12-28 03:51:00	435.736	-426.9	63.8			2014-01-03 06:00:00	-22.8126			2014-01-03 06:00:00	1047.49	-409.668	23.3893	-25.187			2014-01-03 06:30:00	1432.52	-256.725	8.77877	-22.113
2013-12-28 04:57:00	450.817	-435.1	51			2014-01-03 07:00:00	-22.0651			2014-01-03 07:00:00	1066.43	-407.98	23.2142	-24.546			2014-01-03 07:30:00	1439.9	-255.071	8.5885	-21.479
2013-12-28 05:42:00	476.851	-438.2	47.2			2014-01-03 08:00:00	-21.1659			2014-01-03 08:00:00	1104.42	-402.285	22.8225	-23.885			2014-01-03 08:30:00	1453.41	-253.325	8.36897	-20.728
2013-12-28 06:15:00	498.532	-437.1	39.2			2014-01-03 09:00:00	-21.0505			2014-01-03 09:00:00	1152.97	-399.034	22.5511	-23.071			2014-01-03 09:30:00	1474.4	-251.434	8.18102	-19.962
2013-12-28 06:48:00	530.828	-432.7	43.2			2014-01-03 10:00:00	-20.8033			2014-01-03 10:00:00	1200.49	-396.453	22.3394	-22.316			2014-01-03 10:30:00	1505.95	-249.328	8.04782	-19.326
2013-12-28 07:33:00	590.665	-428.7	45.2			2014-01-03 11:00:00	-20.4202			2014-01-03 11:00:00	1250.47	-394.123	22.5155	-21.573			2014-01-03 11:30:00	1551.43	-247.346	7.93253	-18.883
2013-12-28 08:06:00	648.287	-427.8	45.1			2014-01-03 12:00:00	-19.8325			2014-01-03 12:00:00	1305.56	-392.179	22.966	-20.958			2014-01-03 12:30:00	1588.15	-245.812	7.75178	-18.499
2013-12-28 08:39:00	697.248	-425.1	42.9			2014-01-03 13:00:00	-19.4841			2014-01-03 13:00:00	1353.63	-390.644	21.9489	-20.476			2014-01-03 13:30:00	1624.16	-244.805	7.61744	-18.204
2013-12-28 09:24:00	850.483	-412.8	27.1			2014-01-03 14:00:00	-19.5016			2014-01-03 14:00:00	1395.62	-389.329	21.525	-20.1			2014-01-03 14:30:00	1655.5	-244.148	7.57742	-18.005
2013-12-28 09:57:00	946.459	-410.7	23			2014-01-03 15:00:00	-19.323			2014-01-03 15:00:00	1427.56	-388.462	21.7494	-19.945			2014-01-03 15:30:00	1676.15	-243.903	7.54537	-17.949
2013-12-28 10:30:00	947.74	-419.3	30.8			2014-01-03 16:00:00	-19.398			2014-01-03 16:00:00	1446.19	-388.25	21.8428	-19.891			2014-01-03 16:30:00	1679.86	-244.223	7.44409	-18.181
2013-12-28 11:15:00	962.929	-425.9	38.6			2014-01-03 17:00:00	-19.3834			2014-01-03 17:00:00	1449.39	-388.442	21.8037	-20.144			2014-01-03 17:30:00	1665.62	-245.349	7.44341	-18.697
2013-12-28 11:48:00	972.697	-428.5	44.5			2014-01-03 18:00:00	-19.3723			2014-01-03 18:00:00	1437.51	-389.814	22.9435	-20.506			2014-01-03 18:30:00	1645.28	-247.125	7.4796	-19.382
2013-12-28 12:21:00	1009.75	-426.9	47.7			2014-01-03 19:00:00	-19.6482			2014-01-03 19:00:00	1402.94	-393.86	23.7004	-21.095			2014-01-03 19:30:00	1618.31	-249.343	7.49132	-20.134
2013-12-29 11:56:00	832.475	-407.5	21.7			2014-01-03 20:00:00	-20.2992			2014-01-03 20:00:00	1341.03	-396.527	23.3242	-21.68			2014-01-03 20:30:00	1586.06	-251.798	7.46211	-20.875
2013-12-29 12:29:00	796.343	-409.8	22.6			2014-01-03 21:00:00	-22.8362			2014-01-03 21:00:00	1249.11	-398.774	22.5246	-22.371			2014-01-03 21:30:00	1551.37	-254.364	7.49428	-21.55
2013-12-29 13:02:00	801.86	-409.4	21.9			2014-01-03 22:00:00	-24.9021			2014-01-03 22:00:00	1141.46	-402.292	23.1528	-23.033			2014-01-03 22:30:00	1514.7	-257.029	7.45865	-22.134
2013-12-29 13:47:00	814.565	-411.4	21.4			2014-01-03 23:00:00	-25.8984			2014-01-03 23:00:00	1043.25	-410.338	25.9724	-23.722			2014-01-03 23:30:00	1476.6	-259.791	7.42571	-22.608
2013-12-29 14:20:00	808.104	-406.7	21.2			2014-01-04	-28.5798			2014-01-04	968.991	-425.07	30.6697	-24.351			2014-01-04 00:30:00	1436.95	-262.69	7.40785	-22.97
2013-12-29 14:53:00	824.846	-403	20.1			2014-01-04 01:00:00	-29.7018			2014-01-04 01:00:00	916.73	-445.125	35.8617	-24.888			2014-01-04 01:30:00	1396.58	-265.68	7.33725	-23.224
2013-12-29 15:38:00	869.423	-389.6	16			2014-01-04 02:00:00	-29.5092			2014-01-04 02:00:00	877.677	-465.296	39.831	-25.316			2014-01-04 02:30:00	1356.29	-268.671	7.28157	-23.332
2013-12-29 16:11:00	906.25	-383.6	16.2			2014-01-04 03:00:00	-29.1428			2014-01-04 03:00:00	850.249	-479.269	40.5615	-25.542			2014-01-04 03:30:00	1316.82	-271.581	7.24725	-23.254
2013-12-29 16:44:00	931.659	-382.7	17.2			2014-01-04 04:00:00	-28.7597			2014-01-04 04:00:00	834.217	-483.421	38.3342	-25.631			2014-01-04 04:30:00	1280.02	-274.255	7.25225	-22.983
2013-12-29 17:29:00	951.371	-380.4	18.1			2014-01-04 05:00:00	-27.7857			2014-01-04 05:00:00	830.307	-480.236	33.0331	-25.506			2014-01-04 05:30:00	1249.57	-276.461	7.21284	-22.527
2013-12-29 18:02:00	951.905	-382.4	16.6			2014-01-04 06:00:00	-26.9172			2014-01-04 06:00:00	837.602	-474.188	29.0969	-25.244			2014-01-04 06:30:00	1229.5	-277.904	7.16552	-21.926
2013-12-29 18:35:00	935.592	-390	19.2			2014-01-04 07:00:00	-25.8531			2014-01-04 07:00:00	856.981	-470.544	31.8875	-24.797			2014-01-04 07:30:00	1223.88	-278.231	7.13931	-21.257
2013-12-29 19:20:00	860.877	-395.9	15.8			2014-01-04 08:00:00	-24.7221			2014-01-04 08:00:00	888.078	-470.202	37.8796	-24.257			2014-01-04 08:30:00	1237.29	-277.544	7.16178	-20.588
2013-12-29 19:53:00	781.066	-397.7	19.7			2014-01-04 09:00:00	-23.5633			2014-01-04 09:00:00	929.252	-472.842	38.1466	-23.633			2014-01-04 09:30:00	1272.69	-276.094	7.19766	-19.991
2013-12-29 20:26:00	704.974	-401.8	22.2			2014-01-04 10:00:00	-22.4528			2014-01-04 10:00:00	973.638	-473.423	34.8903	-22.98			2014-01-04 10:30:00	1329.56	-273.987	7.25968	-19.497
2013-12-29 21:11:00	611.058	-408.7	32.9			2014-01-04 11:00:00	-21.168			2014-01-04 11:00:00	1015.9	-469.848	34.2665	-22.35			2014-01-04 11:30:00	1369.08	-272.321	7.27543	-19.056
2013-12-29 21:44:00	551.822	-413.8	44			2014-01-04 12:00:00	-20.3841			2014-01-04 12:00:00	1049.58	-464.044	33.9022	-21.775			2014-01-04 12:30:00	1410.27	-270.55	7.28251	-18.687
2013-12-29 22:17:00	510.922	-420.2	33.4			2014-01-04 13:00:00	-19.8174			2014-01-04 13:00:00	1072.48	-458.009	32.5074	-21.329			2014-01-04 13:30:00	1450.64	-269.05	7.27297	-18.415
2013-12-30 05:40:00	417.883	-438.9	51.8			2014-01-04 14:00:00	-19.3703			2014-01-04 14:00:00	1089.36	-452.3	31.0057	-21.004			2014-01-04 14:30:00	1487.35	-267.977	7.3204	-18.238
2013-12-30 06:26:00	439.611	-437.3	48			2014-01-04 15:00:00	-19.0625			2014-01-04 15:00:00	1102.11	-447.15	30.6789	-20.882			2014-01-04 15:30:00	1511.31	-267.51	7.34175	-18.169
2013-12-30 06:59:00	460.072	-434.6	51.1			2014-01-04 16:00:00	-18.8718			2014-01-04 16:00:00	1111.83	-442.575	30.0788	-20.909			2014-01-04 16:30:00	1522.51	-267.613	7.42008	-18.27
2013-12-30 07:34:00	494.292	-426.6	42.8			2014-01-04 17:00:00	-18.9336			2014-01-04 17:00:00	1115.19	-439.545	29.475	-21.135			2014-01-04 17:30:00	1515.9	-268.446	7.46686	-18.647
2013-12-30 08:18:00	532.135	-418.3	45.5			2014-01-04 18:00:00	-19.598			2014-01-04 18:00:00	1111.68	-437.652	29.2458	-21.49			2014-01-04 18:30:00	1486.18	-270.151	7.50916	-19.245
2013-12-30 08:50:00	571.176	-417.3	49.6			2014-01-04 19:00:00	-21.0469			2014-01-04 19:00:00	1100.62	-436.981	29.3752	-21.999			2014-01-04 19:30:00	1445.57	-272.51	7.56516	-19.956
2013-12-30 09:23:00	626.858	-415.9	38			2014-01-04 20:00:00	-22.9187			2014-01-04 20:00:00	1083.77	-438.625	29.7145	-22.575			2014-01-04 20:30:00	1400.54	-275.256	7.65887	-20.683
2013-12-30 10:08:00	712.818	-408	35.3			2014-01-04 21:00:00	-24.4885			2014-01-04 21:00:00	1063.96	-442.636	29.3739	-23.236			2014-01-04 21:30:00	1353.72	-278.261	7.7582	-21.36
2013-12-30 10:41:00	764.042	-399.6	27.1			2014-01-04 22:00:00	-25.792			2014-01-04 22:00:00	1040.31	-450.051	29.029	-23.89			2014-01-04 22:30:00	1306.58	-281.466	7.84608	-21.962
2013-12-30 11:14:00	839.398	-390.4	21.8			2014-01-04 23:00:00	-26.8692			2014-01-04 23:00:00	1009.53	-459.333	29.4308	-24.511			2014-01-04 23:30:00	1260.33	-284.833	7.97969	-22.461
2013-12-30 12:09:00	940.595	-385.4	19			2014-01-05	-27.7872			2014-01-05	973.793	-469.403	30.4628	-25.087			2014-01-05 00:30:00	1215.54	-288.351	8.11049	-22.842
2013-12-30 12:42:00	997.287	-382.4	16.3			2014-01-05 01:00:00	-28.3438			2014-01-05 01:00:00	937.431	-482.944	31.0632	-25.537			2014-01-05 01:30:00	1173.18	-291.942	8.2936	-23.093
2013-12-30 13:15:00	1018.78	-380.3	20			2014-01-05 02:00:00	-28.7338			2014-01-05 02:00:00	900.481	-495.41	33.5554	-25.908			2014-01-05 02:30:00	1134.48	-295.497	8.47171	-23.192
2013-12-30 14:00:00	1050.26	-376	17.7			2014-01-05 03:00:00	-28.7354			2014-01-05 03:00:00	869.46	-504.075	37.1973	-26.066			2014-01-05 03:30:00	1100.78	-298.889	8.66899	-23.118
2013-12-30 14:33:00	1046.64	-372.6	15.3			2014-01-05 04:00:00	-28.4603			2014-01-05 04:00:00	847.966	-511.658	41.3376	-26.111			2014-01-05 04:30:00	1073.91	-301.922	8.89752	-22.855
2013-12-30 15:06:00	1039.08	-375.3	17.8			2014-01-05 05:00:00	-27.8843			2014-01-05 05:00:00	838.885	-517.287	44.1066	-25.912			2014-01-05 05:30:00	1056.34	-304.313	9.14226	-22.407
2013-12-30 15:51:00	1022.81	-375.7	17.5			2014-01-05 06:00:00	-26.9528			2014-01-05 06:00:00	843.199	-518.648	44.8274	-25.586			2014-01-05 06:30:00	1051.63	-305.802	9.36714	-21.809
2013-12-30 16:24:00	1042.36	-375.2	18.8			2014-01-05 07:00:00	-25.6046			2014-01-05 07:00:00	861.756	-512.386	43.8631	-25.084			2014-01-05 07:30:00	1064.38	-306.004	9.64707	-21.133
2013-12-30 16:57:00	1007.69	-374.9	12.9			2014-01-05 08:00:00	-24.1941			2014-01-05 08:00:00	889.918	-497.912	40.9717	-24.48			2014-01-05 08:30:00	1098.12	-304.678	9.80362	-20.442
2013-12-30 17:42:00	1022.92	-375	23			2014-01-05 09:00:00	-22.6779			2014-01-05 09:00:00	926.286	-481.173	41.5724	-23.769			2014-01-05 09:30:00	1153.75	-301.932	9.98482	-19.794
2013-12-30 18:15:00	1024.44	-378.6	30			2014-01-05 10:00:00	-21.1579			2014-01-05 10:00:00	965.376	-466.658	36.866	-23.042			2014-01-05 10:30:00	1228.22	-298.184	10.135	-19.226
2013-12-30 18:48:00	1012.8	-381.8	32.4			2014-01-05 11:00:00	-19.7438			2014-01-05 11:00:00	1002.06	-452.848	31.4494	-22.356			2014-01-05 11:30:00	1302.91	-294.617	10.2118	-18.734
2013-12-30 19:33:00	1008.02	-384.5	29			2014-01-05 12:00:00	-19.3097			2014-01-05 12:00:00	1041.67	-439.75	27.6614	-21.746			2014-01-05 12:30:00	1355.07	-292.074	10.2541	-18.309
2013-12-30 20:06:00	915.968	-393.6	31.3			2014-01-05 13:00:00	-18.8234			2014-01-05 13:00:00	1087.77	-427.183	24.5959	-21.273			2014-01-05 13:30:00	1426.4	-288.654	10.2534	-17.984
2013-12-30 20:39:00	876.631	-393.3	30.1			2014-01-05 14:00:00	-18.4102			2014-01-05 14:00:00	1131.81	-417.131	23.1902	-20.866			2014-01-05 14:30:00	1464.79	-286.424	10.2685	-17.741
2013-12-30 21:24:00	745.3	-394	25.9			2014-01-05 15:00:00	-18.0264			2014-01-05 15:00:00	1172.13	-409.989	22.5145	-20.645			2014-01-05 15:30:00	1503.75	-284.224	10.2419	-17.681
2013-12-30 21:57:00	711.824	-404.3	25			2014-01-05 16:00:00	-17.8664			2014-01-05 16:00:00	1208.78	-404.752	22.02	-20.577			2014-01-05 16:30:00	1535.54	-282.436	10.2066	-17.85
2013-12-30 22:30:00	645.952	-409.5	30.1			2014-01-05 17:00:00	-18.1413			2014-01-05 17:00:00	1236.82	-401.306	21.4172	-20.746			2014-01-05 17:30:00	1540.41	-281.536	10.1965	-18.251
2013-12-30 23:15:00	637.311	-421.5	28.2			2014-01-05 18:00:00	-18.7997			2014-01-05 18:00:00	1254.29	-399.097	20.3749	-21.035			2014-01-05 18:30:00	1529.25	-281.118	10.1621	-18.833
2013-12-30 23:48:00	617.791	-420.1	37.8			2014-01-05 19:00:00	-20.0833			2014-01-05 19:00:00	1259.64	-397.487	19.3093	-21.509			2014-01-05 19:30:00	1513.7	-280.9	10.169	-19.505
2013-12-31 00:21:00	577.246	-419.3	41.1			2014-01-05 20:00:00	-21.6843			2014-01-05 20:00:00	1262.77	-396.188	17.9771	-22.031			2014-01-05 20:30:00	1497.23	-280.742	10.1497	-20.193
2013-12-31 01:06:00	536.435	-436.8	37.7			2014-01-05 21:00:00	-23.0989			2014-01-05 21:00:00	1295.9	-394.162	18.0516	-22.385			2014-01-05 21:30:00	1481.87	-280.445	10.0991	-20.833
2013-12-31 01:39:00	530.921	-438.4	38.4			2014-01-05 22:00:00	-24.6064			2014-01-05 22:00:00	1255.23	-399.396	20.215	-22.722			2014-01-05 22:30:00	1470.28	-279.932	10.019	-21.397
2013-12-31 02:12:00	509.439	-433.2	52.4			2014-01-05 23:00:00	-26.2346			2014-01-05 23:00:00	1204.53	-406.729	22.0298	-23.019			2014-01-05 23:30:00	1460.46	-279.311	9.9331	-21.864
2013-12-31 02:57:00	513.611	-437.9	45.4			2014-01-06	-27.6492			2014-01-06	1155.96	-413.595	23.6323	-23.305			2014-01-06 00:30:00	1453.81	-278.602	9.79268	-22.228
2013-12-31 03:30:00	513.611	-435.7	50.7			2014-01-06 01:00:00	-28.0098			2014-01-06 01:00:00	1116.78	-419.53	25.3448	-23.584			2014-01-06 01:30:00	1446.66	-278.02	9.69679	-22.484
2013-12-31 04:03:00	500.931	-437.2	51.5			2014-01-06 02:00:00	-28.5195			2014-01-06 02:00:00	1086.62	-424.39	26.5556	-23.823			2014-01-06 02:30:00	1437.02	-277.687	9.6122	-22.601
2013-12-31 04:48:00	572.597	-435.5	49.9			2014-01-06 03:00:00	-28.3226			2014-01-06 03:00:00	1062.77	-429.385	27.4027	-23.94			2014-01-06 03:30:00	1423.63	-277.633	9.52713	-22.556
2013-12-31 05:21:00	580.856	-436.3	44.6			2014-01-06 04:00:00	-27.9434			2014-01-06 04:00:00	1041.81	-434.971	28.1367	-24.004			2014-01-06 04:30:00	1406.99	-277.728	9.477	-22.331
2013-12-31 05:54:00	590.76	-434.2	40.8			2014-01-06 05:00:00	-27.011			2014-01-06 05:00:00	1033.6	-439.404	28.6588	-23.895			2014-01-06 05:30:00	1391.18	-277.691	9.40917	-21.931
2013-12-31 06:39:00	632.37	-434.5	39.3			2014-01-06 06:00:00	-26.2813			2014-01-06 06:00:00	1035.6	-441.952	28.8482	-23.728			2014-01-06 06:30:00	1380.72	-277.295	9.3728	-21.375
2013-12-31 07:12:00	660.379	-432.9	33.6			2014-01-06 07:00:00	-25.2498			2014-01-06 07:00:00	1059.2	-441.615	29.2415	-23.367			2014-01-06 07:30:00	1379.97	-276.251	9.35057	-20.714
2013-12-31 07:45:00	700.811	-429.3	34.8			2014-01-06 08:00:00	-23.7956			2014-01-06 08:00:00	1098.38	-436.931	29.177	-22.9			2014-01-06 08:30:00	1393.37	-274.277	9.31351	-20.025
2013-12-31 08:30:00	762.123	-424.6	40.5			2014-01-06 09:00:00	-22.2118			2014-01-06 09:00:00	1154.68	-430.636	28.5649	-22.293			2014-01-06 09:30:00	1427.32	-271.521	9.24798	-19.398
2013-12-31 09:03:00	823.405	-422.7	26.3			2014-01-06 10:00:00	-21.4111			2014-01-06 10:00:00	1214.85	-423.888	27.6487	-21.634			2014-01-06 10:30:00	1486.66	-268.188	9.15561	-18.885
2013-12-31 09:36:00	865.356	-421	29.5			2014-01-06 11:00:00	-20.8436			2014-01-06 11:00:00	1272.54	-416.833	26.5282	-20.974			2014-01-06 11:30:00	1545.33	-264.772	9.06049	-18.429
2013-12-31 10:21:00	945.606	-417.8	21.5			2014-01-06 12:00:00	-20.0241			2014-01-06 12:00:00	1333.91	-410.885	25.4841	-20.376			2014-01-06 12:30:00	1605.64	-261.708	8.9663	-18.051
2013-12-31 10:54:00	1005.52	-414.8	24.8			2014-01-06 13:00:00	-19.707			2014-01-06 13:00:00	1384.13	-405.912	24.5464	-19.937			2014-01-06 13:30:00	1642.96	-259.648	8.82339	-17.745
2013-12-31 11:25:00	1044.23	-411.7	24.7			2014-01-06 14:00:00	-19.2787			2014-01-06 14:00:00	1422.61	-402.1	23.7276	-19.595			2014-01-06 14:30:00	1679.36	-257.807	8.70268	-17.552
2013-12-31 12:22:00	1129.68	-406.8	22.3			2014-01-06 15:00:00	-19.2466			2014-01-06 15:00:00	1444.08	-400.035	23.0987	-19.449			2014-01-06 15:30:00	1707.54	-256.086	8.62648	-17.486
2013-12-31 12:55:00	1162.1	-405	22.5			2014-01-06 16:00:00	-19.3275			2014-01-06 16:00:00	1452.87	-399.372	22.5495	-19.406			2014-01-06 16:30:00	1741.18	-253.92	8.4784	-17.635
2013-12-31 13:28:00	1210.87	-403.6	22.1			2014-01-06 17:00:00	-19.4457			2014-01-06 17:00:00	1456.68	-398.932	21.7972	-19.537			2014-01-06 17:30:00	1754.95	-252.456	8.37536	-18.037
2013-12-31 14:13:00	1230.36	-404.4	19.7			2014-01-06 18:00:00	-19.7564			2014-01-06 18:00:00	1453.78	-397.901	20.9915	-19.756			2014-01-06 18:30:00	1754.34	-251.723	8.23908	-18.661
2013-12-31 14:46:00	1247.63	-406.2	19.6			2014-01-06 19:00:00	-19.9028			2014-01-06 19:00:00	1439.51	-397.363	20.3685	-20.146			2014-01-06 19:30:00	1741.55	-251.4	8.06802	-19.364
2013-12-31 15:19:00	1237.49	-405.5	21.6			2014-01-06 20:00:00	-20.1733			2014-01-06 20:00:00	1419.59	-397.376	19.9673	-20.628			2014-01-06 20:30:00	1721.75	-251.406	7.89566	-20.073
2013-12-31 16:04:00	1235.88	-406.6	18.7			2014-01-06 21:00:00	-21.7703			2014-01-06 21:00:00	1393.41	-398.095	19.789	-21.188			2014-01-06 21:30:00	1695.1	-251.854	7.74719	-20.729
2013-12-31 16:37:00	1222.32	-404.9	21.9			2014-01-06 22:00:00	-22.2333			2014-01-06 22:00:00	1362.14	-399.105	19.8448	-21.701			2014-01-06 22:30:00	1662.55	-252.725	7.56917	-21.291
2013-12-31 17:10:00	1233.69	-408.8	23			2014-01-06 23:00:00	-24.1367			2014-01-06 23:00:00	1327.14	-399.411	20.4235	-22.155			2014-01-06 23:30:00	1626.88	-253.889	7.46983	-21.751
2013-12-31 17:55:00	1222.78	-410.8	21.1			2014-01-07	-24.281			2014-01-07	1297.14	-399.833	21.4418	-22.546			2014-01-07 00:30:00	1589.84	-255.237	7.27995	-22.103
2013-12-31 18:28:00	1165.04	-411.4	19.9			2014-01-07 01:00:00	-23.1918			2014-01-07 01:00:00	1267.55	-401.883	22.8373	-22.892			2014-01-07 01:30:00	1552.91	-256.701	7.15318	-22.326
2013-12-31 19:01:00	1111.46	-414.5	22			2014-01-07 02:00:00	-23.2089			2014-01-07 02:00:00	1227.45	-404.199	23.9885	-23.181			2014-01-07 02:30:00	1516.92	-258.213	6.96889	-22.408
2013-12-31 19:46:00	1019.87	-420.1	25.9			2014-01-07 03:00:00	-23.1915			2014-01-07 03:00:00	1188.69	-406.647	25.1818	-23.331			2014-01-07 03:30:00	1483.35	-259.686	6.83378	-22.343
2013-12-31 20:19:00	955.968	-424.2	20			2014-01-07 04:00:00	-25.9025			2014-01-07 04:00:00	1159.84	-408.953	26.1381	-23.436			2014-01-07 04:30:00	1454.61	-260.959	6.71427	-22.123
2013-12-31 20:52:00	896.033	-425.8	25.1			2014-01-07 05:00:00	-24.8161			2014-01-07 05:00:00	1135.37	-412.41	26.1456	-23.403			2014-01-07 05:30:00	1433.02	-261.865	6.62087	-21.744
2013-12-31 21:37:00	847.579	-432.1	30.8			2014-01-07 06:00:00	-23.0275			2014-01-07 06:00:00	1120.7	-418.707	24.4788	-23.325			2014-01-07 06:30:00	1420.5	-262.291	6.5963	-21.229
2013-12-31 22:10:00	807.694	-434.3	36.2			2014-01-07 07:00:00	-21.967			2014-01-07 07:00:00	1124.97	-420.176	25.9098	-23.096			2014-01-07 07:30:00	1420.37	-262.04	6.53517	-20.646
2013-12-31 22:43:00	888.994	-429.7	32.7			2014-01-07 08:00:00	-21.9172			2014-01-07 08:00:00	1145.61	-420.82	25.9385	-22.741			2014-01-07 08:30:00	1436.79	-260.837	6.51578	-20.069
2013-12-31 23:28:00	771.631	-433	42.4			2014-01-07 09:00:00	-22.448			2014-01-07 09:00:00	1178.68	-420.508	26.2754	-22.3			2014-01-07 09:30:00	1473.82	-258.986	6.53141	-19.565
2014-01-01 00:01:00	724.373	-442.4	38.7			2014-01-07 10:00:00	-22.0536			2014-01-07 10:00:00	1196.35	-417.553	26.5264	-21.815			2014-01-07 10:30:00	1516.08	-257.687	6.56993	-19.087
2014-01-01 00:34:00	680.38	-442.1	45.5			2014-01-07 11:00:00	-21.2008			2014-01-07 11:00:00	1207.77	-414.557	25.987	-21.365			2014-01-07 11:30:00	1552.42	-257.172	6.59353	-18.636
2014-01-01 01:19:00	649.845	-440.3	41.5			2014-01-07 12:00:00	-20.5164			2014-01-07 12:00:00	1203.07	-414.699	26.3519	-20.923			2014-01-07 12:30:00	1593.05	-256.787	6.64767	-18.265
2014-01-01 01:52:00	635.76	-446.6	42.4			2014-01-07 13:00:00	-20.0454			2014-01-07 13:00:00	1200.89	-413.81	26.1852	-20.55			2014-01-07 13:30:00	1630.96	-256.242	6.68305	-17.971
2014-01-01 02:25:00	612.115	-449.8	39.4			2014-01-07 14:00:00	-19.6284			2014-01-07 14:00:00	1194.98	-412.548	25.7334	-20.24			2014-01-07 14:30:00	1648.62	-256.127	6.66031	-17.758
2014-01-01 03:10:00	610.097	-443.5	51.4			2014-01-07 15:00:00	-19.3202			2014-01-07 15:00:00	1202.61	-408.785	24.8161	-20.097			2014-01-07 15:30:00	1679.62	-255.42	6.6121	-17.685
2014-01-01 03:43:00	629.661	-440	33			2014-01-07 16:00:00	-19.0674			2014-01-07 16:00:00	1227.58	-403.18	23.7308	-20.066			2014-01-07 16:30:00	1716.57	-254.14	6.6668	-17.815
2014-01-01 04:16:00	657.449	-437.4	34.6			2014-01-07 17:00:00	-18.9279			2014-01-07 17:00:00	1241.86	-397.763	22.7688	-20.198			2014-01-07 17:30:00	1745.8	-253.011	6.64906	-18.183
2014-01-01 05:01:00	698.336	-434.8	17.2			2014-01-07 18:00:00	-19.2479			2014-01-07 18:00:00	1249.75	-392.753	22.1579	-20.475			2014-01-07 18:30:00	1748.15	-253.128	6.65123	-18.734
2014-01-01 05:34:00	707.553	-432.8	13.5			2014-01-07 19:00:00	-20.1811			2014-01-07 19:00:00	1250.98	-388.318	21.8171	-20.891			2014-01-07 19:30:00	1736.79	-253.818	6.59927	-19.376
2014-01-01 06:07:00	747.109	-439.8	14.3			2014-01-07 20:00:00	-22.2667			2014-01-07 20:00:00	1252.58	-384.336	21.4454	-21.371			2014-01-07 20:30:00	1720.46	-254.753	6.59536	-20.037
2014-01-01 06:52:00	860.669	-429	9.4			2014-01-07 21:00:00	-23.979			2014-01-07 21:00:00	1252.69	-381.781	20.3222	-21.96			2014-01-07 21:30:00	1700.19	-255.932	6.58375	-20.652
2014-01-01 07:25:00	936.656	-422.1	14			2014-01-07 22:00:00	-25.589			2014-01-07 22:00:00	1247.75	-381.059	20.9274	-22.54			2014-01-07 22:30:00	1677.04	-257.329	6.60756	-21.183
2014-01-01 07:58:00	996.638	-417.6	18.5			2014-01-07 23:00:00	-26.2733			2014-01-07 23:00:00	1233.92	-381.16	22.3488	-23.082			2014-01-07 23:30:00	1652.44	-258.873	6.66193	-21.609
2014-01-01 08:43:00	1078.36	-411.9	20			2014-01-08	-26.9644			2014-01-08	1205.68	-381.272	23.5438	-23.569			2014-01-08 00:30:00	1627.32	-260.495	6.72386	-21.926
2014-01-01 09:16:00	1140.01	-410.3	20.4			2014-01-08 01:00:00	-27.7661			2014-01-08 01:00:00	1159.82	-380.521	25.0056	-23.93			2014-01-08 01:30:00	1602.93	-262.129	6.79622	-22.132
2014-01-01 09:49:00	1196.82	-408.8	19.5			2014-01-08 02:00:00	-28.6757			2014-01-08 02:00:00	1098.73	-379.89	25.2802	-24.243			2014-01-08 02:30:00	1580.05	-263.718	6.87274	-22.216
2014-01-01 10:34:00	1264.98	-404	23.5			2014-01-08 03:00:00	-28.4905			2014-01-08 03:00:00	1034.89	-381.299	23.1149	-24.372			2014-01-08 03:30:00	1558.63	-265.217	6.99157	-22.163
2014-01-01 11:07:00	1313.23	-403.2	21.6			2014-01-08 04:00:00	-27.621			2014-01-08 04:00:00	976.598	-391.295	20.8557	-24.441			2014-01-08 04:30:00	1536.54	-266.645	7.12134	-21.944
2014-01-01 11:46:00	1368.92	-401	24.1			2014-01-08 05:00:00	-26.0648			2014-01-08 05:00:00	940.799	-413.023	23.4497	-24.327			2014-01-08 05:30:00	1516.49	-267.899	7.24562	-21.544
2014-01-01 12:31:00	1449.43	-397.3	21.6			2014-01-08 06:00:00	-24.79			2014-01-08 06:00:00	932.176	-437.887	26.1928	-24.123			2014-01-08 06:30:00	1501.52	-268.867	7.39997	-20.977
2014-01-01 13:04:00	1486.94	-393.9	24.1			2014-01-08 07:00:00	-24.1275			2014-01-08 07:00:00	947.585	-453.798	28.5637	-23.762			2014-01-08 07:30:00	1492.75	-269.428	7.6089	-20.288
2014-01-01 13:36:00	1519.96	-394.9	20.8			2014-01-08 08:00:00	-23.0579			2014-01-08 08:00:00	978.455	-451.21	38.2141	-23.302			2014-01-08 08:30:00	1494.31	-269.338	7.79273	-19.539
2014-01-01 14:22:00	1519.47	-393.1	21			2014-01-08 09:00:00	-22.1187			2014-01-08 09:00:00	1018.06	-437.247	35.7371	-22.726			2014-01-08 09:30:00	1510.99	-268.596	7.92435	-18.802
2014-01-01 14:55:00	1520.7	-391.9	22.2			2014-01-08 10:00:00	-21.0267			2014-01-08 10:00:00	1065.9	-421.463	30.4165	-22.076			2014-01-08 10:30:00	1545.97	-267.572	8.12674	-18.157
2014-01-01 15:28:00	1589.7	-393.4	20.9			2014-01-08 11:00:00	-20.0449			2014-01-08 11:00:00	1109.51	-405.742	24.2195	-21.444			2014-01-08 11:30:00	1599.24	-266.202	8.27916	-17.643
2014-01-01 16:13:00	1627.34	-392.5	20.6			2014-01-08 12:00:00	-19.0625			2014-01-08 12:00:00	1139.71	-389.142	18.516	-20.846			2014-01-08 12:30:00	1660.89	-264.77	8.45718	-17.234
2014-01-01 16:46:00	1670.71	-393	19.5			2014-01-08 13:00:00	-18.2754			2014-01-08 13:00:00	1156.75	-376.079	18.3685	-20.386			2014-01-08 13:30:00	1695.1	-263.875	8.61882	-16.896
2014-01-01 17:19:00	1675.52	-393.8	21.2			2014-01-08 14:00:00	-17.727			2014-01-08 14:00:00	1172.53	-368.703	19.2006	-20.044			2014-01-08 14:30:00	1738.28	-263.136	8.76184	-16.711
2014-01-01 18:04:00	1599.18	-397.2	22.4			2014-01-08 15:00:00	-17.4169			2014-01-08 15:00:00	1187.12	-366.201	19.0854	-19.873			2014-01-08 15:30:00	1751.16	-262.984	8.86432	-16.71
2014-01-01 18:37:00	1582.36	-390.5	18.6			2014-01-08 16:00:00	-17.3684			2014-01-08 16:00:00	1202.88	-367.777	19.3383	-19.841			2014-01-08 16:30:00	1743.38	-263.212	8.94542	-16.948
2014-01-01 19:10:00	1586.21	-392.7	20.1			2014-01-08 17:00:00	-17.6187			2014-01-08 17:00:00	1212.66	-371.543	18.8191	-20.028			2014-01-08 17:30:00	1723.16	-263.727	9.03079	-17.406
2014-01-01 19:55:00	1414.39	-401.2	27.1			2014-01-08 18:00:00	-18.3892			2014-01-08 18:00:00	1217.5	-375.013	19.2014	-20.349			2014-01-08 18:30:00	1695.63	-264.514	9.15131	-18.027
2014-01-01 20:28:00	1255.49	-407.1	19.9			2014-01-08 19:00:00	-19.8984			2014-01-08 19:00:00	1212.18	-377.481	19.5932	-20.864			2014-01-08 19:30:00	1664.6	-265.581	9.28589	-18.741
2014-01-01 21:01:00	1129.12	-407.1	23.8			2014-01-08 20:00:00	-21.7185			2014-01-08 20:00:00	1198.37	-381.426	18.664	-21.464			2014-01-08 20:30:00	1633.51	-266.665	9.37956	-19.48
2014-01-01 21:46:00	1039.85	-415	15.4			2014-01-08 21:00:00	-23.3626			2014-01-08 21:00:00	1172.47	-387.724	19.8238	-22.15			2014-01-08 21:30:00	1604.46	-267.629	9.47216	-20.183
2014-01-01 22:19:00	964.644	-416.2	19			2014-01-08 22:00:00	-24.9036			2014-01-08 22:00:00	1135.75	-395.391	21.3575	-22.831			2014-01-08 22:30:00	1578.05	-268.456	9.54593	-20.806
2014-01-01 22:52:00	915.757	-421.4	22.3			2014-01-08 23:00:00	-26.2421			2014-01-08 23:00:00	1090.21	-403.691	24.6126	-23.479			2014-01-08 23:30:00	1554.18	-269.18	9.58023	-21.313
2014-01-01 23:37:00	831.444	-425.4	22.8			2014-01-09	-27.2339			2014-01-09	1040.58	-412.808	27.5714	-24.07			2014-01-09 00:30:00	1532.66	-269.832	9.60629	-21.704
2014-01-02 00:10:00	786.252	-429	21.1			2014-01-09 01:00:00	-28.0972			2014-01-09 01:00:00	993.306	-421.212	29.406	-24.548			2014-01-09 01:30:00	1512.26	-270.521	9.64595	-21.98
2014-01-02 00:43:00	726.17	-432.3	34.4			2014-01-09 02:00:00	-28.6639			2014-01-09 02:00:00	952.946	-427.151	30.0577	-24.941			2014-01-09 02:30:00	1492.29	-271.295	9.68075	-22.131
2014-01-02 01:28:00	687.569	-431.1	42.7			2014-01-09 03:00:00	-28.8161			2014-01-09 03:00:00	925.572	-429.452	29.8185	-25.162			2014-01-09 03:30:00	1472.99	-272.128	9.70872	-22.129
2014-01-02 02:01:00	651.111	-433.6	53.2			2014-01-09 04:00:00	-28.6846			2014-01-09 04:00:00	911.497	-429.082	29.4702	-25.264			2014-01-09 04:30:00	1455.02	-272.97	9.75891	-21.944
2014-01-02 02:34:00	624.83	-439.3	43.6			2014-01-09 05:00:00	-28.0539			2014-01-09 05:00:00	909.279	-426.15	29.7663	-25.173			2014-01-09 05:30:00	1439.16	-273.776	9.83055	-21.545
2014-01-02 03:19:00	602.806	-435.6	37.7			2014-01-09 06:00:00	-27.0031			2014-01-09 06:00:00	916.116	-421.879	28.8807	-24.954			2014-01-09 06:30:00	1426.87	-274.458	9.89847	-20.959
2014-01-02 03:52:00	608.177	-441.3	34			2014-01-09 07:00:00	-25.5116			2014-01-09 07:00:00	932.326	-415.37	29.1686	-24.552			2014-01-09 07:30:00	1420.11	-274.909	9.96052	-20.234
2014-01-02 04:25:00	594.484	-439.7	17.5			2014-01-09 08:00:00	-23.9795			2014-01-09 08:00:00	956.874	-406.938	28.5011	-24.035			2014-01-09 08:30:00	1420.69	-275.08	10.0345	-19.419
2014-01-02 05:10:00	617.213	-441.7	11.6			2014-01-09 09:00:00	-22.3356			2014-01-09 09:00:00	990.336	-399.15	26.4834	-23.418			2014-01-09 09:30:00	1430.52	-275.035	10.0778	-18.585
2014-01-02 05:43:00	639.93	-437.6	19.7			2014-01-09 10:00:00	-20.999			2014-01-09 10:00:00	1033.1	-392.768	24.2053	-22.761			2014-01-09 10:30:00	1452.39	-274.686	10.1198	-17.83
2014-01-02 06:16:00	668.501	-435.5	31.3			2014-01-09 11:00:00	-19.7051			2014-01-09 11:00:00	1080.83	-386.714	23.5856	-22.137			2014-01-09 11:30:00	1492.1	-273.803	10.1613	-17.247
2014-01-02 07:01:00	712.122	-433.9	28.6			2014-01-09 12:00:00	-18.8297			2014-01-09 12:00:00	1128.42	-380.992	22.3365	-21.559			2014-01-09 12:30:00	1557.33	-272.228	10.2032	-16.883
2014-01-02 07:34:00	754.355	-430.5	38.3			2014-01-09 13:00:00	-18.5933			2014-01-09 13:00:00	1169.4	-376.078	21.1752	-21.116			2014-01-09 13:30:00	1616.94	-270.917	10.2464	-16.633
2014-01-02 08:07:00	804.111	-432.8	30.5			2014-01-09 14:00:00	-18.4539			2014-01-09 14:00:00	1201.25	-372.043	20.3834	-20.786			2014-01-09 14:30:00	1649.73	-270.359	10.2656	-16.493
2014-01-02 08:52:00	889.519	-430.4	16.6			2014-01-09 15:00:00	-18.1152			2014-01-09 15:00:00	1221.13	-368.848	20.5208	-20.648			2014-01-09 15:30:00	1647.15	-270.812	10.2972	-16.589
2014-01-02 09:25:00	958.751	-425.4	19			2014-01-09 16:00:00	-17.8507			2014-01-09 16:00:00	1230.93	-365.764	21.2524	-20.651			2014-01-09 16:30:00	1628.79	-271.823	10.4068	-16.974
2014-01-02 09:58:00	1054.54	-422.2	21.6			2014-01-09 17:00:00	-18.0289			2014-01-09 17:00:00	1230.73	-363.209	21.6518	-20.858			2014-01-09 17:30:00	1609.13	-272.946	10.4245	-17.503
2014-01-02 10:43:00	1103.99	-421.2	23.3			2014-01-09 18:00:00	-18.6513			2014-01-09 18:00:00	1223.22	-362.414	21.511	-21.198			2014-01-09 18:30:00	1589.41	-274.132	10.5162	-18.081
2014-01-02 11:16:00	1168.43	-419.7	26.8			2014-01-09 19:00:00	-19.8849			2014-01-09 19:00:00	1207.3	-363.905	22.0807	-21.693			2014-01-09 19:30:00	1567.92	-275.424	10.5946	-18.674
2014-01-02 11:59:00	1167.41	-419.2	26			2014-01-09 20:00:00	-20.6198			2014-01-09 20:00:00	1183.63	-367.457	23.445	-22.266			2014-01-09 20:30:00	1544.92	-276.849	10.656	-19.263
2014-01-02 12:44:00	1179.76	-413.8	22.3			2014-01-09 21:00:00	-20.1477			2014-01-09 21:00:00	1154.16	-373.116	24.9767	-22.913			2014-01-09 21:30:00	1522.12	-278.301	10.7408	-19.881
2014-01-02 13:17:00	1198.19	-409.5	23.4			2014-01-09 22:00:00	-19.738			2014-01-09 22:00:00	1121.01	-380.408	26.7679	-23.553			2014-01-09 22:30:00	1500.63	-279.708	10.8035	-20.511
2014-01-02 13:50:00	1216.48	-413.3	23.9			2014-01-09 23:00:00	-19.3507			2014-01-09 23:00:00	1085.07	-388.62	28.951	-24.162			2014-01-09 23:30:00	1480.6	-281.059	10.8792	-21.074
2014-01-02 14:35:00	1168.54	-414.1	24.9			2014-01-10	-19.6149			2014-01-10	1047.08	-397.469	31.1348	-24.723			2014-01-10 00:30:00	1462.21	-282.338	10.9093	-21.548
2014-01-02 15:08:00	1191.81	-412.3	24.6			2014-01-10 01:00:00	-18.9503			2014-01-10 01:00:00	1010.22	-406.627	31.8178	-25.167			2014-01-10 01:30:00	1445.49	-283.544	10.9716	-21.893
2014-01-02 15:41:00	1245.9	-408.1	22.1			2014-01-10 02:00:00	-19.1892			2014-01-10 02:00:00	978.001	-416.281	33.1777	-25.534			2014-01-10 02:30:00	1430.56	-284.663	11.0104	-22.099
2014-01-02 16:26:00	1252.37	-409	20.4			2014-01-10 03:00:00	-19.7582			2014-01-10 03:00:00	956.167	-426.415	38.5198	-25.714			2014-01-10 03:30:00	1417.84	-285.66	11.0932	-22.152
2014-01-02 16:59:00	1279.72	-409.2	14.1			2014-01-10 04:00:00	-20.1251			2014-01-10 04:00:00	947.1	-434.609	39.5598	-25.788			2014-01-10 04:30:00	1407.74	-286.5	11.1015	-21.996
2014-01-02 17:32:00	1314.99	-409.2	20.7			2014-01-10 05:00:00	-19.97			2014-01-10 05:00:00	955.84	-439.495	41.355	-25.635			2014-01-10 05:30:00	1401	-287.14	11.1582	-21.54
2014-01-02 18:17:00	1296.97	-410.3	27.5			2014-01-10 06:00:00	-21.2392			2014-01-10 06:00:00	979.775	-439.033	42.0049	-25.345			2014-01-10 06:30:00	1399.69	-287.458	11.1839	-20.891
2014-01-02 18:50:00	1258.27	-411.8	27.7			2014-01-10 07:00:00	-20.1452			2014-01-10 07:00:00	1019.54	-434.871	38.5671	-24.857			2014-01-10 07:30:00	1406.64	-287.267	11.2166	-20.11
2014-01-02 19:23:00	1197.51	-414.2	28			2014-01-10 08:00:00	-18.3115			2014-01-10 08:00:00	1071.08	-429.343	35.2856	-24.26			2014-01-10 08:30:00	1424.97	-286.439	11.2324	-19.263
2014-01-02 20:08:00	1083.67	-416.2	20.3			2014-01-10 09:00:00	-17.5339			2014-01-10 09:00:00	1126.49	-424.773	32.5593	-23.564			2014-01-10 09:30:00	1457.26	-285.088	11.2118	-18.426
2014-01-02 20:41:00	1013.99	-420.1	19.8			2014-01-10 10:00:00	-16.9226			2014-01-10 10:00:00	1178.66	-420.743	31.2164	-22.847			2014-01-10 10:30:00	1505.34	-283.199	11.192	-17.673
2014-01-02 21:14:00	943.153	-422.2	31.2			2014-01-10 11:00:00	-16.4403			2014-01-10 11:00:00	1225.9	-415.847	30.6324	-22.16			2014-01-10 11:30:00	1568.99	-280.847	11.1679	-17.058
2014-01-02 21:59:00	876.631	-424.1	17.3			2014-01-10 12:00:00	-16.1421			2014-01-10 12:00:00	1270.75	-410.297	29.8271	-21.521			2014-01-10 12:30:00	1642.3	-278.321	11.0723	-16.6
2014-01-02 22:32:00	813.128	-426.1	18.1			2014-01-10 13:00:00	-16.0005			2014-01-10 13:00:00	1312.56	-405.682	28.683	-21.019			2014-01-10 13:30:00	1708.5	-276.171	11.0521	-16.289
2014-01-02 23:05:00	768.088	-423.5	33			2014-01-10 14:00:00	-15.7387			2014-01-10 14:00:00	1350.66	-402.351	28.2843	-20.638			2014-01-10 14:30:00	1753.1	-274.712	11.0487	-16.144
2014-01-02 23:50:00	713.315	-433.2	25.6			2014-01-10 15:00:00	-16.2797			2014-01-10 15:00:00	1379.61	-399.99	28.7147	-20.458			2014-01-10 15:30:00	1773.85	-273.919	11.024	-16.229
2014-01-03 00:23:00	694.282	-429	36.6			2014-01-10 16:00:00	-16.6152			2014-01-10 16:00:00	1396.26	-398.92	29.6728	-20.446			2014-01-10 16:30:00	1777.12	-273.579	11.0225	-16.575
2014-01-03 00:56:00	677.823	-433	42.8			2014-01-10 17:00:00	-16.6889			2014-01-10 17:00:00	1400.89	-399.197	30.6914	-20.663			2014-01-10 17:30:00	1770.82	-273.513	11.0477	-17.165
2014-01-03 01:41:00	637.02	-434.4	30.7			2014-01-10 18:00:00	-17.3272			2014-01-10 18:00:00	1397.78	-400.243	31.9604	-21.023			2014-01-10 18:30:00	1759.62	-273.651	11.0537	-17.802
2014-01-03 02:14:00	629.371	-432.9	38.2			2014-01-10 19:00:00	-18.8275			2014-01-10 19:00:00	1388.1	-402.041	32.7469	-21.552			2014-01-10 19:30:00	1745.69	-273.979	11.1023	-18.363
2014-01-03 02:47:00	613.653	-427.7	41.8			2014-01-10 20:00:00	-19.3962			2014-01-10 20:00:00	1371.69	-404.412	33.3693	-22.131			2014-01-10 20:30:00	1729.87	-274.443	11.1243	-18.926
2014-01-03 03:32:00	982.815	-396	29.4			2014-01-10 21:00:00	-21.6848			2014-01-10 21:00:00	1347.73	-406.936	33.2714	-22.75			2014-01-10 21:30:00	1712.5	-275.021	11.1299	-19.511
2014-01-03 04:05:00	1034.7	-392.7	20.5			2014-01-10 22:00:00	-24.7107			2014-01-10 22:00:00	1316.15	-409.288	32.641	-23.348			2014-01-10 22:30:00	1693.68	-275.705	11.1932	-20.094
2014-01-03 04:38:00	944.006	-407.8	13.4			2014-01-10 23:00:00	-26.3651			2014-01-10 23:00:00	1278.46	-410.839	31.9626	-23.887			2014-01-10 23:30:00	1673.61	-276.455	11.2162	-20.63
2014-01-03 05:23:00	1150.81	-391.5	15.9			2014-01-11	-26.8367			2014-01-11	1240.11	-411.084	30.7239	-24.36			2014-01-11 00:30:00	1652.47	-277.277	11.2021	-21.082
2014-01-03 05:56:00	1136.42	-393	29.1			2014-01-11 01:00:00	-24.7625			2014-01-11 01:00:00	1205.27	-412.824	29.4432	-24.719			2014-01-11 01:30:00	1630.3	-278.159	11.2403	-21.419
2014-01-03 06:29:00	1212.93	-391.6	26.3			2014-01-11 02:00:00	-22.3744			2014-01-11 02:00:00	1174.36	-416.096	29.0591	-25.011			2014-01-11 02:30:00	1607.64	-279.079	11.2917	-21.616
2014-01-03 07:14:00	1290.9	-383.2	29.3			2014-01-11 03:00:00	-25.9148			2014-01-11 03:00:00	1143.96	-420.618	31.8341	-25.128			2014-01-11 03:30:00	1585.29	-279.965	11.3207	-21.662
2014-01-03 07:47:00	1368.32	-377.1	20.2			2014-01-11 04:00:00	-26.9654			2014-01-11 04:00:00	1112.76	-428.301	36.1425	-25.16			2014-01-11 04:30:00	1564.09	-280.79	11.3268	-21.538
2014-01-03 08:20:00	1413.55	-375.1	27.2			2014-01-11 05:00:00	-26.5839			2014-01-11 05:00:00	1084.43	-437.432	39.9301	-24.99			2014-01-11 05:30:00	1544.57	-281.508	11.3758	-21.153
2014-01-03 09:05:00	1406.12	-375.8	20.9			2014-01-11 06:00:00	-25.591			2014-01-11 06:00:00	1063.9	-444.062	42.2187	-24.733			2014-01-11 06:30:00	1528.39	-282.05	11.4188	-20.543
2014-01-03 09:38:00	1415.23	-375.6	19.7			2014-01-11 07:00:00	-24.5451			2014-01-11 07:00:00	1056.71	-444.973	42.5034	-24.283			2014-01-11 07:30:00	1518.27	-282.288	11.4057	-19.792
2014-01-03 10:11:00	1408.87	-378.6	19.7			2014-01-11 08:00:00	-23.621			2014-01-11 08:00:00	1062.07	-440.117	41.3139	-23.765			2014-01-11 08:30:00	1517.05	-282.063	11.427	-18.952
2014-01-03 10:56:00	1421.59	-378	18.9			2014-01-11 09:00:00	-22.4779			2014-01-11 09:00:00	1075.54	-431.181	39.2071	-23.152			2014-01-11 09:30:00	1527.76	-281.404	11.4357	-18.104
2014-01-03 12:10:00	1572.29	-372.6	17.7			2014-01-11 10:00:00	-21.5274			2014-01-11 10:00:00	1093.4	-421.813	37.2949	-22.516			2014-01-11 10:30:00	1553.26	-280.269	11.3973	-17.333
2014-01-03 12:55:00	1575.89	-370.8	9.1			2014-01-11 11:00:00	-20.4844			2014-01-11 11:00:00	1117.83	-414.853	35.8245	-21.907			2014-01-11 11:30:00	1594.25	-278.659	11.3494	-16.709
2014-01-03 13:28:00	1524.87	-376.5	9.4			2014-01-11 12:00:00	-19.5602			2014-01-11 12:00:00	1144.55	-412.241	35.1134	-21.33			2014-01-11 12:30:00	1646.93	-276.673	11.2635	-16.258
2014-01-03 14:01:00	1434.7	-376.9	15			2014-01-11 13:00:00	-19.0339			2014-01-11 13:00:00	1168.85	-411.744	33.8926	-20.916			2014-01-11 13:30:00	1702.51	-274.589	11.1937	-15.984
2014-01-03 14:46:00	1510.64	-372.9	20.3			2014-01-11 14:00:00	-18.5754			2014-01-11 14:00:00	1191.39	-412.158	32.312	-20.598			2014-01-11 14:30:00	1744.85	-272.818	11.1375	-15.892
2014-01-03 15:19:00	1519.59	-373	21.5			2014-01-11 15:00:00	-18.0856			2014-01-11 15:00:00	1212.12	-411.024	30.7809	-20.478			2014-01-11 15:30:00	1768.19	-271.463	11.0539	-16.022
2014-01-03 15:52:00	1531.64	-381.7	27.3			2014-01-11 16:00:00	-17.9651			2014-01-11 16:00:00	1226.82	-409.266	29.6943	-20.496			2014-01-11 16:30:00	1778.15	-270.365	11.0112	-16.405
2014-01-03 16:37:00	1483.65	-384.1	24.1			2014-01-11 17:00:00	-17.92			2014-01-11 17:00:00	1233.67	-407.817	29.3012	-20.743			2014-01-11 17:30:00	1781.28	-269.363	10.9423	-17.015
2014-01-03 17:10:00	1479.75	-383.1	24.5			2014-01-11 18:00:00	-18.4508			2014-01-11 18:00:00	1235.45	-407.125	28.6872	-21.121			2014-01-11 18:30:00	1782.11	-268.389	10.8566	-17.708
2014-01-03 17:43:00	1485.35	-384.6	24.2			2014-01-11 19:00:00	-19.6408			2014-01-11 19:00:00	1230.9	-406.94	28.3577	-21.668			2014-01-11 19:30:00	1782.28	-267.497	10.787	-18.328
2014-01-03 18:28:00	1500.24	-384.7	26.5			2014-01-11 20:00:00	-21.3323			2014-01-11 20:00:00	1221.34	-407.435	28.0132	-22.265			2014-01-11 20:30:00	1781.87	-266.653	10.7159	-18.922
2014-01-03 19:01:00	1504.64	-385.8	29.1			2014-01-11 21:00:00	-22.9625			2014-01-11 21:00:00	1206.03	-408.34	27.5671	-22.956			2014-01-11 21:30:00	1780.91	-265.877	10.6202	-19.513
2014-01-03 19:34:00	1483.04	-390	29.8			2014-01-11 22:00:00	-24.6082			2014-01-11 22:00:00	1172.96	-410.453	26.8869	-23.623			2014-01-11 22:30:00	1779.52	-265.16	10.4888	-20.104
2014-01-03 20:19:00	1288.22	-399	28.9			2014-01-11 23:00:00	-26.1551			2014-01-11 23:00:00	1142.47	-414.743	27.1777	-24.245			2014-01-11 23:30:00	1777.96	-264.503	10.3943	-20.652
2014-01-03 20:52:00	1050.15	-402.9	35.6			2014-01-12	-27.7846			2014-01-12	1110.09	-419.726	28.3655	-24.809			2014-01-12 00:30:00	1776.78	-263.905	10.2917	-21.116
2014-01-03 21:25:00	933.891	-406.4	36.2			2014-01-12 01:00:00	-28.7293			2014-01-12 01:00:00	1078.69	-425.51	30.5152	-25.252			2014-01-12 01:30:00	1777.64	-263.357	10.1397	-21.453
2014-01-03 22:10:00	824.64	-410.6	35.7			2014-01-12 02:00:00	-29.2628			2014-01-12 02:00:00	1062.66	-431.77	31.7439	-25.605			2014-01-12 02:30:00	1781.81	-262.824	10.0448	-21.653
2014-01-03 22:43:00	853.494	-410.7	33.5			2014-01-12 03:00:00	-27.9515			2014-01-12 03:00:00	1042.94	-437.01	33.9512	-25.765			2014-01-12 03:30:00	1789.72	-262.279	9.94186	-21.705
2014-01-03 23:16:00	705.271	-415.8	33.2			2014-01-12 04:00:00	-26.2838			2014-01-12 04:00:00	1027.94	-441.527	35.1401	-25.807			2014-01-12 04:30:00	1794.28	-262.033	9.87205	-21.597
2014-01-04 00:01:00	612.692	-420.9	49.9			2014-01-12 05:00:00	-24.641			2014-01-12 05:00:00	1020.15	-445.087	35.9316	-25.621			2014-01-12 05:30:00	1785.24	-262.474	9.76626	-21.315
2014-01-04 00:34:00	570.986	-424.8	49.3			2014-01-12 06:00:00	-22.27			2014-01-12 06:00:00	1019.59	-447.7	36.5954	-25.337			2014-01-12 06:30:00	1773.77	-263.04	9.70324	-20.795
2014-01-04 01:07:00	538.494	-432.2	49.9			2014-01-12 07:00:00	-21.0844			2014-01-12 07:00:00	1029.23	-448.565	36.8368	-24.882			2014-01-12 07:30:00	1765.36	-263.466	9.60332	-20.052
2014-01-04 01:52:00	549.847	-439.6	43.3			2014-01-12 08:00:00	-19.9039			2014-01-12 08:00:00	1049.73	-447.47	36.5606	-24.335			2014-01-12 08:30:00	1762.6	-263.671	9.57454	-19.214
2014-01-04 02:25:00	536.716	-441.8	43.5			2014-01-12 09:00:00	-19.2844			2014-01-12 09:00:00	1080.67	-444.739	35.8632	-23.703			2014-01-12 09:30:00	1767.95	-263.535	9.56458	-18.387
2014-01-04 02:58:00	537.745	-439.8	47.1			2014-01-12 10:00:00	-18.9164			2014-01-12 10:00:00	1119.17	-440.985	34.7441	-23.041			2014-01-12 10:30:00	1786.03	-262.823	9.48588	-17.709
2014-01-04 03:43:00	553.798	-439	38.9			2014-01-12 11:00:00	-18.8793			2014-01-12 11:00:00	1159.88	-436.872	33.429	-22.398			2014-01-12 11:30:00	1822.41	-261.669	9.39204	-17.272
2014-01-04 04:16:00	566.348	-437.9	30.8			2014-01-12 12:00:00	-18.733			2014-01-12 12:00:00	1200.59	-432.681	32.6014	-21.811			2014-01-12 12:30:00	1859.06	-260.708	9.32473	-16.949
2014-01-04 04:49:00	607.793	-435.4	48.8			2014-01-12 13:00:00	-18.2851			2014-01-12 13:00:00	1240.18	-428.729	31.9727	-21.355			2014-01-12 13:30:00	1889.62	-260.114	9.25461	-16.71
2014-01-04 05:34:00	640.997	-435.8	48.9			2014-01-12 14:00:00	-18.1972			2014-01-12 14:00:00	1275.98	-425.375	31.3958	-21.033			2014-01-12 14:30:00	1918.77	-259.552	9.22245	-16.575
2014-01-04 06:07:00	667.913	-435.1	35.6			2014-01-12 15:00:00	-18.0657			2014-01-12 15:00:00	1305.37	-422.822	30.9185	-20.888			2014-01-12 15:30:00	1936.38	-259.187	9.19125	-16.568
2014-01-04 06:40:00	704.28	-429	41.9			2014-01-12 16:00:00	-17.9333			2014-01-12 16:00:00	1328.33	-421.005	30.7472	-20.888			2014-01-12 16:30:00	1948.64	-258.773	9.13516	-16.811
2014-01-04 07:25:00	771.733	-425.7	41.8			2014-01-12 17:00:00	-17.9656			2014-01-12 17:00:00	1344.1	-419.972	30.9016	-21.062			2014-01-12 17:30:00	1951.07	-258.69	9.10769	-17.329
2014-01-04 07:58:00	820.421	-421.7	37			2014-01-12 18:00:00	-18.0674			2014-01-12 18:00:00	1348.89	-419.799	32.2855	-21.353			2014-01-12 18:30:00	1946.01	-258.91	9.03424	-18.031
2014-01-04 08:31:00	881.864	-419.5	34.5			2014-01-12 19:00:00	-18.1387			2014-01-12 19:00:00	1337.89	-420.462	34.5906	-21.786			2014-01-12 19:30:00	1937.17	-259.259	8.98485	-18.788
2014-01-04 09:16:00	966.575	-415.6	32			2014-01-12 20:00:00	-18.2098			2014-01-12 20:00:00	1312.96	-422.734	36.267	-22.256			2014-01-12 20:30:00	1923.63	-259.785	8.96372	-19.485
2014-01-04 09:49:00	1031.1	-412.9	30.4			2014-01-12 21:00:00	-18.6782			2014-01-12 21:00:00	1272.3	-425.85	36.7697	-22.829			2014-01-12 21:30:00	1903.17	-260.615	8.90854	-20.109
2014-01-04 10:22:00	1088.21	-409.8	32.1			2014-01-12 22:00:00	-18.8274			2014-01-12 22:00:00	1217.41	-429.81	36.3005	-23.397			2014-01-12 22:30:00	1875.17	-261.803	8.86438	-20.672
2014-01-04 11:07:00	1241.64	-403.5	31.1			2014-01-12 23:00:00	-18.7207			2014-01-12 23:00:00	1150.52	-434.972	35.7575	-23.983			2014-01-12 23:30:00	1843	-263.188	8.80786	-21.154
2014-01-04 11:49:00	1296.74	-403.6	28.5			2014-01-13	-18.7948			2014-01-13	1078.24	-441.337	35.5116	-24.504			2014-01-13 00:30:00	1808.7	-264.673	8.71172	-21.547
2014-01-04 12:22:00	1329.56	-403.1	27.6			2014-01-13 01:00:00	-20.703			2014-01-13 01:00:00	1011.48	-450.078	38.2011	-25.021			2014-01-13 01:30:00	1774.08	-266.176	8.698	-21.83
2014-01-04 13:07:00	1423.27	-401.5	26.4			2014-01-13 02:00:00	-22.4869			2014-01-13 02:00:00	962.889	-463.989	42.1975	-25.452			2014-01-13 02:30:00	1741.64	-267.548	8.62524	-21.974
2014-01-04 13:40:00	1434.46	-401.5	25.3			2014-01-13 03:00:00	-24.1203			2014-01-13 03:00:00	930.971	-476.839	45.3549	-25.671			2014-01-13 03:30:00	1712.45	-268.731	8.53175	-21.962
2014-01-04 14:13:00	1508.68	-401	22.2			2014-01-13 04:00:00	-25.733			2014-01-13 04:00:00	910.576	-487.361	45.8671	-25.771			2014-01-13 04:30:00	1687.67	-269.682	8.52853	-21.762
2014-01-04 14:58:00	1520.08	-400.5	23.3			2014-01-13 05:00:00	-25.8705			2014-01-13 05:00:00	900.057	-495.168	45.2775	-25.658			2014-01-13 05:30:00	1668.48	-270.297	8.44757	-21.36
2014-01-04 15:31:00	1522.17	-399.8	23.7			2014-01-13 06:00:00	-25.1739			2014-01-13 06:00:00	900.408	-498.898	45.0992	-25.414			2014-01-13 06:30:00	1655.61	-270.546	8.37976	-20.777
2014-01-04 16:04:00	1551.98	-401.6	22			2014-01-13 07:00:00	-24.0802			2014-01-13 07:00:00	914.37	-497.785	44.5634	-24.975			2014-01-13 07:30:00	1650.31	-270.371	8.29273	-20.061
2014-01-04 16:49:00	1557.42	-399.2	20.3			2014-01-13 08:00:00	-22.4748			2014-01-13 08:00:00	941.068	-492.231	42.7103	-24.434			2014-01-13 08:30:00	1654.27	-269.743	8.30275	-19.28
2014-01-04 17:22:00	1546.43	-400.3	21.3			2014-01-13 09:00:00	-21.0405			2014-01-13 09:00:00	978.914	-482.72	39.6429	-23.777			2014-01-13 09:30:00	1671.56	-268.416	8.23816	-18.546
2014-01-04 17:55:00	1492.67	-403.7	17.2			2014-01-13 10:00:00	-20.3916			2014-01-13 10:00:00	1026.64	-471.44	35.5536	-23.079			2014-01-13 10:30:00	1707.1	-266.373	8.19173	-17.964
2014-01-04 18:40:00	1371.53	-405.4	25.3			2014-01-13 11:00:00	-19.4549			2014-01-13 11:00:00	1083.34	-458.421	31.0169	-22.366			2014-01-13 11:30:00	1758.83	-264.157	8.16805	-17.522
2014-01-04 19:13:00	1288.69	-407.9	20.8			2014-01-13 12:00:00	-18.8733			2014-01-13 12:00:00	1146.48	-444.5	27.4134	-21.694			2014-01-13 12:30:00	1800.38	-262.243	8.13136	-17.134
2014-01-04 19:46:00	1133.95	-411	26.5			2014-01-13 13:00:00	-18.2115			2014-01-13 13:00:00	1209.68	-431.293	23.4135	-21.108			2014-01-13 13:30:00	1846.24	-260.57	8.09566	-16.861
2014-01-04 20:31:00	1007.91	-413.6	23.2			2014-01-13 14:00:00	-17.6285			2014-01-13 14:00:00	1263.3	-419.131	20.7674	-20.648			2014-01-13 14:30:00	1865.47	-259.679	8.08477	-16.664
2014-01-04 21:04:00	922.109	-417.8	27.3			2014-01-13 15:00:00	-17.1557			2014-01-13 15:00:00	1300.5	-410.536	19.4292	-20.412			2014-01-13 15:30:00	1884.18	-259.019	8.06645	-16.642
2014-01-04 21:37:00	845.299	-419.9	27.8			2014-01-13 16:00:00	-16.8797			2014-01-13 16:00:00	1319.1	-404.516	20.5078	-20.312			2014-01-13 16:30:00	1908.55	-258.164	8.06538	-16.866
2014-01-04 22:22:00	777.614	-425.4	24.9			2014-01-13 17:00:00	-16.9585			2014-01-13 17:00:00	1317.32	-402.155	23.375	-20.453			2014-01-13 17:30:00	1909.44	-258.291	8.09318	-17.302
2014-01-04 22:55:00	741.685	-424.9	32.9			2014-01-13 18:00:00	-17.6698			2014-01-13 18:00:00	1300.93	-403.101	26.5232	-20.728			2014-01-13 18:30:00	1896.16	-259.044	8.11077	-17.87
2014-01-04 23:28:00	719.885	-427.3	36			2014-01-13 19:00:00	-19.0054			2014-01-13 19:00:00	1275.5	-404.937	28.1121	-21.196			2014-01-13 19:30:00	1876.3	-260.025	8.19684	-18.504
2014-01-05 00:13:00	649.747	-431.3	41.2			2014-01-13 20:00:00	-20.4497			2014-01-13 20:00:00	1246.54	-406.362	28.3762	-21.723			2014-01-13 20:30:00	1852.92	-261.128	8.27342	-19.138
2014-01-05 00:46:00	641.094	-433.8	42.8			2014-01-13 21:00:00	-21.8411			2014-01-13 21:00:00	1224.05	-409.006	28.6755	-22.252			2014-01-13 21:30:00	1826.82	-262.389	8.2434	-19.72
2014-01-05 01:19:00	613.845	-434.3	48.2			2014-01-13 22:00:00	-22.8828			2014-01-13 22:00:00	1199.81	-414.236	28.9552	-22.734			2014-01-13 22:30:00	1797.1	-263.916	8.31035	-20.217
2014-01-05 02:04:00	596.395	-438.2	41			2014-01-13 23:00:00	-24.8131			2014-01-13 23:00:00	1176.7	-421.663	29.2352	-23.045			2014-01-13 23:30:00	1763.81	-265.665	8.39153	-20.631
2014-01-05 02:37:00	577.531	-442	46			2014-01-14	-26.0703			2014-01-14	1152	-429.956	30.0633	-23.331			2014-01-14 00:30:00	1728.93	-267.511	8.45804	-20.962
2014-01-05 03:10:00	584.471	-438	38.5			2014-01-14 01:00:00	-26.8544			2014-01-14 01:00:00	1129.32	-437.358	32.2784	-23.527			2014-01-14 01:30:00	1693.54	-269.419	8.54443	-21.211
2014-01-05 03:55:00	573.166	-439.1	36			2014-01-14 02:00:00	-27.0316			2014-01-14 02:00:00	1106.79	-444.306	34.6683	-23.709			2014-01-14 02:30:00	1658.06	-271.355	8.62368	-21.354
2014-01-05 04:28:00	595.439	-437.5	51.1			2014-01-14 03:00:00	-27.1143			2014-01-14 03:00:00	1134.79	-441.899	36.7463	-23.817			2014-01-14 03:30:00	1623.07	-273.317	8.68622	-21.357
2014-01-05 05:01:00	605.682	-436	38.3			2014-01-14 04:00:00	-26.7221			2014-01-14 04:00:00	1147.67	-443.016	38.8559	-23.872			2014-01-14 04:30:00	1590.74	-275.204	8.81843	-21.199
2014-01-05 05:46:00	643.037	-433.7	40.2			2014-01-14 05:00:00	-25.681			2014-01-14 05:00:00	1174.13	-439.855	39.8603	-23.616			2014-01-14 05:30:00	1564.1	-276.826	8.9609	-20.868
2014-01-05 06:19:00	681.364	-430.8	36.7			2014-01-14 06:00:00	-24.5518			2014-01-14 06:00:00	1162.19	-441.161	39.929	-23.293			2014-01-14 06:30:00	1543.64	-278.102	9.12316	-20.37
2014-01-05 06:52:00	730.266	-428.4	32.6			2014-01-14 07:00:00	-22.9072			2014-01-14 07:00:00	1174.37	-438.941	38.4665	-22.871			2014-01-14 07:30:00	1532.42	-278.844	9.24256	-19.736
2014-01-05 07:37:00	807.08	-427	37.2			2014-01-14 08:00:00	-21.9041			2014-01-14 08:00:00	1217.75	-427.119	36.8312	-22.36			2014-01-14 08:30:00	1535.72	-278.804	9.40306	-19.047
2014-01-05 08:10:00	883.121	-422.2	35.5			2014-01-14 09:00:00	-20.6156			2014-01-14 09:00:00	1214.16	-419.79	36.0886	-21.705			2014-01-14 09:30:00	1559.31	-278.112	9.51997	-18.382
2014-01-05 08:43:00	974.74	-417.7	35.4			2014-01-14 10:00:00	-19.5772			2014-01-14 10:00:00	1230.79	-407.542	32.6605	-21.091			2014-01-14 10:30:00	1604.89	-276.946	9.6426	-17.803
2014-01-05 09:28:00	1116.04	-410.1	31.4			2014-01-14 11:00:00	-18.9225			2014-01-14 11:00:00	1252.66	-395.991	30.1856	-20.537			2014-01-14 11:30:00	1668.89	-275.369	9.78341	-17.322
2014-01-05 10:01:00	1193.29	-409	29.3			2014-01-14 12:00:00	-18.2674			2014-01-14 12:00:00	1287.1	-387.341	26.0614	-20.02			2014-01-14 12:30:00	1711.13	-274.277	9.86947	-16.9
2014-01-05 10:34:00	1340.99	-403.6	29.8			2014-01-14 13:00:00	-18.058			2014-01-14 13:00:00	1326.28	-382.36	23.0864	-19.633			2014-01-14 13:30:00	1765.92	-273.185	9.95983	-16.596
2014-01-05 11:19:00	1447.62	-402.9	26.3			2014-01-14 14:00:00	-17.5308			2014-01-14 14:00:00	1362.25	-381.045	21.2181	-19.316			2014-01-14 14:30:00	1810.78	-272.509	10.0283	-16.403
2014-01-05 11:59:00	1440.37	-406.5	27.6			2014-01-14 15:00:00	-17.6177			2014-01-14 15:00:00	1384.93	-381.275	19.3254	-19.17			2014-01-14 15:30:00	1843.77	-272.243	10.1409	-16.394
2014-01-05 12:32:00	1481.94	-404.9	24.7			2014-01-14 16:00:00	-17.6285			2014-01-14 16:00:00	1394.11	-379.893	21.986	-19.121			2014-01-14 16:30:00	1855.16	-272.592	10.2653	-16.624
2014-01-05 13:17:00	1560.52	-403	23.7			2014-01-14 17:00:00	-17.7097			2014-01-14 17:00:00	1392.36	-376.351	24.0412	-19.293			2014-01-14 17:30:00	1847.67	-273.426	10.3887	-17.064
2014-01-05 13:50:00	1597.8	-402.1	24			2014-01-14 18:00:00	-18.3407			2014-01-14 18:00:00	1387.37	-374.46	23.8035	-19.589			2014-01-14 18:30:00	1831.91	-274.647	10.5185	-17.652
2014-01-05 14:23:00	1635.88	-400.8	23.1			2014-01-14 19:00:00	-19.7672			2014-01-14 19:00:00	1377.91	-373.676	22.4692	-20.115			2014-01-14 19:30:00	1812.92	-276.016	10.6081	-18.306
2014-01-05 15:08:00	1699.53	-396.9	23.9			2014-01-14 20:00:00	-21.3541			2014-01-14 20:00:00	1365.04	-373.448	20.5755	-20.699			2014-01-14 20:30:00	1795.05	-277.28	10.8086	-18.958
2014-01-05 15:41:00	1744.69	-393.6	23.3			2014-01-14 21:00:00	-22.8077			2014-01-14 21:00:00	1348.32	-373.645	19.0296	-21.317			2014-01-14 21:30:00	1780.57	-278.349	10.9037	-19.553
2014-01-05 16:14:00	1765.03	-393.9	22.7			2014-01-14 22:00:00	-24.2703			2014-01-14 22:00:00	1329.27	-374.769	18.2342	-21.896			2014-01-14 22:30:00	1770.42	-279.254	10.9937	-20.057
2014-01-05 16:59:00	1751.89	-397.4	23			2014-01-14 23:00:00	-25.8139			2014-01-14 23:00:00	1310.19	-376.697	17.5399	-22.435			2014-01-14 23:30:00	1765.58	-279.964	11.0942	-20.477
2014-01-05 17:32:00	1719.95	-400.1	24.8			2014-01-15	-27.3985			2014-01-15	1294.46	-379.284	17.2649	-22.921			2014-01-15 00:30:00	1766.21	-280.496	11.1581	-20.819
2014-01-05 18:05:00	1643.18	-402.9	25.3			2014-01-15 01:00:00	-28.0779			2014-01-15 01:00:00	1281	-382.541	17.0341	-23.294			2014-01-15 01:30:00	1770.21	-280.887	11.2085	-21.074
2014-01-05 18:50:00	1497.19	-405.4	32.1			2014-01-15 02:00:00	-28.4759			2014-01-15 02:00:00	1270.23	-385.873	16.197	-23.608			2014-01-15 02:30:00	1774.96	-281.221	11.3423	-21.197
2014-01-05 19:23:00	1438.8	-402.3	33.2			2014-01-15 03:00:00	-28.6282			2014-01-15 03:00:00	1282.5	-386.17	15.1687	-23.835			2014-01-15 03:30:00	1781.34	-281.485	11.4045	-21.212
2014-01-05 19:56:00	1302.23	-406.4	38.7			2014-01-15 04:00:00	-28.5895			2014-01-15 04:00:00	1268.4	-388.23	13.9553	-23.949			2014-01-15 04:30:00	1789.14	-281.65	11.4897	-21.086
2014-01-05 20:41:00	1164.24	-402.6	38.5			2014-01-15 05:00:00	-27.7211			2014-01-15 05:00:00	1242.82	-391.436	13.9339	-23.895			2014-01-15 05:30:00	1797.68	-281.679	11.5257	-20.802
2014-01-05 21:14:00	1135.85	-397.8	34.2			2014-01-15 06:00:00	-26.4875			2014-01-15 06:00:00	1225.18	-394.862	14.7127	-23.723			2014-01-15 06:30:00	1807.44	-281.513	11.5711	-20.371
2014-01-05 21:47:00	947.633	-408.2	33.3			2014-01-15 07:00:00	-25.2234			2014-01-15 07:00:00	1218.77	-398.994	17.6134	-23.353			2014-01-15 07:30:00	1821.07	-281.046	11.6587	-19.799
2014-01-05 22:32:00	914.805	-405.7	26.5			2014-01-15 08:00:00	-23.8452			2014-01-15 08:00:00	1224.34	-404.617	20.4285	-22.896			2014-01-15 08:30:00	1841.03	-280.184	11.6324	-19.087
2014-01-05 23:05:00	798.181	-415.1	35.9			2014-01-15 09:00:00	-22.589			2014-01-15 09:00:00	1245.62	-409.658	20.8742	-22.359			2014-01-15 09:30:00	1868.12	-278.97	11.6694	-18.274
2014-01-05 23:38:00	727.568	-421.2	32.5			2014-01-15 10:00:00	-21.3734			2014-01-15 10:00:00	1280.48	-412.014	22.3412	-21.764			2014-01-15 10:30:00	1902.22	-277.412	11.6316	-17.49
2014-01-06 00:23:00	681.364	-423.1	36			2014-01-15 11:00:00	-20.4069			2014-01-15 11:00:00	1323.77	-412.172	21.4385	-21.108			2014-01-15 11:30:00	1943.1	-275.525	11.6135	-16.821
2014-01-06 00:56:00	656.083	-427.9	33.4			2014-01-15 12:00:00	-19.3459			2014-01-15 12:00:00	1371.68	-410.435	22.2119	-20.498			2014-01-15 12:30:00	1989.05	-273.352	11.5741	-16.327
2014-01-06 01:29:00	656.863	-432.1	30.9			2014-01-15 13:00:00	-18.6851			2014-01-15 13:00:00	1422.58	-408.702	23.207	-20.01			2014-01-15 13:30:00	2034.83	-271.033	11.4872	-16.042
2014-01-06 02:14:00	587.328	-436	47.2			2014-01-15 14:00:00	-18.2933			2014-01-15 14:00:00	1476.49	-407.386	24.1874	-19.648			2014-01-15 14:30:00	2072.49	-268.794	11.3269	-15.982
2014-01-06 02:47:00	605.107	-444.7	29.3			2014-01-15 15:00:00	-17.8798			2014-01-15 15:00:00	1531.94	-405.518	24.3879	-19.518			2014-01-15 15:30:00	2100.29	-266.774	11.2596	-16.173
2014-01-06 03:20:00	627.824	-435.3	37.7			2014-01-15 16:00:00	-17.7462			2014-01-15 16:00:00	1583.53	-403.244	24.5989	-19.564			2014-01-15 16:30:00	2120.05	-265.038	11.1442	-16.56
2014-01-06 04:05:00	641.774	-436.9	38.6			2014-01-15 17:00:00	-17.7907			2014-01-15 17:00:00	1616.65	-402.156	24.9718	-19.835			2014-01-15 17:30:00	2132.26	-263.63	11.1194	-17.022
2014-01-06 04:38:00	642.454	-438	34.5			2014-01-15 18:00:00	-18.5203			2014-01-15 18:00:00	1647.18	-401.446	25.0956	-20.221			2014-01-15 18:30:00	2136.74	-262.603	11.0123	-17.487
2014-01-06 05:11:00	711.625	-429.8	37			2014-01-15 19:00:00	-19.6959			2014-01-15 19:00:00	1672.74	-400.697	25.3324	-20.873			2014-01-15 19:30:00	2135.38	-261.937	10.9655	-17.707
2014-01-06 05:56:00	716.3	-425.2	32.7			2014-01-15 20:00:00	-21.2566			2014-01-15 20:00:00	1696.26	-399.863	25.4729	-21.518			2014-01-15 20:30:00	2130.13	-261.535	10.9331	-17.433
2014-01-06 06:29:00	729.067	-425.8	29.4			2014-01-15 21:00:00	-22.9698			2014-01-15 21:00:00	1718.33	-398.89	25.3263	-22.217			2014-01-15 21:30:00	2122.2	-261.321	10.8758	-17.238
2014-01-06 07:02:00	803.701	-422.8	33.5			2014-01-15 22:00:00	-23.94			2014-01-15 22:00:00	1739.31	-397.546	25.685	-22.847			2014-01-15 22:30:00	2112.51	-261.269	10.8653	-16.703
2014-01-06 07:48:00	888.259	-422	34.9			2014-01-15 23:00:00	-23.6069			2014-01-15 23:00:00	1760.17	-396.383	26.0204	-23.415			2014-01-15 23:30:00	2100.92	-261.346	10.828	-15.741
2014-01-06 08:21:00	998.586	-419.7	33.1			2014-01-16	-24.6744			2014-01-16	1779.94	-395.451	26.3555	-23.906			2014-01-16 00:30:00	2087.31	-261.563	10.8034	-16.21
2014-01-06 08:54:00	1060.7	-415.9	29.3			2014-01-16 01:00:00	-26.3326			2014-01-16 01:00:00	1790.11	-394.066	26.7563	-23.988			2014-01-16 01:30:00	2072.68	-261.871	10.8143	-16.454
2014-01-06 09:39:00	1175	-411.5	30.1			2014-01-16 02:00:00	-26.3218			2014-01-16 02:00:00	1787.93	-396.562	27.5144	-24.059			2014-01-16 02:30:00	2058.61	-262.184	10.7862	-15.462
2014-01-06 10:12:00	1175.57	-413.1	32.5			2014-01-16 03:00:00	-26.0918			2014-01-16 03:00:00	1655.05	-406.284	29.4764	-24.034			2014-01-16 03:30:00	2045.9	-262.474	10.8072	-15.688
2014-01-06 10:45:00	1226.57	-412.8	30.6			2014-01-16 04:00:00	-24.9859			2014-01-16 04:00:00	1654.77	-408.337	30.0944	-24.006			2014-01-16 04:30:00	2034.83	-262.737	10.8119	-16.269
2014-01-06 12:10:00	1248.33	-403.7	29.1			2014-01-16 05:00:00	-25.4061			2014-01-16 05:00:00	1626.96	-412.15	30.8524	-23.701			2014-01-16 05:30:00	2025.78	-262.939	10.8194	-16.99
2014-01-06 12:43:00	1260.35	-403.9	28.6			2014-01-16 06:00:00	-23.0075			2014-01-16 06:00:00	1580.78	-417.74	32.386	-23.293			2014-01-16 06:30:00	2018.58	-263.123	10.8379	-17.421
2014-01-06 13:28:00	1277.63	-404.4	24.3			2014-01-16 07:00:00	-24.8626			2014-01-16 07:00:00	1428.57	-429.784	34.7925	-22.551			2014-01-16 07:30:00	2012.76	-263.311	10.8703	-17.262
2014-01-06 14:01:00	1271.48	-403.7	26.1			2014-01-16 08:00:00	-24.1746			2014-01-16 08:00:00	1339.2	-438.179	36.6932	-21.867			2014-01-16 08:30:00	2008.25	-263.469	10.8973	-16.939
2014-01-06 14:34:00	1234.04	-404.8	25.7			2014-01-16 09:00:00	-22.7661			2014-01-16 09:00:00	1328.81	-441.191	36.9422	-21.13			2014-01-16 09:30:00	2006.16	-263.536	10.9036	-16.577
2014-01-06 15:19:00	1230.47	-404.6	28			2014-01-16 10:00:00	-22.0602			2014-01-16 10:00:00	1368.53	-440.278	36.9524	-20.636			2014-01-16 10:30:00	2008.02	-263.392	10.8754	-16.059
2014-01-06 15:52:00	1206.41	-404.7	30.5			2014-01-16 11:00:00	-20.5528			2014-01-16 11:00:00	1392.14	-438.406	35.9567	-20.147			2014-01-16 11:30:00	2013.94	-263.038	10.9319	-15.601
2014-01-06 16:25:00	1210.98	-403.8	34.2			2014-01-16 12:00:00	-19.4379			2014-01-16 12:00:00	1437.01	-433.972	34.8516	-19.623			2014-01-16 12:30:00	2023.85	-262.491	10.8744	-15.3
2014-01-06 17:10:00	1210.64	-410.4	36.4			2014-01-16 13:00:00	-18.9567			2014-01-16 13:00:00	1496.79	-427.573	33.2588	-19.163			2014-01-16 13:30:00	2037.12	-261.859	10.8697	-15.121
2014-01-06 17:43:00	1223.58	-408.5	41			2014-01-16 14:00:00	-18.332			2014-01-16 14:00:00	1587.88	-418.956	31.4598	-18.797			2014-01-16 14:30:00	2052.43	-261.205	10.8972	-15.134
2014-01-06 18:16:00	1237.26	-409	30.1			2014-01-16 15:00:00	-17.8623			2014-01-16 15:00:00	1667.36	-411.667	29.9348	-18.521			2014-01-16 15:30:00	2068.8	-260.531	10.8875	-15.111
2014-01-06 19:01:00	1205.84	-409.4	30.7			2014-01-16 16:00:00	-17.6161			2014-01-16 16:00:00	1697.56	-407.414	29.5378	-18.376			2014-01-16 16:30:00	2085.89	-259.891	10.8594	-15.041
2014-01-06 19:34:00	1159.61	-413.3	29.8			2014-01-16 17:00:00	-17.7695			2014-01-16 17:00:00	1683.71	-407.784	29.3479	-18.487			2014-01-16 17:30:00	2103.45	-259.324	10.8372	-14.913
2014-01-06 20:07:00	1306.09	-407.5	30.4			2014-01-16 18:00:00	-19.401			2014-01-16 18:00:00	1662.96	-409.703	29.2241	-18.702			2014-01-16 18:30:00	2120.72	-258.849	10.8261	-14.951
2014-01-06 20:52:00	1197.39	-408.5	31.5			2014-01-16 19:00:00	-21.3185			2014-01-16 19:00:00	1634.68	-412.945	29.5585	-19.242			2014-01-16 19:30:00	2135.95	-258.495	10.82	-14.862
2014-01-06 21:25:00	1182.83	-410.6	30.4			2014-01-16 20:00:00	-23.4923			2014-01-16 20:00:00	1600.29	-416.403	29.8062	-19.763			2014-01-16 20:30:00	2150.49	-258.24	10.7985	-14.795
2014-01-06 21:58:00	1189.42	-410.6	30			2014-01-16 21:00:00	-25.3415			2014-01-16 21:00:00	1555.55	-420.32	30.0194	-20.354			2014-01-16 21:30:00	2163.16	-258.121	10.8011	-14.812
2014-01-06 22:43:00	1066.54	-413.9	36.5			2014-01-16 22:00:00	-27.2166			2014-01-16 22:00:00	1509.8	-423.866	30.0309	-20.883			2014-01-16 22:30:00	2166.03	-258.377	10.8096	-15.392
2014-01-06 23:16:00	913.219	-419.3	31			2014-01-16 23:00:00	-28.6451			2014-01-16 23:00:00	1465.72	-426.92	29.9854	-21.42			2014-01-16 23:30:00	2147.21	-259.48	10.8371	-15.651
2014-01-06 23:49:00	934.741	-419.6	31.1			2014-01-17	-30.0685			2014-01-17	1417.96	-429.642	29.9625	-21.895			2014-01-17 00:30:00	2119.06	-260.953	10.8581	-16.089
2014-01-07 00:34:00	1031.86	-423.3	20.8			2014-01-17 01:00:00	-31.6502			2014-01-17 01:00:00	1374.71	-431.735	29.5075	-22.269			2014-01-17 01:30:00	2089.35	-262.46	10.9219	-16.696
2014-01-07 01:07:00	1049.38	-425.9	22.7			2014-01-17 02:00:00	-32.2469			2014-01-17 02:00:00	1333.72	-433.618	29.0951	-22.582			2014-01-17 02:30:00	2060.56	-263.861	10.8983	-16.732
2014-01-07 01:40:00	1032.96	-423.3	29.7			2014-01-17 03:00:00	-32.2075			2014-01-17 03:00:00	1297.6	-435.251	30.6596	-22.733			2014-01-17 03:30:00	2033.75	-265.128	10.989	-16.633
2014-01-07 02:25:00	1072.39	-422.5	29.9			2014-01-17 04:00:00	-31.3434			2014-01-17 04:00:00	1262.34	-435.691	32.3076	-22.808			2014-01-17 04:30:00	2009.97	-266.19	10.9968	-16.485
2014-01-07 02:58:00	1065.99	-419.7	30.6			2014-01-17 05:00:00	-30.2084			2014-01-17 05:00:00	1216.06	-436.903	33.7194	-22.71			2014-01-17 05:30:00	1990.83	-266.96	11.046	-17.706
2014-01-07 03:31:00	860.148	-425.5	31.7			2014-01-17 06:00:00	-28.5316			2014-01-17 06:00:00	1179.35	-438.322	34.6099	-22.606			2014-01-17 06:30:00	1977.14	-267.386	11.0686	-18.286
2014-01-07 04:16:00	705.172	-430.1	38.9			2014-01-17 07:00:00	-27.013			2014-01-17 07:00:00	1166.76	-438.697	34.4416	-22.479			2014-01-17 07:30:00	1969.36	-267.412	11.0824	-18.526
2014-01-07 04:49:00	818.057	-426.7	38.7			2014-01-17 08:00:00	-26.3138			2014-01-17 08:00:00	1169.82	-437.842	33.7281	-22.329			2014-01-17 08:30:00	1967.1	-267.029	11.0416	-18.672
2014-01-07 05:22:00	896.349	-422.2	35.2			2014-01-17 09:00:00	-25.5023			2014-01-17 09:00:00	1189.99	-435.761	32.9105	-22.098			2014-01-17 09:30:00	1969.76	-266.296	11.0359	-18.253
2014-01-07 06:07:00	1021.72	-415.6	17.8			2014-01-17 10:00:00	-24.3341			2014-01-17 10:00:00	1222.33	-432.707	31.5794	-21.73			2014-01-17 10:30:00	1976.95	-265.326	11.0078	-17.618
2014-01-07 06:40:00	1068.2	-404.5	27.3			2014-01-17 11:00:00	-23.0044			2014-01-17 11:00:00	1258.44	-429.575	30.2903	-21.34			2014-01-17 11:30:00	1989.35	-264.142	10.9542	-16.974
2014-01-07 07:13:00	1109.56	-402.4	30.6			2014-01-17 12:00:00	-22.0721			2014-01-17 12:00:00	1295.39	-426.08	28.9501	-20.934			2014-01-17 12:30:00	2005.9	-262.786	10.9166	-16.458
2014-01-07 07:58:00	1163.23	-402.7	21			2014-01-17 13:00:00	-21.3849			2014-01-17 13:00:00	1327.64	-422.447	27.6786	-20.589			2014-01-17 13:30:00	2025.12	-261.376	10.8465	-16.185
2014-01-07 08:31:00	1090.99	-402.7	12.7			2014-01-17 14:00:00	-20.9792			2014-01-17 14:00:00	1350.99	-418.637	26.7693	-20.324			2014-01-17 14:30:00	2042.37	-260.075	10.7464	-16.154
2014-01-07 09:04:00	1086.11	-403.1	19.6			2014-01-17 15:00:00	-20.7698			2014-01-17 15:00:00	1358.9	-415.622	26.4607	-20.246			2014-01-17 15:30:00	2053.01	-259.066	10.7111	-16.358
2014-01-07 09:49:00	1108.45	-400.3	24.5			2014-01-17 16:00:00	-20.9438			2014-01-17 16:00:00	1354.77	-414.248	26.6355	-20.321			2014-01-17 16:30:00	2055.76	-258.459	10.6717	-16.609
2014-01-07 10:22:00	1178.86	-396.4	23.2			2014-01-17 17:00:00	-21.4885			2014-01-17 17:00:00	1341.09	-414.305	26.903	-20.615			2014-01-17 17:30:00	2050.61	-258.224	10.6223	-16.591
2014-01-07 10:55:00	1234.61	-397.9	25.1			2014-01-17 18:00:00	-22.447			2014-01-17 18:00:00	1321.13	-415.397	27.1835	-21.06			2014-01-17 18:30:00	2038.47	-258.361	10.606	-16.134
2014-01-07 11:48:00	1310.77	-396	22.9			2014-01-17 19:00:00	-23.8157			2014-01-17 19:00:00	1296.24	-417.43	27.539	-21.688			2014-01-17 19:30:00	2019.38	-258.93	10.6011	-16.242
2014-01-07 12:21:00	1361.68	-395.5	21.5			2014-01-17 20:00:00	-25.5021			2014-01-17 20:00:00	1268.5	-420.051	27.97	-22.39			2014-01-17 20:30:00	1995.97	-259.784	10.636	-16.192
2014-01-07 12:54:00	1394.76	-393.9	22.2			2014-01-17 21:00:00	-27.2416			2014-01-17 21:00:00	1239.43	-423.056	28.589	-23.158			2014-01-17 21:30:00	1970.69	-260.75	10.6222	-16.187
2014-01-07 13:39:00	1434.46	-391.7	21.2			2014-01-17 22:00:00	-28.939			2014-01-17 22:00:00	1210.84	-426.275	29.1634	-23.913			2014-01-17 22:30:00	1943.74	-261.785	10.648	-16.257
2014-01-07 14:12:00	1479.39	-390.2	22.3			2014-01-17 23:00:00	-30.4657			2014-01-17 23:00:00	1184.34	-429.651	29.444	-24.632			2014-01-17 23:30:00	1914.55	-262.933	10.6855	-16.346
2014-01-07 14:45:00	1491.94	-388.3	21.7			2014-01-18	-31.6252			2014-01-18	1161.64	-432.812	29.648	-25.296			2014-01-18 00:30:00	1883.44	-264.186	10.6748	-16.429
2014-01-07 15:30:00	1504.4	-386.4	21.3			2014-01-18 01:00:00	-32.5043			2014-01-18 01:00:00	1143.49	-435.526	29.7641	-25.833			2014-01-18 01:30:00	1850.81	-265.534	10.7156	-16.431
2014-01-07 16:03:00	1527.21	-385.6	22.1			2014-01-18 02:00:00	-33.1833			2014-01-18 02:00:00	1129.28	-437.763	29.8404	-26.299			2014-01-18 02:30:00	1819.06	-266.882	10.7885	-16.59
2014-01-07 16:36:00	1526.1	-387.6	21.6			2014-01-18 03:00:00	-34.1213			2014-01-18 03:00:00	1118.39	-439.483	29.8855	-26.552			2014-01-18 03:30:00	1788.62	-268.252	10.8071	-16.821
2014-01-07 17:21:00	1550.25	-388.9	20.2			2014-01-18 04:00:00	-34.5287			2014-01-18 04:00:00	1109.28	-440.923	29.8707	-26.687			2014-01-18 04:30:00	1759.49	-269.677	10.8462	-17.561
2014-01-07 17:54:00	1551.37	-391.9	19.8			2014-01-18 05:00:00	-33.7646			2014-01-18 05:00:00	1101.81	-442.053	29.8768	-26.578			2014-01-18 05:30:00	1730.98	-271.216	10.9134	-17.67
2014-01-07 18:27:00	1478.29	-394.1	25.4			2014-01-18 06:00:00	-32.9177			2014-01-18 06:00:00	1094.9	-443.106	29.8081	-26.323			2014-01-18 06:30:00	1700.66	-273.002	11.0286	-18.017
2014-01-07 19:12:00	1424.11	-402.2	25			2014-01-18 07:00:00	-31.5459			2014-01-18 07:00:00	1088.12	-444.435	29.7833	-25.875			2014-01-18 07:30:00	1668.1	-274.989	11.1364	-18.986
2014-01-07 19:45:00	1300.59	-401	33.6			2014-01-18 08:00:00	-29.9			2014-01-18 08:00:00	1081.4	-445.74	30.2038	-25.36			2014-01-18 08:30:00	1636.47	-276.95	11.2798	-19.465
2014-01-07 20:18:00	1138.66	-407.1	26.4			2014-01-18 09:00:00	-28.4369			2014-01-18 09:00:00	1076.22	-446.641	30.7173	-24.789			2014-01-18 09:30:00	1606.34	-278.811	11.4018	-19.069
2014-01-07 21:03:00	1020.08	-407.1	23.5			2014-01-18 10:00:00	-26.6505			2014-01-18 10:00:00	1074.22	-446.38	31.3115	-24.218			2014-01-18 10:30:00	1579.24	-280.539	11.5231	-18.402
2014-01-07 21:36:00	984.216	-407.4	20			2014-01-18 11:00:00	-26.0477			2014-01-18 11:00:00	1074.74	-445.517	31.2826	-23.748			2014-01-18 11:30:00	1559.09	-282.099	11.646	-17.725
2014-01-07 22:09:00	889.624	-409.8	22.7			2014-01-18 12:00:00	-23.9667			2014-01-18 12:00:00	1081.1	-443.796	31.1181	-23.33			2014-01-18 12:30:00	1551.26	-283.26	11.7482	-17.294
2014-01-07 22:54:00	920.52	-409.1	18.2			2014-01-18 13:00:00	-24.4097			2014-01-18 13:00:00	1091.4	-441.108	30.394	-22.927			2014-01-18 13:30:00	1559.92	-283.799	11.8453	-17.092
2014-01-07 23:27:00	804.929	-424.8	26.5			2014-01-18 14:00:00	-24.1177			2014-01-18 14:00:00	1101.61	-438.664	30.0922	-22.618			2014-01-18 14:30:00	1561.84	-284.511	11.9321	-17.029
2014-01-08	751.938	-424.6	29.1			2014-01-18 15:00:00	-24.1216			2014-01-18 15:00:00	1107.6	-436.8	29.7884	-22.479			2014-01-18 15:30:00	1541.9	-285.955	12.0348	-17.182
2014-01-08 00:45:00	710.333	-418.8	38			2014-01-18 16:00:00	-23.9546			2014-01-18 16:00:00	1108.04	-435.607	29.6933	-22.484			2014-01-18 16:30:00	1513.74	-287.687	12.1661	-17.575
2014-01-08 01:18:00	641.483	-425.5	44.9			2014-01-18 17:00:00	-24.1956			2014-01-18 17:00:00	1102.92	-435.052	29.9099	-22.758			2014-01-18 17:30:00	1485.41	-289.445	12.3036	-18.02
2014-01-08 01:51:00	600.7	-438.1	35.3			2014-01-18 18:00:00	-24.4659			2014-01-18 18:00:00	1093.71	-435.045	30.4499	-23.183			2014-01-18 18:30:00	1458.07	-291.181	12.415	-18.413
2014-01-08 02:36:00	598.881	-439.3	35.2			2014-01-18 19:00:00	-25.221			2014-01-18 19:00:00	1081.01	-435.833	30.4961	-23.775			2014-01-18 19:30:00	1430.33	-292.97	12.5626	-18.247
2014-01-08 03:09:00	601.178	-441.4	44.7			2014-01-18 20:00:00	-26.34			2014-01-18 20:00:00	1066.51	-437.092	32.3571	-24.416			2014-01-18 20:30:00	1402.24	-294.849	12.6943	-17.745
2014-01-08 03:42:00	614.519	-435.9	46			2014-01-18 21:00:00	-28.0915			2014-01-18 21:00:00	1053.18	-439.174	34.0363	-25.133			2014-01-18 21:30:00	1376.22	-296.75	12.8154	-17.58
2014-01-08 04:27:00	687.964	-437	43.2			2014-01-18 22:00:00	-29.0348			2014-01-18 22:00:00	1042.01	-443.479	32.0419	-25.841			2014-01-18 22:30:00	1350.92	-298.691	12.9715	-17.06
2014-01-08 05:00:00	740.08	-425.8	41.5			2014-01-18 23:00:00	-30.1149			2014-01-18 23:00:00	1031.93	-447.619	32.2811	-26.499			2014-01-18 23:30:00	1325.89	-300.644	13.1168	-17.287
2014-01-08 05:33:00	807.694	-422.7	43.9			2014-01-19	-33.4966			2014-01-19	1023.2	-451.002	34.4498	-27.041			2014-01-19 00:30:00	1303.62	-302.276	13.2063	-17.539
2014-01-08 06:18:00	858.067	-425.2	33.6			2014-01-19 01:00:00	-35.2864			2014-01-19 01:00:00	1015.23	-454.18	38.2468	-27.417			2014-01-19 01:30:00	1289	-302.979	13.3037	-17.936
2014-01-08 06:51:00	874.331	-420.6	31.9			2014-01-19 02:00:00	-35.783			2014-01-19 02:00:00	1007.07	-457.603	40.2059	-27.728			2014-01-19 02:30:00	1283.04	-302.824	13.2977	-18.154
2014-01-08 07:24:00	924.865	-419.7	29.8			2014-01-19 03:00:00	-35.2116			2014-01-19 03:00:00	998.311	-461.24	40.6122	-27.767			2014-01-19 03:30:00	1279.88	-302.259	13.2977	-17.571
2014-01-08 08:09:00	1004.44	-415.2	34.2			2014-01-19 04:00:00	-33.2379			2014-01-19 04:00:00	988.75	-465.703	40.8139	-27.711			2014-01-19 04:30:00	1279.61	-301.44	13.2421	-17.514
2014-01-08 08:42:00	1056.41	-412.8	36.9			2014-01-19 05:00:00	-31.3731			2014-01-19 05:00:00	978.215	-470.445	40.0677	-27.369			2014-01-19 05:30:00	1281.32	-300.48	13.1991	-17.684
2014-01-08 09:15:00	1118.05	-411.7	41.6			2014-01-19 06:00:00	-28.328			2014-01-19 06:00:00	967.437	-474.684	39.8234	-26.971			2014-01-19 06:30:00	1284.3	-299.43	13.1384	-17.936
2014-01-08 10:00:00	1245.9	-408.2	36.3			2014-01-19 07:00:00	-27.5238			2014-01-19 07:00:00	959.368	-478.918	38.9657	-26.345			2014-01-19 07:30:00	1289.7	-298.3	13.1165	-18.165
2014-01-08 10:33:00	1317.1	-407.6	33.9			2014-01-19 08:00:00	-26.3982			2014-01-19 08:00:00	954.956	-482.195	37.9989	-25.704			2014-01-19 08:30:00	1294.46	-297.247	13.0314	-18.314
2014-01-08 11:06:00	1399.18	-406.3	28.2			2014-01-19 09:00:00	-25.5943			2014-01-19 09:00:00	957.514	-482.866	36.9739	-24.937			2014-01-19 09:30:00	1300.76	-296.247	12.9842	-17.915
2014-01-08 11:59:00	1535.7	-403.6	38.4			2014-01-19 10:00:00	-25.0644			2014-01-19 10:00:00	969.652	-481	35.4296	-24.201			2014-01-19 10:30:00	1308.81	-295.297	12.9957	-17.657
2014-01-08 12:32:00	1608.3	-401.8	44.7			2014-01-19 11:00:00	-24.34			2014-01-19 11:00:00	994.299	-477.198	33.318	-23.449			2014-01-19 11:30:00	1319.31	-294.318	12.9238	-17.456
2014-01-08 13:05:00	1670.2	-400.6	51.8			2014-01-19 12:00:00	-23.5936			2014-01-19 12:00:00	1032.74	-471.86	31.1078	-22.755			2014-01-19 12:30:00	1331.15	-293.432	12.9234	-17.45
2014-01-08 20:01:00	1348.31	-422	57.3			2014-01-19 13:00:00	-23.0589			2014-01-19 13:00:00	1087.18	-464.428	29.1144	-22.105			2014-01-19 13:30:00	1343.57	-292.637	12.8768	-17.268
2014-01-08 20:34:00	1225.88	-418.4	50			2014-01-19 14:00:00	-22.5157			2014-01-19 14:00:00	1140.4	-457.32	29.3859	-21.562			2014-01-19 14:30:00	1355.72	-292.073	12.8794	-17.139
2014-01-08 21:07:00	1116.59	-415.4	47.4			2014-01-19 15:00:00	-22.2815			2014-01-19 15:00:00	1183.3	-451.241	29.8816	-21.201			2014-01-19 15:30:00	1365.5	-291.863	12.8985	-16.938
2014-01-08 21:52:00	981.414	-419.1	37.8			2014-01-19 16:00:00	-22.1603			2014-01-19 16:00:00	1217.4	-445.362	29.664	-20.971			2014-01-19 16:30:00	1372.27	-291.884	12.9761	-16.889
2014-01-08 22:25:00	893.51	-421.5	32			2014-01-19 17:00:00	-22.2664			2014-01-19 17:00:00	1244.49	-439.665	28.9259	-21.049			2014-01-19 17:30:00	1378.04	-291.994	13.0008	-16.875
2014-01-08 22:58:00	829.381	-423.9	34.9			2014-01-19 18:00:00	-22.7418			2014-01-19 18:00:00	1279.2	-432.111	27.6622	-21.329			2014-01-19 18:30:00	1381.41	-292.238	13.0589	-16.981
2014-01-08 23:43:00	759.7	-427.1	27.3			2014-01-19 19:00:00	-24.2372			2014-01-19 19:00:00	1289.36	-427.662	27.0477	-21.899			2014-01-19 19:30:00	1374.64	-292.782	13.1228	-17.161
2014-01-09 00:16:00	723.974	-430.1	26.5			2014-01-19 20:00:00	-25.6348			2014-01-19 20:00:00	1299.04	-423.901	26.863	-22.506			2014-01-19 20:30:00	1366.43	-293.324	13.1914	-17.102
2014-01-09 00:49:00	684.022	-430.9	26.5			2014-01-19 21:00:00	-27.6107			2014-01-19 21:00:00	1306.58	-420.755	26.4448	-23.179			2014-01-19 21:30:00	1358.79	-293.834	13.2101	-17.382
2014-01-09 01:34:00	637.989	-434.8	37.6			2014-01-19 22:00:00	-29.3307			2014-01-19 22:00:00	1252.52	-423.988	26.9896	-23.782			2014-01-19 22:30:00	1351.63	-294.362	13.2956	-17.826
2014-01-09 02:07:00	624.154	-434.6	38.2			2014-01-19 23:00:00	-30.3672			2014-01-19 23:00:00	1231.13	-424.545	27.0806	-24.153			2014-01-19 23:30:00	1344.76	-294.926	13.3267	-18.305
2014-01-09 02:40:00	609.521	-435.9	34.2			2014-01-20	-30.397			2014-01-20	1224.28	-424.362	26.8606	-24.464			2014-01-20 00:30:00	1338.1	-295.529	13.3571	-18.763
2014-01-09 03:25:00	594.961	-432.7	19.3			2014-01-20 01:00:00	-30.4564			2014-01-20 01:00:00	1229.17	-423.481	26.7487	-24.812			2014-01-20 01:30:00	1332.01	-296.123	13.4344	-19.114
2014-01-09 03:58:00	583.424	-432.8	34.1			2014-01-20 02:00:00	-30.558			2014-01-20 02:00:00	1287.38	-416.676	25.7679	-25.115			2014-01-20 02:30:00	1328.27	-296.599	13.4415	-19.191
2014-01-09 04:31:00	613.365	-433.6	41.1			2014-01-20 03:00:00	-31.1287			2014-01-20 03:00:00	1257.75	-417.545	25.9019	-25.143			2014-01-20 03:30:00	1330.73	-296.796	13.5022	-19.037
2014-01-09 05:16:00	638.959	-429.3	41.3			2014-01-20 04:00:00	-30.5425			2014-01-20 04:00:00	1223.63	-420.17	26.1017	-25.056			2014-01-20 04:30:00	1336.55	-296.83	13.527	-18.815
2014-01-09 05:49:00	671.343	-426.2	43.3			2014-01-20 05:00:00	-30.3208			2014-01-20 05:00:00	1205.12	-423.242	26.1732	-24.936			2014-01-20 05:30:00	1334.68	-297.042	13.5258	-18.603
2014-01-09 06:22:00	716.698	-422.3	34.7			2014-01-20 06:00:00	-29.239			2014-01-20 06:00:00	1188.23	-427.545	25.9933	-24.726			2014-01-20 06:30:00	1334.05	-297.172	13.5719	-18.484
2014-01-09 07:07:00	804.213	-415.7	31.5			2014-01-20 07:00:00	-27.3479			2014-01-20 07:00:00	1170.04	-432.678	26.115	-24.333			2014-01-20 07:30:00	1334.88	-297.24	13.5657	-18.471
2014-01-09 07:40:00	865.043	-413.9	30			2014-01-20 08:00:00	-25.1233			2014-01-20 08:00:00	1159.03	-437.291	27.4041	-23.842			2014-01-20 08:30:00	1336.6	-297.29	13.6136	-18.519
2014-01-09 08:13:00	960.036	-409.1	28.8			2014-01-20 09:00:00	-24.3434			2014-01-20 09:00:00	1154.25	-441.658	29.5449	-23.335			2014-01-20 09:30:00	1339.4	-297.365	13.6225	-18.547
2014-01-09 08:58:00	1100.76	-406.9	24.9			2014-01-20 10:00:00	-23.0821			2014-01-20 10:00:00	1152.79	-445.101	31.422	-22.812			2014-01-20 10:30:00	1344.09	-297.451	13.6044	-18.866
2014-01-09 09:31:00	1217.05	-401.9	23.4			2014-01-20 11:00:00	-22.1731			2014-01-20 11:00:00	1156.2	-447.362	33.9677	-22.408			2014-01-20 11:30:00	1351.28	-297.478	13.6494	-18.413
2014-01-09 10:04:00	1291.25	-400.7	26			2014-01-20 12:00:00	-21.4421			2014-01-20 12:00:00	1167.32	-448.539	35.2393	-22.047			2014-01-20 12:30:00	1368.8	-297.009	13.5963	-17.911
2014-01-09 10:49:00	1435.55	-395.4	23.1			2014-01-20 13:00:00	-20.898			2014-01-20 13:00:00	1182.05	-448.717	34.7753	-21.76			2014-01-20 13:30:00	1419.76	-294.988	13.4876	-17.686
2014-01-09 11:22:00	1536.81	-391.7	24.6			2014-01-20 14:00:00	-19.9975			2014-01-20 14:00:00	1197.58	-447.8	34.3705	-21.537			2014-01-20 14:30:00	1451.26	-293.989	13.4597	-17.609
2014-01-09 11:55:00	1626.84	-392.8	23.1			2014-01-20 15:00:00	-19.1043			2014-01-20 15:00:00	1208.79	-446.165	33.4697	-21.456			2014-01-20 15:30:00	1446.25	-294.661	13.4789	-17.754
2014-01-09 12:40:00	1641.42	-396.3	25			2014-01-20 16:00:00	-17.947			2014-01-20 16:00:00	1210.75	-444.637	31.6749	-21.507			2014-01-20 16:30:00	1433.22	-295.705	13.5042	-18.113
2014-01-09 13:13:00	1679.83	-392	32			2014-01-20 17:00:00	-18.1367			2014-01-20 17:00:00	1203.81	-443.455	29.8645	-21.784			2014-01-20 17:30:00	1420.49	-296.737	13.5833	-18.492
2014-01-09 13:46:00	1721.49	-389.6	33.2			2014-01-20 18:00:00	-20.4448			2014-01-20 18:00:00	1190.31	-442.592	27.2544	-22.19			2014-01-20 18:30:00	1407.73	-297.776	13.5969	-18.986
2014-01-09 14:31:00	1741.48	-385.1	25.7			2014-01-20 19:00:00	-21.3721			2014-01-20 19:00:00	1169.88	-442.189	26.4447	-22.796			2014-01-20 19:30:00	1391.76	-298.931	13.6443	-19.355
2014-01-09 15:04:00	1753.95	-385.6	22			2014-01-20 20:00:00	-22.3074			2014-01-20 20:00:00	1141.95	-441.46	27.9991	-23.455			2014-01-20 20:30:00	1373.33	-300.206	13.7297	-19.596
2014-01-09 15:37:00	1789.21	-385.8	25.7			2014-01-20 21:00:00	-24.3789			2014-01-20 21:00:00	1108.09	-440.549	29.0217	-24.202			2014-01-20 21:30:00	1352.93	-301.607	13.7668	-19.811
2014-01-09 16:22:00	1798.42	-387.9	24.7			2014-01-20 22:00:00	-25.6697			2014-01-20 22:00:00	1071.57	-439.949	28.8173	-24.919			2014-01-20 22:30:00	1330.78	-303.119	13.8641	-20.135
2014-01-09 16:55:00	1778.98	-390.1	23.8			2014-01-20 23:00:00	-28.7243			2014-01-20 23:00:00	1033.98	-440.444	27.715	-25.562			2014-01-20 23:30:00	1307.04	-304.734	13.9008	-20.538
2014-01-09 17:28:00	1750.73	-393.5	23.6			2014-01-21	-31.463			2014-01-21	997.421	-443.725	27.5971	-26.128			2014-01-21 00:30:00	1282.05	-306.445	13.9947	-20.872
2014-01-09 18:13:00	1671.59	-397.7	23			2014-01-21 01:00:00	-33.5348			2014-01-21 01:00:00	967.699	-450.047	28.8304	-26.553			2014-01-21 01:30:00	1256.35	-308.218	14.0345	-21.118
2014-01-09 18:46:00	1581.61	-399.1	18.3			2014-01-21 02:00:00	-33.8189			2014-01-21 02:00:00	945.342	-456.485	30.4124	-26.892			2014-01-21 02:30:00	1230.39	-310.008	14.1466	-21.274
2014-01-09 19:19:00	1466.14	-400.2	19.9			2014-01-21 03:00:00	-31.0305			2014-01-21 03:00:00	924.378	-461.993	32.5279	-27.002			2014-01-21 03:30:00	1205.17	-311.764	14.2045	-21.379
2014-01-09 20:16:00	1430.01	-394.6	25.6			2014-01-21 04:00:00	-29.3677			2014-01-21 04:00:00	901.546	-468.651	35.9155	-27.019			2014-01-21 04:30:00	1180.57	-313.465	14.2487	-21.468
2014-01-09 20:49:00	1418.35	-397.6	22.9			2014-01-21 05:00:00	-28.2805			2014-01-21 05:00:00	881.155	-475.633	40.5516	-26.784			2014-01-21 05:30:00	1157.68	-315.049	14.3468	-21.561
2014-01-09 21:22:00	1506.48	-400.4	23.9			2014-01-21 06:00:00	-27.4541			2014-01-21 06:00:00	862.584	-482.185	44.3392	-26.473			2014-01-21 06:30:00	1137.42	-316.454	14.3814	-21.465
2014-01-09 22:07:00	1401.09	-403.3	32			2014-01-21 07:00:00	-26.7436			2014-01-21 07:00:00	848.535	-489.455	43.8677	-26.019			2014-01-21 07:30:00	1120.61	-317.637	14.4197	-21.159
2014-01-09 22:40:00	1361.32	-398.3	28.4			2014-01-21 08:00:00	-25.1523			2014-01-21 08:00:00	840.423	-496.469	40.6079	-25.514			2014-01-21 08:30:00	1108.04	-318.541	14.4612	-20.652
2014-01-09 23:13:00	1396.55	-404.6	22.9							2014-01-21 09:00:00	838.358	-499.63	39.4468	-24.961			2014-01-21 09:30:00	1100.81	-319.065	14.4122	-20.039
2014-01-09 23:58:00	1391.18	-402.4	32.3
2014-01-10 00:31:00	1315.93	-397.9	29.1
2014-01-10 01:05:00	1311.24	-399.8	26.1
2014-01-10 01:49:00	1279.26	-399.2	24.9
2014-01-10 02:22:00	1245.9	-402.5	22.5
2014-01-10 02:55:00	1290.32	-400.2	22.5
2014-01-10 03:40:00	1262.66	-402.6	25.4
2014-01-10 04:14:00	1327.44	-401.9	25.5
2014-01-10 04:47:00	1290.79	-407.6	24.5
2014-01-10 05:32:00	1289.62	-410.6	33.4
2014-01-10 06:05:00	1227.95	-410.4	28.9
2014-01-10 06:38:00	1334.5	-407.9	23.7
2014-01-10 07:23:00	1608.8	-395.4	22.6
2014-01-10 07:56:00	1709.61	-394.9	21.8
2014-01-10 08:29:00	1712.92	-392	26
2014-01-10 09:14:00	1634.37	-390.5	18.6
2014-01-10 09:47:00	1628.59	-392.6	24
2014-01-10 10:20:00	1773.42	-386	23.2
2014-01-10 11:05:00	1573.04	-383.4	21.3
2014-01-10 11:38:00	1458.02	-382.9	28.7
2014-01-10 12:11:00	1407.2	-386.6	25.3
2014-01-10 12:56:00	1428.2	-391.5	24.1
2014-01-10 13:29:00	1378.43	-392.7	26.8
2014-01-10 14:02:00	1435.43	-389.9	25.8
2014-01-10 14:47:00	1342.28	-384.7	31.3
2014-01-10 15:20:00	1750.86	-389.9	22.9
2014-01-10 15:53:00	1873.6	-391.8	25.8
2014-01-10 16:38:00	1895.77	-391.8	28
2014-01-10 17:11:00	1899.6	-396.4	23.7
2014-01-10 17:44:00	1863.34	-397.2	27.9
2014-01-10 18:29:00	1769.55	-398.5	28.2
2014-01-10 19:02:00	1683.26	-401.7	22.3
2014-01-10 20:28:00	1647.46	-401	25.8
2014-01-10 21:01:00	1501.83	-404.6	20
2014-01-10 21:34:00	1284.15	-405.1	23.6
2014-01-10 22:19:00	956.289	-408.5	20.8
2014-01-10 22:52:00	887.63	-408.3	21.6
2014-01-10 23:25:00	870.049	-398.5	29.5
2014-01-11 00:10:00	874.959	-394.5	29.2
2014-01-11 00:43:00	973.234	-396.1	27.9
2014-01-11 01:16:00	1099.87	-394.6	23.7
2014-01-11 02:01:00	1274.26	-394.2	19.9
2014-01-11 02:32:00	970.44	-412.5	24.7
2014-01-11 03:07:00	757.984	-418.6	30.7
2014-01-11 03:52:00	695.567	-420.2	31.8
2014-01-11 04:25:00	711.923	-421	27
2014-01-11 04:58:00	721.679	-420.4	29.8
2014-01-11 05:43:00	776.092	-415.3	29.4
2014-01-11 06:16:00	812.102	-413.5	32.9
2014-01-11 06:49:00	850.483	-413	27
2014-01-11 07:34:00	902.982	-411.6	33.6
2014-01-11 08:07:00	950.623	-409.8	33.2
2014-01-11 08:40:00	1019.43	-407.6	33.7
2014-01-11 09:25:00	1096.87	-405.9	33
2014-01-11 09:58:00	1165.6	-403.8	30.8
2014-01-11 10:31:00	1231.85	-402.2	30.7
2014-01-11 11:16:00	1365.83	-400.2	20.2
2014-01-11 11:49:00	1463.72	-397	23
2014-01-11 12:22:00	1539.27	-395.2	24.4
2014-01-11 13:07:00	1599.55	-394.1	24.4
2014-01-11 13:40:00	1649.98	-393.8	23
2014-01-11 14:13:00	1718.93	-391.6	22.4
2014-01-11 14:58:00	1795.05	-387.9	22.3
2014-01-11 15:31:00	1787.79	-387.6	20.9
2014-01-11 16:04:00	1778.21	-388.8	20.5
2014-01-11 16:49:00	1785.58	-389.7	22.6
2014-01-11 17:22:00	1764.26	-390.9	22.2
2014-01-11 17:55:00	1708.33	-395	22.1
2014-01-11 18:40:00	1579.37	-401.6	28
2014-01-11 19:13:00	1457.66	-406.5	23.8
2014-01-11 19:55:00	1282.05	-408.7	23.5
2014-01-11 20:39:00	1148	-410.7	22.6
2014-01-11 21:12:00	1051.91	-415.9	20.9
2014-01-11 21:45:00	960.036	-417.4	21.4
2014-01-11 22:30:00	847.164	-421	31.8
2014-01-11 23:03:00	798.181	-422.8	26.6
2014-01-11 23:36:00	717.295	-420.9	31.6
2014-01-12 00:21:00	631.015	-429.2	24.9
2014-01-12 00:54:00	600.891	-426.4	30.7
2014-01-12 01:27:00	568.524	-430	43.7
2014-01-12 02:12:00	557.849	-425.9	42.1
2014-01-12 02:45:00	592.478	-420.8	45.8
2014-01-12 03:18:00	664.486	-421.7	47.3
2014-01-12 04:03:00	720.683	-431.3	34.3
2014-01-12 04:36:00	790.224	-426.6	40.6
2014-01-12 05:09:00	856.508	-419	35.3
2014-01-12 05:54:00	1030.88	-408.5	26.8
2014-01-12 06:27:00	1163.79	-406.1	32.9
2014-01-12 07:00:00	1318.51	-400.6	26.9
2014-01-12 07:45:00	1424.71	-394.2	23.3
2014-01-12 08:18:00	1438.92	-391.6	21
2014-01-12 08:51:00	1504.89	-389.6	23.2
2014-01-12 09:36:00	1421.11	-381.1	27
2014-01-12 10:09:00	1486.69	-376.8	24.2
2014-01-12 10:42:00	1516.53	-379.1	22.2
2014-01-12 11:27:00	1561.01	-382	19.2
2014-01-12 12:00:00	1567.95	-382.4	18.3
2014-01-12 12:33:00	1598.18	-376.7	21.1
2014-01-12 13:18:00	1528.56	-374	16
2014-01-12 13:51:00	1516.16	-373.4	17.3
2014-01-12 14:24:00	1509.05	-372.9	21.1
2014-01-12 15:09:00	1455.6	-376.2	23.3
2014-01-12 15:42:00	1443.87	-375.6	22
2014-01-12 16:15:00	1447.74	-372.8	17.7
2014-01-12 17:00:00	1356.35	-375.4	21
2014-01-12 17:33:00	1399.66	-374.6	21
2014-01-12 18:06:00	1416.91	-375.2	20.9
2014-01-12 18:51:00	1451.61	-375.4	22.7
2014-01-12 19:24:00	1505.38	-377	24.7
2014-01-12 20:05:00	1567.46	-378.5	21.6
2014-01-12 20:50:00	1696.99	-385.3	19.5
2014-01-12 21:23:00	1754.72	-381.5	19
2014-01-12 21:56:00	1643.93	-378.7	22.5
2014-01-12 22:41:00	1638.52	-373.7	21.6
2014-01-12 23:14:00	1645.57	-374.2	23.7
2014-01-12 23:47:00	1640.41	-378.7	23.4
2014-01-13 00:32:00	1597.8	-387.3	25.8
2014-01-13 01:05:00	1408.99	-396.3	24.2
2014-01-13 01:38:00	1253.06	-400.8	23.5
2014-01-13 02:23:00	1109.34	-399.7	27.7
2014-01-13 02:56:00	1013.45	-398.5	36.2
2014-01-13 03:29:00	856.819	-408.1	37.1
2014-01-13 04:14:00	795.628	-402.8	42.9
2014-01-13 04:47:00	792.976	-410	30
2014-01-13 05:20:00	800.633	-410.2	34.4
2014-01-13 06:05:00	838.157	-407.1	28.4
2014-01-13 06:38:00	878.933	-404.1	33.5
2014-01-13 07:11:00	933.359	-406.1	32.5
2014-01-13 07:56:00	1102.43	-402.4	30.3
2014-01-13 08:29:00	1113.8	-404.2	32
2014-01-13 09:02:00	1267.65	-402.3	28.1
2014-01-13 09:47:00	1296.97	-398.5	30.3
2014-01-13 10:20:00	1347.48	-394	27.1
2014-01-13 10:53:00	1435.43	-392.1	24.4
2014-01-13 11:38:00	1523.65	-390	29.4
2014-01-13 12:11:00	1554.21	-387	23
2014-01-13 12:44:00	1646.96	-384.5	23.4
2014-01-14 14:24:00	1937.44	-376.2	25.3
2014-01-14 14:57:00	1838.82	-379	27.4
2014-01-14 15:30:00	1845.89	-381	22.6
2014-01-14 16:15:00	1782.48	-382.1	22.8
2014-01-14 16:48:00	1748.93	-386.3	24.6
2014-01-14 17:21:00	1743.15	-391.4	24.4
2014-01-14 18:06:00	1702.72	-396	25.8
2014-01-14 18:39:00	1587.96	-401.9	25.7
2014-01-14 19:12:00	1490.11	-403	25.8
2014-01-14 19:57:00	1292.77	-403.9	31.7
2014-01-14 20:30:00	1203.44	-409.4	27.5
2014-01-14 21:03:00	1102.99	-413.7	29.3
2014-01-14 21:48:00	981.522	-414.8	36.1
2014-01-14 22:21:00	877.364	-424.8	35.6
2014-01-14 22:54:00	807.694	-425.1	42.9
2014-01-14 23:39:00	724.273	-427	35.4
2014-01-15 00:12:00	672.913	-427.1	42.7
2014-01-15 00:45:00	636.341	-429.3	34.8
2014-01-15 01:30:00	618.465	-428.6	46.3
2014-01-15 02:03:00	594.675	-430	43.1
2014-01-15 02:36:00	595.248	-428.6	47.3
2014-01-15 03:21:00	600.987	-428.5	37.2
2014-01-15 03:54:00	617.695	-421.3	40.6
2014-01-15 04:27:00	654.522	-419.3	39.2
2014-01-15 05:12:00	690.134	-419.1	34.3
2014-01-15 05:45:00	737.173	-411	36.1
2014-01-15 06:18:00	783.811	-418.8	32
2014-01-15 07:03:00	868.067	-413.1	35.4
2014-01-15 07:36:00	925.82	-410.5	39.5
2014-01-15 08:09:00	988.208	-407.8	39.1
2014-01-15 08:54:00	1088.21	-403.5	39.4
2014-01-15 09:27:00	1162.77	-401.8	39
2014-01-15 10:00:00	1243.6	-399	33.8
2014-01-15 10:45:00	1332.15	-401.1	26.8
2014-01-15 11:18:00	1419.55	-402.5	30.6
2014-01-15 11:51:00	1525.86	-396.4	28
2014-01-15 12:36:00	1599.18	-395.4	25.5
2014-01-15 13:09:00	1661.98	-390.5	27.5
2014-01-15 13:42:00	1697.75	-389.9	27.8
2014-01-15 14:39:00	1747.52	-391.3	24.1
2014-01-15 15:12:00	1756.4	-391.3	21.2
2014-01-15 15:45:00	1774.85	-391.2	26
2014-01-15 16:30:00	1799.46	-392.2	28.7
2014-01-15 17:03:00	1814.15	-395.7	29.5
2014-01-15 17:36:00	1778.98	-397.5	26
2014-01-15 18:21:00	1608.42	-402.1	23.8
2014-01-15 18:54:00	1527.33	-405.4	27.1
2014-01-15 19:27:00	1475.98	-406.1	26.7
2014-01-15 20:12:00	1316.75	-404.2	24.9
2014-01-15 20:45:00	1208.24	-404.1	28.8
2014-01-15 21:18:00	1200.36	-406	28.8
2014-01-15 22:03:00	1121.4	-406.6	32.2
2014-01-15 22:36:00	1107	-406.1	27.9
2014-01-15 23:09:00	1170.13	-406.9	30
2014-01-15 23:54:00	1059.27	-410.7	3
2014-01-16 00:27:00	953.936	-408.6	14.1
2014-01-16 01:00:00	861.605	-411.4	20.6
2014-01-16 01:45:00	848.409	-410.9	34.4
2014-01-16 02:18:00	934.422	-407.8	26.6
2014-01-16 02:51:00	976.353	-405.2	27.1
2014-01-16 03:36:00	1198.99	-395.8	17.4
2014-01-16 04:09:00	1150.36	-399.2	18.2
2014-01-16 04:42:00	1070.96	-401	27
2014-01-16 05:27:00	1198.31	-396.3	27.6
2014-01-16 06:00:00	1170.24	-392.1	27
2014-01-16 06:33:00	991.016	-408.2	26.5
2014-01-16 07:18:00	896.139	-415	34.4
2014-01-16 07:51:00	954.043	-415	30.9
2014-01-16 08:24:00	1026.84	-416.3	28
2014-01-16 09:09:00	1115.03	-416	31.8
2014-01-16 09:42:00	1144.06	-419.9	42.9
2014-01-16 10:15:00	1188.17	-420.1	41.1
2014-01-16 11:00:00	1345.12	-421.5	40.1
2014-01-16 11:33:00	1439.65	-417.3	37.9
2014-01-16 12:06:00	1516.65	-412	38.6
2014-01-16 12:51:00	1609.3	-410.1	34.1
2014-01-16 13:24:00	1689.36	-410.2	32.5
2014-01-16 14:47:00	1772.26	-404.8	29.5
2014-01-16 15:20:00	1777.56	-408.2	31.9
2014-01-16 15:53:00	1785.32	-408.7	30.3
2014-01-16 16:38:00	1801.54	-416.8	31.2
2014-01-16 17:11:00	1792.45	-418.7	35.4
2014-01-16 17:44:00	1747.9	-420.9	41.4
2014-01-16 18:29:00	1536.81	-428.1	47.1
2014-01-16 19:02:00	1383.9	-432.5	46.7
2014-01-16 19:35:00	1210.64	-434.3	44.1
2014-01-16 20:20:00	1083.56	-436.5	36.8
2014-01-16 20:53:00	983.138	-429.4	32.8
2014-01-16 21:26:00	901.401	-431.4	41.1
2014-01-16 22:11:00	784.93	-433.2	48.9
2014-01-16 22:44:00	735.87	-432.9	40.9
2014-01-16 23:17:00	693.096	-433.9	38.9
2014-01-17 00:02:00	630.628	-441.7	16.2
2014-01-17 07:26:00	676.644	-448.6	26.4
2014-01-17 07:59:00	709.539	-450.9	23.5
2014-01-17 08:32:00	763.638	-443.8	22
2014-01-17 09:17:00	868.693	-430.1	49.8
2014-01-17 09:50:00	935.06	-431.5	42.2
2014-01-17 10:23:00	1040.07	-428	43.6
2014-01-17 11:08:00	1127.44	-424.8	46.6
2014-01-17 11:41:00	1196.14	-427.8	42
2014-01-17 12:14:00	1260.81	-430.1	38.9
2014-01-17 12:59:00	1302.35	-429.9	39.7
2014-01-17 13:32:00	1318.39	-430.6	40.9
2014-01-17 14:16:00	1316.4	-430.9	45.3
2014-01-17 15:00:00	1322.03	-429.4	47
2014-01-17 15:33:00	1302.35	-430.3	46.2
2014-01-17 16:06:00	1292.19	-432.3	42.2
2014-01-17 16:51:00	1265.33	-429.8	45.4
2014-01-17 17:24:00	1216.48	-432.1	44.7
2014-01-17 17:57:00	1143.04	-434.2	43.3
2014-01-17 18:42:00	1030.12	-437.5	42.8
2014-01-17 19:15:00	930.171	-437.6	40.4
2014-01-17 19:48:00	847.579	-437.7	41.1
2014-01-17 20:33:00	751.032	-436.5	42.3
2014-01-17 21:06:00	687.274	-438.7	39.4
2014-01-17 21:39:00	645.758	-445.3	52.7
2014-01-17 22:24:00	549.565	-441.3	47.8
2014-01-17 22:57:00	547.873	-442.4	41.2
2014-01-17 23:30:00	527.469	-441	46.3
2014-01-18 00:15:00	462.527	-442.2	54.4
2014-01-18 00:48:00	452.448	-444.7	42.3
2014-01-18 01:21:00	451.089	-444.7	49.7
2014-01-18 07:40:00	514.446	-445.2	68.7
2014-01-18 08:13:00	546.37	-445.6	48.2
2014-01-18 08:46:00	598.403	-441.5	61.7
2014-01-18 09:31:00	670.363	-435.9	53.9
2014-01-18 10:04:00	706.362	-434.1	56.9
2014-01-18 10:37:00	710.632	-436.5	53.7
2014-01-18 11:22:00	807.489	-444.5	44.1
2014-01-18 11:55:00	816.824	-442.7	43.4
2014-01-18 12:28:00	848.823	-444.4	51
2014-01-18 13:13:00	894.772	-444.4	50.6
2014-01-18 13:46:00	925.183	-442.8	55.7
2014-01-18 14:27:00	936.763	-441.5	53.2
2014-01-18 15:12:00	951.691	-439.5	50.4
2014-01-18 15:45:00	949.768	-434.2	53.1
2014-01-18 16:18:00	947.953	-436.3	48.7
2014-01-18 17:03:00	933.784	-434.5	40.2
2014-01-18 17:36:00	911.951	-438.5	36
2014-01-18 18:09:00	894.772	-438.1	38.3
2014-01-18 18:54:00	855.572	-435.6	42.4
2014-01-18 19:27:00	829.071	-440.6	39.9
2014-01-18 20:00:00	776.295	-440.6	38.9
2014-01-18 20:45:00	772.34	-436.1	50.1
2014-01-18 21:18:00	745.3	-439.1	34.5
2014-01-18 21:51:00	810.154	-449.2	32.1
2014-01-18 22:36:00	740.582	-452.9	23.2
2014-01-18 23:09:00	590.856	-458.5	19.6
2014-01-18 23:42:00	459.435	-455.5	9.7
2014-01-19 04:42:00	428.993	-464.5	-2.7
2014-01-19 05:15:00	465.349	-447.8	21.1
2014-01-19 06:00:00	525.698	-443	22.6
2014-01-19 06:33:00	560.302	-449.3	11.4
2014-01-19 07:06:00	601.657	-445.2	13
2014-01-19 07:51:00	656.766	-432.3	19.1
2014-01-19 08:24:00	715.504	-425.2	31.2
2014-01-19 08:57:00	772.847	-423.6	31
2014-01-19 09:42:00	822.067	-432.8	24.5
2014-01-19 10:15:00	878.619	-429.7	27.6
2014-01-19 10:48:00	893.931	-429.2	28.8
2014-01-19 11:33:00	954.471	-425.5	32.4
2014-01-19 12:06:00	979.69	-427.4	28.1
2014-01-19 12:39:00	1024.01	-427	29.9
2014-01-19 13:24:00	1042.69	-420.9	32.9
2014-01-19 15:23:00	1113.36	-420.6	26.8
2014-01-19 15:56:00	1117.49	-417.8	33.7
2014-01-19 16:29:00	1111.35	-418.2	40.3
2014-01-19 17:14:00	1092.1	-420.2	36.8
2014-01-19 17:47:00	1055.75	-422.7	37.5
2014-01-19 18:20:00	996.963	-424.6	35.8
2014-01-19 19:05:00	884.484	-430	38.8
2014-01-19 19:38:00	834.024	-431.1	36.3
2014-01-19 20:11:00	786.151	-429.6	42.7
2014-01-19 20:56:00	699.623	-433	29.4
2014-01-19 21:29:00	657.156	-436.4	26
2014-01-19 22:02:00	587.423	-437.1	47.9
2014-01-19 22:47:00	540.18	-439.1	61.7
2014-01-19 23:20:00	528.122	-437.3	53
2014-01-19 23:53:00	518.718	-446.1	31
2014-01-20 00:38:00	497.702	-445.9	28
2014-01-20 01:11:00	499.916	-445.1	29.7
2014-01-20 01:44:00	514.538	-444	28.9
2014-01-20 02:29:00	478.682	-443.5	51.5
2014-01-20 03:02:00	484.364	-450.3	61.6
2014-01-20 03:35:00	509.902	-452	66
2014-01-20 04:21:00	538.494	-442.5	60.1
2014-01-20 04:54:00	494.845	-435.9	63.5
2014-01-20 05:27:00	488.312	-437.8	48.2
2014-01-20 06:11:00	557.284	-434	33.8
2014-01-20 06:44:00	600.221	-433.1	33.7
2014-01-20 07:17:00	675.662	-429.3	39.7
2014-01-20 08:02:00	777.106	-428	28
2014-01-20 08:35:00	821.347	-425.6	38.3
2014-01-20 09:08:00	854.221	-426	42.3
2014-01-20 09:53:00	923.593	-426	37.7
2014-01-20 10:26:00	942.833	-426.8	35.9
2014-01-20 10:59:00	977.537	-424.2	41.9
2014-01-20 11:44:00	1003.46	-424.4	38.4
2014-01-20 12:17:00	1034.16	-424.6	46.5
2014-01-20 12:50:00	1094.1	-429.7	45.3
2014-01-20 13:35:00	1099.87	-427.5	38
2014-01-20 14:15:00	1128.9	-427.9	42.3
2014-01-20 14:48:00	1143.38	-427.8	45.4
2014-01-20 15:33:00	1128.9	-425.9	47.3
2014-01-20 16:06:00	1152.62	-424.1	49.6
2014-01-20 16:39:00	1144.96	-430.5	45.8
2014-01-20 17:24:00	1131.37	-422.7	52.3
2014-01-20 17:57:00	1124.42	-423.3	38.9
2014-01-20 18:30:00	1090.77	-423.6	37.6
2014-01-20 19:15:00	1079.8	-423.2	44.2
2014-01-20 19:48:00	1068.53	-428.6	52.8
2014-01-20 20:21:00	996.097	-433.3	53.2
2014-01-20 21:06:00	972.912	-430	38.1
2014-01-20 21:39:00	952.332	-442.3	22.3
2014-01-21 02:39:00	468.721	-454	82.6
2014-01-21 03:12:00	502.963	-464.8	71.8
2014-01-21 03:45:00	560.774	-460.4	48.4
2014-01-21 04:30:00	608.081	-448.9	72.7
2014-01-21 05:03:00	636.535	-442.8	64.9
2014-01-21 05:36:00	670.363	-436.7	48.5
2014-01-21 06:21:00	674.778	-451.8	21.1
2014-01-21 06:54:00	704.577	-442.3	24.6
2014-01-21 07:27:00	762.022	-435.9	47.3
2014-01-21 08:12:00	848.823	-436.8	20.3
2014-01-21 08:45:00	899.295	-429.3	25.5
2014-01-21 09:18:00	890.674	-421.2	40.8
2014-01-21 10:03:00	931.127	-419.1	37
2014-01-21 10:36:00	989.612	-419.8	30.5
2014-01-21 11:09:00	982.923	-420.8	33.2
2014-01-21 11:54:00	996.746	-420.1	41.6
2014-01-21 12:27:00	987.453	-422.6	30.3
2014-01-21 13:00:00	962.607	-422.1	32.6

## Sheet: Fig.3
top = 3.0 m inlet	q = humidity mixing ratio in ppmv	windvel = wind velocity in m/s
bot = 0.2 m inlet	dD = deuterium in per mille	qsat = saturated mixing ratio, calculated with T2+1 (plus) and with T2-1 (minus)
weather = weather observations	dx = deuterium excess in per mille	std = mean standard deviation over 24 hours
T2 = temperature at 2 meters in celcius	winddir = wind direction in degrees
	std_top_q	std_top_dx	std_top_dD	std_ECHAM_q	std_ECHAM_dx	std_ECHAM_dD	std_ECHAM_T2	std_ECHAM_winddir	std_ECHAM_windvel	std_LMD_q	std_LMD_dx	std_LMD_dD	std_LMD_T2	std_LMD_winddir	std_LMD_windvel	std_weather_T2	std_weather_winddir	std_weather_windvel	std_bot_q	std_bot_dx	std_bot_dD
	119.644	6.40531	6.45298	63.08	4.00441	15.4243	0.378171	34.6524	0.48109	54.6452	0.423023	5.04036	0.686347	38.1621	0.356	0.967044	66.1003	1.08933	129.081	7.2734	6.74919
stack_time24h	stack_top_q	stack_top_dx	stack_top_dD	stack_ECHAM_q	stack_ECHAM_dx	stack_ECHAM_dD	stack_ECHAM_T2	stack_ECHAM_winddir	stack_ECHAM_windvel	stack_LMD_q	stack_LMD_dx	stack_LMD_dD	stack_LMD_T2	stack_LMD_winddir	stack_LMD_windvel	stack_weather_T2	stack_weather_winddir	stack_weather_windvel	stack_bot_q	stack_bot_dx	stack_bot_dD	stack_qsat_minus	stack_qsat_plus
1	-415.715	6.38725	-16.4263	-62.4273	1.04327	-3.72027	-1.94005	-12.3542	0.0815476	-60.8238	-0.0997668	-2.43443	-1.92731	-2.98475	-0.000554922	-5.26591	-15.4905	-0.204023	-468.992	8.53687	-18.935	-332.495	-465.898
2	-460.484	9.30392	-19.2797	-87.8519	2.21832	-8.06024	-2.26355	-13.677	0.172578	-85.3487	-0.0953348	-3.91836	-2.17965	-21.1287	0.0756748	-5.62429	-18.5737	-0.05884	-501.971	14.7905	-21.0589	-359.35	-488.133
3	-480.265	8.32058	-19.5863	-110.042	3.04981	-11.6387	-2.40532	-14.7549	0.264971	-106.393	-0.092513	-5.20347	-2.28959	-20.5256	0.126137	-5.53026	0.925929	-0.111498	-493.438	10.6951	-20.856	-352.586	-482.536
4	-459.379	7.08996	-16.8193	-131.27	3.71338	-15.3493	-2.44571	-15.3025	0.34238	-124.691	-0.0944695	-6.34322	-2.22748	-20.8851	0.134528	-5.00376	-18.6619	0.238108	-475.682	8.10126	-18.9196	-315.28	-451.671
5	-416.355	2.59981	-15.7589	-145.219	3.96582	-17.6854	-2.28955	-15.4431	0.413636	-140.044	-0.0859108	-7.31028	-2.04298	-21.4238	0.180034	-4.42498	-5.52695	0.327293	-422.747	6.6902	-15.7983	-276.378	-419.527
6	-365.892	2.09594	-14.1821	-149.36	3.77413	-17.4532	-2.02427	-15.3681	0.449944	-151.21	-0.0765833	-7.97092	-1.7207	-21.352	0.217271	-3.40559	-11.5523	0.28993	-350.521	1.43522	-13.0022	-195.081	-352.152
7	-276.986	1.19672	-10.5374	-142.403	3.13178	-15.4572	-1.57471	-15.152	0.478508	-155.261	-0.0683842	-8.14982	-1.28576	-20.349	0.227673	-2.15197	-15.0374	0.411935	-252.832	1.19115	-9.80373	-79.7851	-256.376
8	-173.526	0.818947	-4.88741	-126.377	2.78211	-12.5097	-1.03982	-14.7872	0.474748	-149.209	-0.0288646	-7.69651	-0.772204	-18.5376	0.213786	-0.799338	-13.3503	0.610634	-132.771	1.08282	-3.90095	60.6799	-139.454
9	-45.79	0.416169	0.832034	-104.149	1.82773	-9.62617	-0.402991	-14.3237	0.445977	-130.535	0.00331653	-6.52964	-0.212537	-16.5391	0.225002	0.591208	-25.3864	0.930653	0.412583	-1.4894	1.84349	231.028	2.7385
10	70.1843	-1.88105	3.61814	-73.1365	0.883345	-6.57322	0.253176	-13.2876	0.387442	-97.2045	0.0498097	-4.69297	0.348796	-14.5054	0.220184	1.5342	-30.7137	1.03533	141.177	-2.8894	5.87405	346.452	99.0739
11	173.908	-0.886609	7.32092	-37.6641	0.066171	-3.20544	0.884287	-11.8563	0.328181	-53.3276	0.0931781	-2.50727	0.871296	-12.1462	0.220588	2.37289	4.95688	1.18792	268.29	-3.00607	9.92127	463.069	196.614
12	249.965	-2.12272	9.78759	0.0255316	-0.645415	0.213874	1.46362	-9.81493	0.25303	-4.39283	0.121425	-0.213689	1.34896	-8.95212	0.227711	3.1056	22.5843	1.42515	373.848	-4.0894	14.4352	570.63	286.655
13	314.679	-3.63383	11.8098	34.8284	-1.36742	3.48055	1.92584	-6.60132	0.140825	42.8893	0.139968	1.94539	1.72246	-4.88527	0.218539	3.57297	-1.3248	1.40509	441.893	-4.93663	16.5629	643.453	347.675
14	379.146	-4.24686	13.8347	65.437	-1.72312	6.03562	2.28212	-2.71116	0.00814404	90.8135	0.12942	4.07599	2.00324	-0.943881	0.169368	3.93738	15.9149	1.13946	482.445	-5.50607	17.0574	702.338	397.045
15	411.95	-5.51161	14.7543	90.0525	-1.76398	8.02375	2.4514	1.34624	-0.14247	129.167	0.121741	5.72301	2.17702	2.35045	0.0766156	4.27184	12.1966	0.833569	501.68	-6.65607	18.1435	759.638	445.126
16	439.22	-4.34216	16.0681	109.609	-2.08294	9.88808	2.47495	4.58119	-0.301828	152.389	0.107861	6.7664	2.20302	5.04879	-0.0689648	4.42641	30.7241	0.532234	512.162	-6.03107	18.6602	788.985	469.789
17	446.75	-3.87272	14.6043	122.658	-2.50705	11.6353	2.28812	6.47764	-0.453378	162.258	0.0848189	7.32774	2.01619	6.6548	-0.246684	4.32167	-2.45174	-0.238768	486.896	-4.7894	16.2852	771.821	455.399
18	401.791	-4.22272	11.7348	131.678	-2.93284	13.2239	1.97762	6.71384	-0.554352	158.917	0.0730948	7.41831	1.68735	7.11774	-0.337742	3.81249	20.3885	-1.21508	377.017	-5.58107	11.849	681.924	379.934
19	288.821	-2.58661	9.30703	131.639	-3.18934	14.182	1.48034	25.6589	-0.602933	145.437	0.0345903	7.1219	1.2328	6.75093	-0.374549	3.01862	6.40013	-1.83142	197.22	-5.0144	6.55182	552.735	271.618
20	183.892	-2.10883	6.65703	126.399	-3.28807	14.5322	0.928954	25.3179	-0.583679	124.908	0.00358457	6.51762	0.703019	26.8437	-0.353928	2.08652	8.43593	-1.99915	46.5223	-2.64444	3.16712	432.373	171.103
21	62.7069	-2.97828	4.45703	118.982	-2.91216	13.9811	0.317843	25.8349	-0.528632	101.212	-0.0301272	5.6778	0.230074	27.0031	-0.307948	0.337456	4.00703	-1.67918	-90.5818	-3.95885	-0.74262	200.995	-22.3144
22	-44.1952	-1.70605	0.0125892	100.46	-2.06506	11.6703	-0.272935	26.4087	-0.449726	75.9173	-0.0625156	4.64114	-0.21487	27.2231	-0.290775	-0.949311	0.121904	-1.43485	-161.551	-0.0467374	-3.17454	59.17	-140.51
23	-118.63	2.25597	-1.37664	79.8606	-1.23068	8.72414	-0.800602	26.6907	-0.358098	50.0437	-0.0982488	3.48336	-0.648315	47.8132	-0.279351	-1.78781	19.2278	-0.864659	-222.935	2.06843	-4.58171	-22.4126	-208.35
24	-165.796	-0.38521	-5.94429	58.271	-0.747776	5.68817	-1.26877	26.4038	-0.266818	24.4865	-0.13009	2.27192	-1.02281	48.3528	-0.272617	-2.44604	12.1857	-0.729847	-255.539	2.04738	-9.57748	-88.403	-263.249

## Sheet: Fig.4
patch1 = hard patch	T2 = temperature at 2 meters in celcius
patch2 = medium patch	qsat = saturated mixing ratio, calculated with T2
patch3 = soft patch
q = humidity mixing ratio in ppmv
dD and d18O = isotopic composition in per mille
SSDCsi_patch1_time	SSDCsi_patch1_d18O	SSDCsi_patch1_dD				SSDCsi_patch2_time	SSDCsi_patch2_d18O	SSDCsi_patch2_dD				SSDCsi_patch3_time	SSDCsi_patch3_d18O	SSDCsi_patch3_dD			time_mean	dD_patch_mean	d18O_patch_mean			weather_time	weather_T2			top_time	top_q	top_dD			qsat_time	qsat_value
2014-01-08 22:00:00	-39.75	-323.3				2014-01-08 22:00:00	-37.21	-302.3				2014-01-08 22:10:00	-37.43	-296.6			2014-01-08 23:20:00	-0.679538	-0.0422138			2014-01-08 21:00:00	-1.56009			2014-01-08 21:07:48	-124.843	-8.41207			2014-01-08 21:00:00	-153.336
2014-01-08 22:45:00	-38.55	-314.4				2014-01-08 22:50:00	-37.02	-300.8				2014-01-08 22:55:00	-37.38	-296.2			2014-01-09 03:18:20	-1.20176	-0.177769			2014-01-08 22:00:00	-3.10108			2014-01-08 21:52:51	-260.023	-12.1121			2014-01-08 22:00:00	-307.602
2014-01-09 00:45:00	-38.99	-316.8				2014-01-08 23:50:00	-37.03	-301				2014-01-08 23:55:00	-37.49	-296.4			2014-01-09 08:06:15	-0.816564	-0.152491			2014-01-08 23:00:00	-4.4396			2014-01-08 22:25:48	-347.927	-14.5121			2014-01-08 23:00:00	-424.825
2014-01-09 02:45:00	-39.19	-318.7				2014-01-09 00:50:00	-37.08	-301.6				2014-01-09 01:55:00	-37.58	-297			2014-01-09 11:18:45	1.18764	0.171551			2014-01-09	-5.4314			2014-01-08 22:58:49	-412.056	-16.9121			2014-01-09	-502.648
2014-01-09 04:45:00	-38.97	-316.6				2014-01-09 01:50:00	-37.12	-301.9				2014-01-09 03:00:00	-37.59	-296.1			2014-01-09 14:53:53	0.541921	0.126348			2014-01-09 01:00:00	-6.29468			2014-01-08 23:43:49	-481.737	-20.1121			2014-01-09 01:00:00	-564.762
2014-01-09 08:45:00	-38.81	-315.6				2014-01-09 02:50:00	-37.12	-301.3				2014-01-09 04:00:00	-37.62	-296.7			2014-01-09 19:15:30	0.800082	0.135008			2014-01-09 02:00:00	-6.8614			2014-01-09 00:16:49	-517.463	-23.1121			2014-01-09 02:00:00	-602.752
2014-01-09 09:45:00	-38.87	-315.1				2014-01-09 03:50:00	-37.14	-301.4				2014-01-09 07:30:00	-37.72	-297.3			2014-01-09 23:30:33	0.220462	0.0177862			2014-01-09 03:00:00	-7.01354			2014-01-09 00:49:50	-557.415	-23.9121			2014-01-09 03:00:00	-612.552
2014-01-09 10:45:00	-38.49	-312.7				2014-01-09 04:50:00	-37.07	-301.1				2014-01-09 10:00:00	-37.62	-297.1			2014-01-10 03:43:45	-0.342422	-0.120358			2014-01-09 04:00:00	-6.88206			2014-01-09 01:34:50	-603.448	-27.8121			2014-01-09 04:00:00	-603.65
2014-01-09 11:45:00	-38.28	-311.5				2014-01-09 07:20:00	-37.09	-301.2				2014-01-09 13:00:00	-37.44	-296.3			2014-01-10 07:17:30	-0.237677	-0.0778368			2014-01-09 05:00:00	-6.2514			2014-01-09 02:07:51	-617.283	-27.6121			2014-01-09 05:00:00	-560.811
2014-01-09 12:45:00	-38.58	-314.6				2014-01-09 08:50:00	-37.18	-301.4				2014-01-09 14:00:00	-37.31	-295.1								2014-01-09 06:00:00	-5.20058			2014-01-09 02:40:50	-631.916	-28.9121			2014-01-09 06:00:00	-483.752
2014-01-09 14:45:00	-38.69	-315.2				2014-01-09 10:50:00	-36.82	-299.5				2014-01-09 15:00:00	-37.27	-295								2014-01-09 07:00:00	-3.70911			2014-01-09 03:25:50	-646.476	-25.7121			2014-01-09 07:00:00	-360.586
2014-01-09 18:45:00	-38.57	-314.2				2014-01-09 11:50:00	-36.75	-299.6				2014-01-09 16:00:00	-37.26	-294.7								2014-01-09 08:00:00	-2.17698			2014-01-09 03:58:50	-658.013	-25.8121			2014-01-09 08:00:00	-215.283
2014-01-09 19:45:00	-38.65	-314.9				2014-01-09 12:50:00	-36.8	-299.8				2014-01-09 17:00:00	-37.16	-295								2014-01-09 09:00:00	-0.533044			2014-01-09 04:31:52	-628.072	-26.6121			2014-01-09 09:00:00	-34.7659
2014-01-09 22:45:00	-38.74	-314.4				2014-01-09 13:50:00	-37.11	-300.8				2014-01-09 18:55:00	-37.33	-296								2014-01-09 10:00:00	0.803514			2014-01-09 05:16:52	-602.478	-22.3121			2014-01-09 10:00:00	133.471
2014-01-09 23:45:00	-39.14	-317.6				2014-01-09 14:50:00	-36.74	-299.1				2014-01-09 19:55:00	-37.31	-294.7								2014-01-09 11:00:00	2.09745			2014-01-09 05:49:52	-570.094	-19.2121			2014-01-09 11:00:00	316.793
2014-01-10 04:45:00	-39.16	-317.5				2014-01-09 15:50:00	-36.62	-299.3				2014-01-09 20:55:00	-37.32	-294.9								2014-01-09 12:00:00	2.97286			2014-01-09 06:22:53	-524.739	-15.3121			2014-01-09 12:00:00	452.845
2014-01-10 05:45:00	-39.05	-317.2				2014-01-09 16:50:00	-36.84	-299.6				2014-01-09 22:55:00	-37.36	-294.7								2014-01-09 13:00:00	3.20925			2014-01-09 07:07:52	-437.224	-8.71207			2014-01-09 13:00:00	491.64
2014-01-10 08:45:00	-38.92	-316.9				2014-01-09 17:50:00	-36.81	-298.7				2014-01-09 23:55:00	-37.41	-294.5								2014-01-09 14:00:00	3.3486			2014-01-09 07:40:52	-376.394	-6.91207			2014-01-09 14:00:00	514.762
						2014-01-09 18:50:00	-36.85	-299.5				2014-01-10 00:55:00	-37.31	-294.3								2014-01-09 15:00:00	3.68728			2014-01-09 08:13:52	-281.401	-2.11207			2014-01-09 15:00:00	572.937
						2014-01-09 19:50:00	-36.81	-299.3				2014-01-10 02:55:00	-37.4	-294.8								2014-01-09 16:00:00	3.95187			2014-01-09 08:58:52	-140.672	0.087931			2014-01-09 16:00:00	619.487
						2014-01-09 20:50:00	-37.06	-300.3				2014-01-10 03:55:00	-37.46	-295								2014-01-09 17:00:00	3.77368			2014-01-09 09:31:53	-24.387	5.08793			2014-01-09 17:00:00	588.81
						2014-01-09 21:50:00	-36.96	-300.6				2014-01-10 04:55:00	-37.46	-294.4								2014-01-09 18:00:00	3.15122			2014-01-09 10:04:53	49.8167	6.28793			2014-01-09 18:00:00	483.967
						2014-01-09 22:50:00	-36.8	-300.3				2014-01-10 05:55:00	-37.48	-294.8								2014-01-09 19:00:00	1.91761			2014-01-09 10:49:52	194.111	11.5879			2014-01-09 19:00:00	292.278
						2014-01-09 23:50:00	-36.99	-300.8				2014-01-10 08:45:00	-37.37	-294.8								2014-01-09 20:00:00	1.18269			2014-01-09 11:22:52	295.371	15.2879			2014-01-09 20:00:00	187.405
						2014-01-10 00:50:00	-36.93	-300.8														2014-01-09 21:00:00	1.65482			2014-01-09 11:55:52	385.399	14.1879			2014-01-09 21:00:00	254.238
						2014-01-10 01:50:00	-37.01	-300.9														2014-01-09 22:00:00	2.0645			2014-01-09 12:40:53	399.98	10.6879			2014-01-09 22:00:00	314.787
						2014-01-10 02:50:00	-37.1	-301.1														2014-01-09 23:00:00	2.45187			2014-01-09 13:13:53	438.396	14.9879			2014-01-09 23:00:00	373.739
						2014-01-10 03:50:00	-37.08	-301.5														2014-01-10	2.18761			2014-01-09 13:46:53	480.051	17.3879			2014-01-10	333.57
						2014-01-10 04:50:00	-37.29	-302														2014-01-10 01:00:00	2.8522			2014-01-09 14:31:53	500.043	21.8879			2014-01-10 01:00:00	437.138
						2014-01-10 05:50:00	-37.03	-300.6														2014-01-10 02:00:00	2.61335			2014-01-09 15:04:53	512.514	21.3879			2014-01-10 02:00:00	399.816
						2014-01-10 08:45:00	-37.03	-300.4														2014-01-10 03:00:00	2.04433			2014-01-09 15:37:54	547.774	21.1879			2014-01-10 03:00:00	312.788
																						2014-01-10 04:00:00	1.67745			2014-01-09 16:22:54	556.984	19.0879			2014-01-10 04:00:00	258.949
																						2014-01-10 05:00:00	1.83253			2014-01-09 16:55:55	537.546	16.8879			2014-01-10 05:00:00	281.451
																						2014-01-10 06:00:00	0.56335			2014-01-09 17:28:55	509.297	13.4879			2014-01-10 06:00:00	105.592
																						2014-01-10 07:00:00	1.65728			2014-01-09 18:13:54	430.157	9.28793			2014-01-10 07:00:00	255.32
																						2014-01-10 08:00:00	3.49105								2014-01-10 08:00:00	541.092
																						2014-01-10 09:00:00	4.2686								2014-01-10 09:00:00	676.581

## Sheet: Fig.6
Mer = Merlivat and Nief, 1967
Ell = Ellehoj et al., 2013
si = RH = relative humidity set to 1.0 or 1.1
meas = observations
time	meas_dD	meas_dx	dDvap_Mer_si10	dxvap_Mer_si10	dDvap_Mer_si11	dxvap_Mer_si11	dDvap_Ell_si10	dxvap_Ell_si10	dDvap_Ell_si11	dxvap_Ell_si11			time_con	dDsnow_Mer_si10_h00	dDsnow_Mer_si11_h00	dDsnow_Ell_si10_h00	dDsnow_Ell_si11_h00
17	0	0	0	0	0	0	0	0	0	0			18	-295.251	-307.965	-286.402	-300.219
18	-2.86944	-0.35	-3.24293	1.15417	-2.84554	0.5128	-3.51948	0.85237	-3.08764	0.247951			19	-297.147	-309.881	-288.106	-301.968
19	-5.29722	1.28611	-12.0992	4.34308	-10.6217	1.94607	-13.148	3.22375	-11.5406	0.963608			20	-298.14	-310.912	-288.885	-302.813
20	-7.94722	1.76389	-20.9949	7.67486	-18.4467	3.48663	-22.8402	5.7518	-20.0661	1.79722			21	-299.177	-312.001	-289.647	-303.663
21	-10.1472	0.894444	-32.3714	12.0985	-28.4726	5.5874	-35.2691	9.17504	-31.0204	3.01634			22	-299.683	-312.589	-289.778	-303.927
22	-14.5917	2.16667	-43.5311	16.6178	-38.331	7.80523	-47.5321	12.7625	-41.856	4.41165			23	-300.355	-313.316	-290.172	-304.414
23	-15.9907	6.22966	-51.7263	20.0891	-45.5879	9.55792	-56.5703	15.5877	-49.8627	5.59239			24	-300.736	-313.736	-290.366	-304.671
24	-20.5584	3.58849	-57.2951	22.5295	-50.5281	10.814	-62.7248	17.6098	-55.3255	6.47708			25	-301.64	-314.688	-291.007	-305.396
25	-24.579	7.4179	-66.0168	26.4365	-58.2746	12.8506	-72.3809	20.8873	-63.9076	7.95352			26	-302.527	-315.606	-291.7	-306.148
26	-26.8584	10.6444	-73.2875	29.8275	-64.745	14.6494	-80.4333	23.7808	-71.0801	9.30744

## Sheet: Fig.7
Mer = Merlivat and Nief, 1967
Ell = Ellehoj et al., 2013
si = RH = relative humidity set to 1.0 or 1.1
H0 = height of the air reservoir (050 m or 100 m)
h0 = height of the snow reservoir (02 mm or 05 mm)
time	dDsnow_Mer_si10_H0050_h02_dD0290	dDsnow_Mer_si10_H0050_h02_dD0310	dDsnow_Mer_si10_H0050_h05_dD0290	dDsnow_Mer_si10_H0050_h05_dD0310	dDsnow_Mer_si10_H0100_h02_dD0290	dDsnow_Mer_si10_H0100_h02_dD0310	dDsnow_Mer_si10_H0100_h05_dD0290	dDsnow_Mer_si10_H0100_h05_dD0310	dDsnow_Mer_si11_H0050_h02_dD0290	dDsnow_Mer_si11_H0050_h02_dD0310	dDsnow_Mer_si11_H0050_h05_dD0290	dDsnow_Mer_si11_H0050_h05_dD0310	dDsnow_Mer_si11_H0100_h02_dD0290	dDsnow_Mer_si11_H0100_h02_dD0310	dDsnow_Mer_si11_H0100_h05_dD0290	dDsnow_Mer_si11_H0100_h05_dD0310	dDsnow_Ell_si10_H0050_h02_dD0290	dDsnow_Ell_si10_H0050_h02_dD0310	dDsnow_Ell_si10_H0050_h05_dD0290	dDsnow_Ell_si10_H0050_h05_dD0310	dDsnow_Ell_si10_H0100_h02_dD0290	dDsnow_Ell_si10_H0100_h02_dD0310	dDsnow_Ell_si10_H0100_h05_dD0290	dDsnow_Ell_si10_H0100_h05_dD0310	dDsnow_Ell_si11_H0050_h02_dD0290	dDsnow_Ell_si11_H0050_h02_dD0310	dDsnow_Ell_si11_H0050_h05_dD0290	dDsnow_Ell_si11_H0050_h05_dD0310	dDsnow_Ell_si11_H0100_h02_dD0290	dDsnow_Ell_si11_H0100_h02_dD0310	dDsnow_Ell_si11_H0100_h05_dD0290	dDsnow_Ell_si11_H0100_h05_dD0310
17	0	0	0	0	0	0	0	0	0	0	0	0	0	0	0	0	0	0	0	0	0	0	0	0	0	0	0	0	0	0	0	0
18	-0.0102362	0.0287547	-0.00409926	0.0115154	-0.0204325	0.0573975	-0.00819212	0.0230127	-0.0350232	0.00396763	-0.0140257	0.00158891	-0.0699102	0.00791982	-0.0280295	0.00317534	0.00701388	0.0460047	0.00280884	0.0184234	0.0140005	0.0918305	0.00561329	0.0368182	-0.0199224	0.0190684	-0.00797831	0.0076363	-0.0397674	0.0380626	-0.0159442	0.0152607
19	-0.048708	0.0875903	-0.0195632	0.03518	-0.0967566	0.173995	-0.0390196	0.0701679	-0.135488	0.000809886	-0.0544179	0.000325284	-0.269143	0.00160881	-0.108539	0.000648793	0.0129098	0.149208	0.00518514	0.0599283	0.0256449	0.296396	0.010342	0.119529	-0.0815581	0.0547402	-0.0327572	0.021986	-0.162012	0.108739	-0.0653356	0.0438519
20	-0.0919146	0.133918	-0.0370166	0.0539327	-0.181777	0.264846	-0.0736981	0.107377	-0.236127	-0.0102937	-0.095095	-0.00414559	-0.46698	-0.0203576	-0.189329	-0.00825364	0.0125925	0.238425	0.00507136	0.0960207	0.0249038	0.471527	0.0100968	0.191172	-0.144677	0.0811562	-0.0582655	0.0326839	-0.286123	0.1605	-0.116003	0.0650719
21	-0.150621	0.177619	-0.0608476	0.0717541	-0.296378	0.349502	-0.120894	0.142563	-0.361076	-0.032836	-0.145867	-0.013265	-0.710491	-0.0646115	-0.289812	-0.0263553	0.00579966	0.334039	0.00234294	0.134945	0.011412	0.657291	0.00465501	0.268112	-0.224235	0.104005	-0.0905858	0.0420159	-0.441228	0.204652	-0.179978	0.0834782
22	-0.202237	0.215463	-0.0819214	0.0872789	-0.3962	0.42211	-0.162468	0.173094	-0.471769	-0.0540688	-0.191102	-0.021902	-0.924236	-0.105925	-0.378998	-0.0434365	0.0046308	0.422331	0.00187582	0.171076	0.00907212	0.827382	0.00372018	0.339282	-0.290861	0.126839	-0.117821	0.0513794	-0.569822	0.248488	-0.233665	0.101897
23	-0.24761	0.23064	-0.100486	0.0935989	-0.483655	0.450507	-0.19904	0.185399	-0.557548	-0.0792976	-0.226265	-0.0321807	-1.08905	-0.154891	-0.448182	-0.0637429	-0.00412025	0.47413	-0.00167209	0.192413	-0.00804804	0.926114	-0.00331204	0.381127	-0.344674	0.133576	-0.139876	0.0542083	-0.673248	0.260914	-0.277064	0.107375
24	-0.277648	0.239572	-0.11281	0.0973392	-0.541298	0.467065	-0.223273	0.192654	-0.613838	-0.0966182	-0.249405	-0.0392564	-1.19673	-0.188365	-0.493624	-0.0776964	-0.00945819	0.507762	-0.0038429	0.206306	-0.0184395	0.989924	-0.00760589	0.408322	-0.379415	0.137805	-0.154158	0.055991	-0.7397	0.268663	-0.30511	0.110818
25	-0.333659	0.239622	-0.135799	0.0975261	-0.648723	0.46589	-0.268466	0.192803	-0.707666	-0.134385	-0.28802	-0.0546948	-1.37589	-0.261281	-0.569397	-0.108128	-0.0288562	0.544425	-0.0117445	0.221581	-0.0561042	1.05851	-0.0232181	0.438051	-0.441312	0.131969	-0.179614	0.0537111	-0.85803	0.256582	-0.355086	0.106184
26	-0.386506	0.230579	-0.157518	0.093971	-0.749875	0.447354	-0.311125	0.185608	-0.790066	-0.172981	-0.321987	-0.0704976	-1.53284	-0.335608	-0.635977	-0.139244	-0.0524657	0.564619	-0.0213821	0.230107	-0.101791	1.09544	-0.0422332	0.4545	-0.498221	0.118863	-0.203047	0.048442	-0.966618	0.230611	-0.401052	0.0956809

## Sheet: Fig.8
Mer = Merlivat and Nief, 1967
Ell = Ellehoj et al., 2013
kin = alpha with respect to water taking the kinetic effect into account
wat = Majoube, 1971
meas = observations
time	meas_dD	meas_dx	dDvap_nof	dxvap_nof	dDvap_wat	dxvap_wat	dDvap_mer	dxvap_mer	dDvap_ell	dxvap_ell	dDvap_kin	dxvap_kin
3	0	0	0	0	0	0	0	0	0	0	0	0
4	2.76709	-1.23063	4.09549	-1.41807	0.514409	-0.774687	0.0413049	0.107808	-0.402555	-0.114915	5.00301	-6.11948
5	3.82748	-5.72078	11.6629	-4.0383	1.51606	-2.19611	0.169785	0.304654	-1.07363	-0.341261	11.5911	-13.5918
6	5.40424	-6.22464	19.3016	-6.68321	2.58714	-3.61966	0.360752	0.499917	-1.65928	-0.580156	14.3376	-16.0615
7	9.04894	-7.12386	30.2905	-10.4881	4.29332	-5.72664	0.804567	0.681947	-2.26721	-1.05584	16.856	-15.9842
8	14.6989	-7.50164	40.2284	-13.9291	6.0477	-7.58497	1.43245	0.853137	-2.52003	-1.52647	18.2249	-15.8377
9	20.4184	-7.90441	49.6352	-17.1862	7.94776	-9.29216	2.27279	0.907417	-2.40094	-2.0947	19.9884	-15.6858
10	23.2045	-10.2016	56.2954	-19.4923	9.49861	-10.5321	3.08805	0.875057	-2.02259	-2.59293	21.4449	-15.3919
11	26.9073	-9.20719	61.171	-21.1805	10.7562	-11.4694	3.81046	0.862178	-1.58018	-3.02559	22.6087	-15.0257
12	29.3739	-10.4433	64.2465	-22.2454	11.6211	-12.0402	4.34497	0.816529	-1.1983	-3.29557	23.4383	-15.2494
13	31.3962	-11.9544	66.5908	-23.0571	12.3281	-12.4634	4.8059	0.748423	-0.836999	-3.53813	24.2306	-15.1654
14	33.4211	-12.5674	68.713	-23.792	12.9998	-12.8724	5.25582	0.689713	-0.463424	-3.75274	24.9788	-14.9847
15	34.3406	-13.8322	69.7204	-24.1408	13.3318	-13.0618	5.48288	0.663839	-0.268773	-3.85323	25.332	-15.0462
16	35.6545	-12.6627	70.5238	-24.4189	13.6049	-13.2106	5.67269	0.628873	-0.101923	-3.94809	25.6552	-15.047
17	34.1906	-12.1933	70.7404	-24.4939	13.6799	-13.2502	5.72521	0.619701	-0.0552361	-3.97346	25.7406	-15.0421

## Sheet: Fig.9
H0 = height of the air reservoir (050 m or 100 m)
h0 = height of the snow reservoir (02 mm or 05 mm)
Mer = Merlivat and Nief, 1967
Ell = Ellehoj et al., 2013
kin = alpha with respect to water taking the kinetic effect into account
wat = Majoube, 1971
time	dDsnow_wat_H0050_h02	dDsnow_wat_H0050_h05	dDsnow_wat_H0100_h02	dDsnow_wat_H0100_h05	dDsnow_mer_H0050_h02	dDsnow_mer_H0050_h05	dDsnow_mer_H0100_h02	dDsnow_mer_H0100_h05	dDsnow_ell_H0050_h02	dDsnow_ell_H0050_h05	dDsnow_ell_H0100_h02	dDsnow_ell_H0100_h05	dDsnow_kin_H0050_h02	dDsnow_kin_H0050_h05	dDsnow_kin_H0100_h02	dDsnow_kin_H0100_h05
3	0	0	0	0	0	0	0	0	0	0	0	0	0	0	0	0
4	0.1	0	0.2	0.1	0.1	0	0.2	0.1	0.1	0	0.2	0.1	0	0	0	0
5	0.3	0.1	0.5	0.2	0.3	0.1	0.6	0.2	0.3	0.1	0.6	0.3	0	0	-0.1	0
6	0.5	0.2	0.9	0.4	0.5	0.2	1	0.4	0.6	0.2	1.1	0.5	0	0	-0.1	0
7	0.8	0.3	1.6	0.7	0.9	0.4	1.8	0.8	1	0.4	2	0.8	-0.1	0	-0.1	0
8	1.2	0.5	2.4	1	1.4	0.6	2.7	1.1	1.6	0.6	3	1.3	0	0	0	0
9	1.8	0.7	3.4	1.4	2	0.8	3.9	1.6	2.2	0.9	4.3	1.8	0.3	0.1	0.6	0.2
10	2.2	0.9	4.3	1.8	2.5	1	4.9	2	2.8	1.1	5.4	2.2	0.7	0.3	1.4	0.6
11	2.6	1.1	5.1	2.1	3	1.2	5.8	2.4	3.3	1.3	6.4	2.6	1.1	0.5	2.1	0.9
12	2.9	1.2	5.7	2.3	3.3	1.3	6.5	2.7	3.6	1.5	7.1	2.9	1.5	0.6	2.8	1.2
13	3.2	1.3	6.2	2.5	3.6	1.5	7.1	2.9	3.9	1.6	7.7	3.2	1.8	0.8	3.5	1.5
14	3.4	1.4	6.7	2.7	3.9	1.6	7.6	3.1	4.2	1.7	8.3	3.4	2.2	0.9	4.2	1.8
15	3.5	1.4	7	2.8	4	1.6	7.9	3.2	4.4	1.8	8.6	3.5	2.4	1	4.5	2
16	3.6	1.5	7.2	2.9	4.1	1.7	8.2	3.3	4.5	1.8	8.9	3.6	2.6	1.1	4.8	2.1
17	3.7	1.5	7.2	2.9	4.2	1.7	8.2	3.4	4.5	1.8	9	3.7	2.7	1.1	4.9	2.2
