# Supplementary figures and images for: Isotopic exchange on the diurnal scale between near-surface snow and lower atmospheric water vapor at Kohnen station, East Antarctica
Source: Copernicus journal article supplement (doi:10.5194/tc-2016-4), 2016-02-22

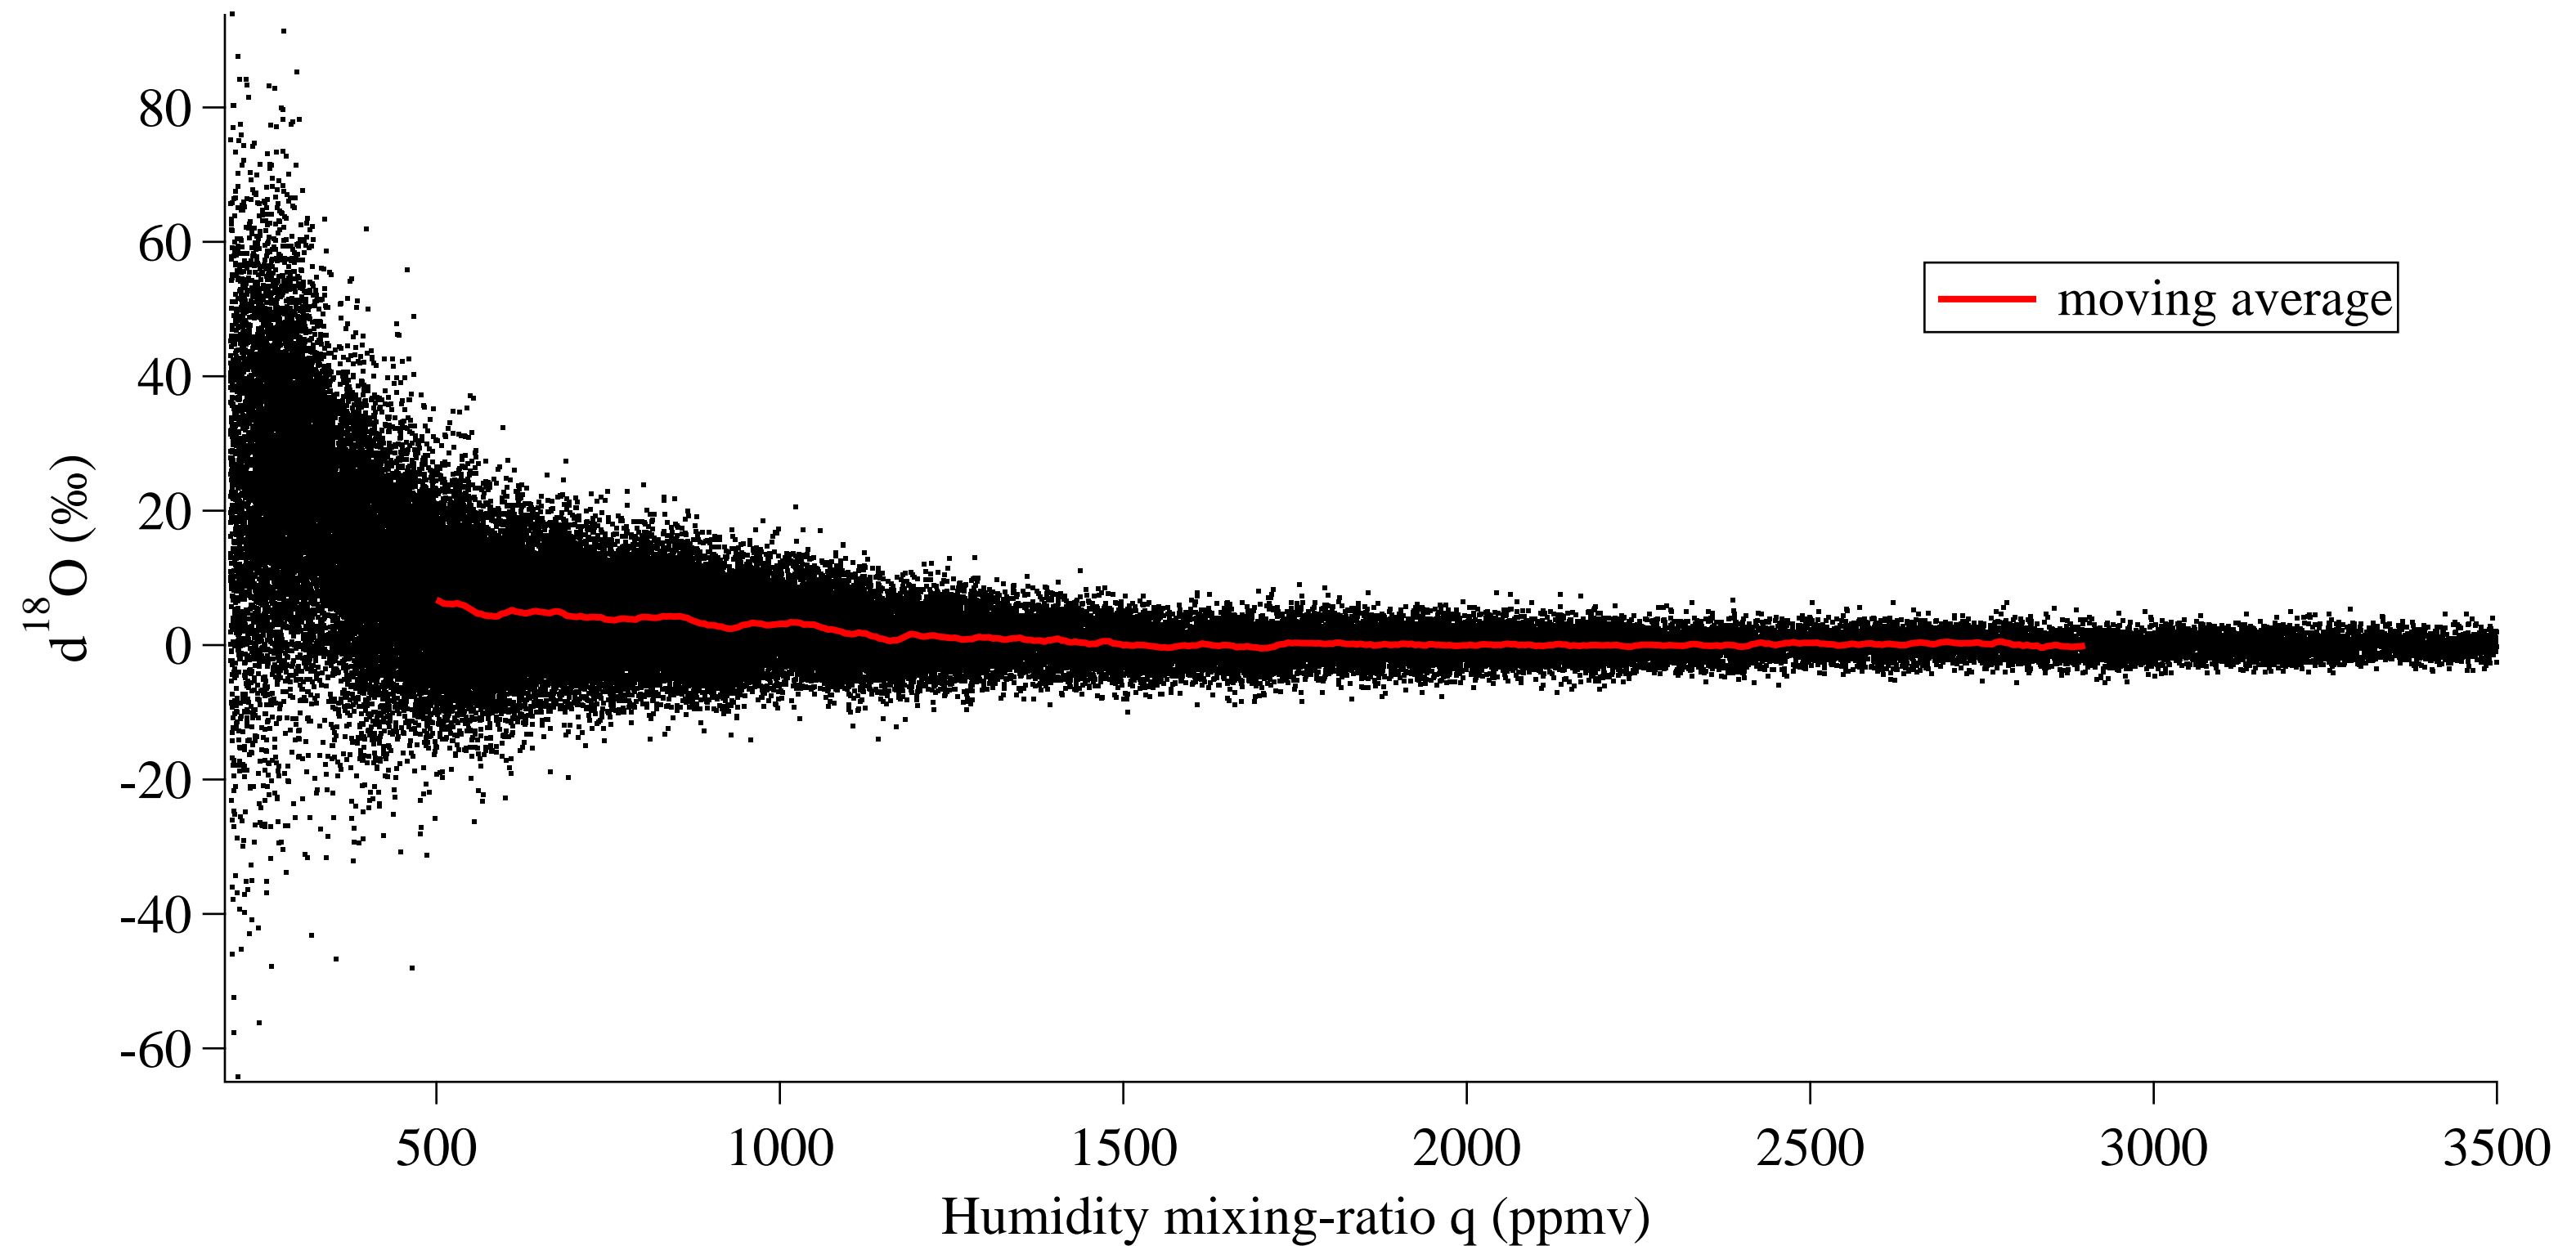

Supplement: Supplementary file 1 [file tc-2016-4-supplement.zip › supplementary_material/FigS1.pdf]

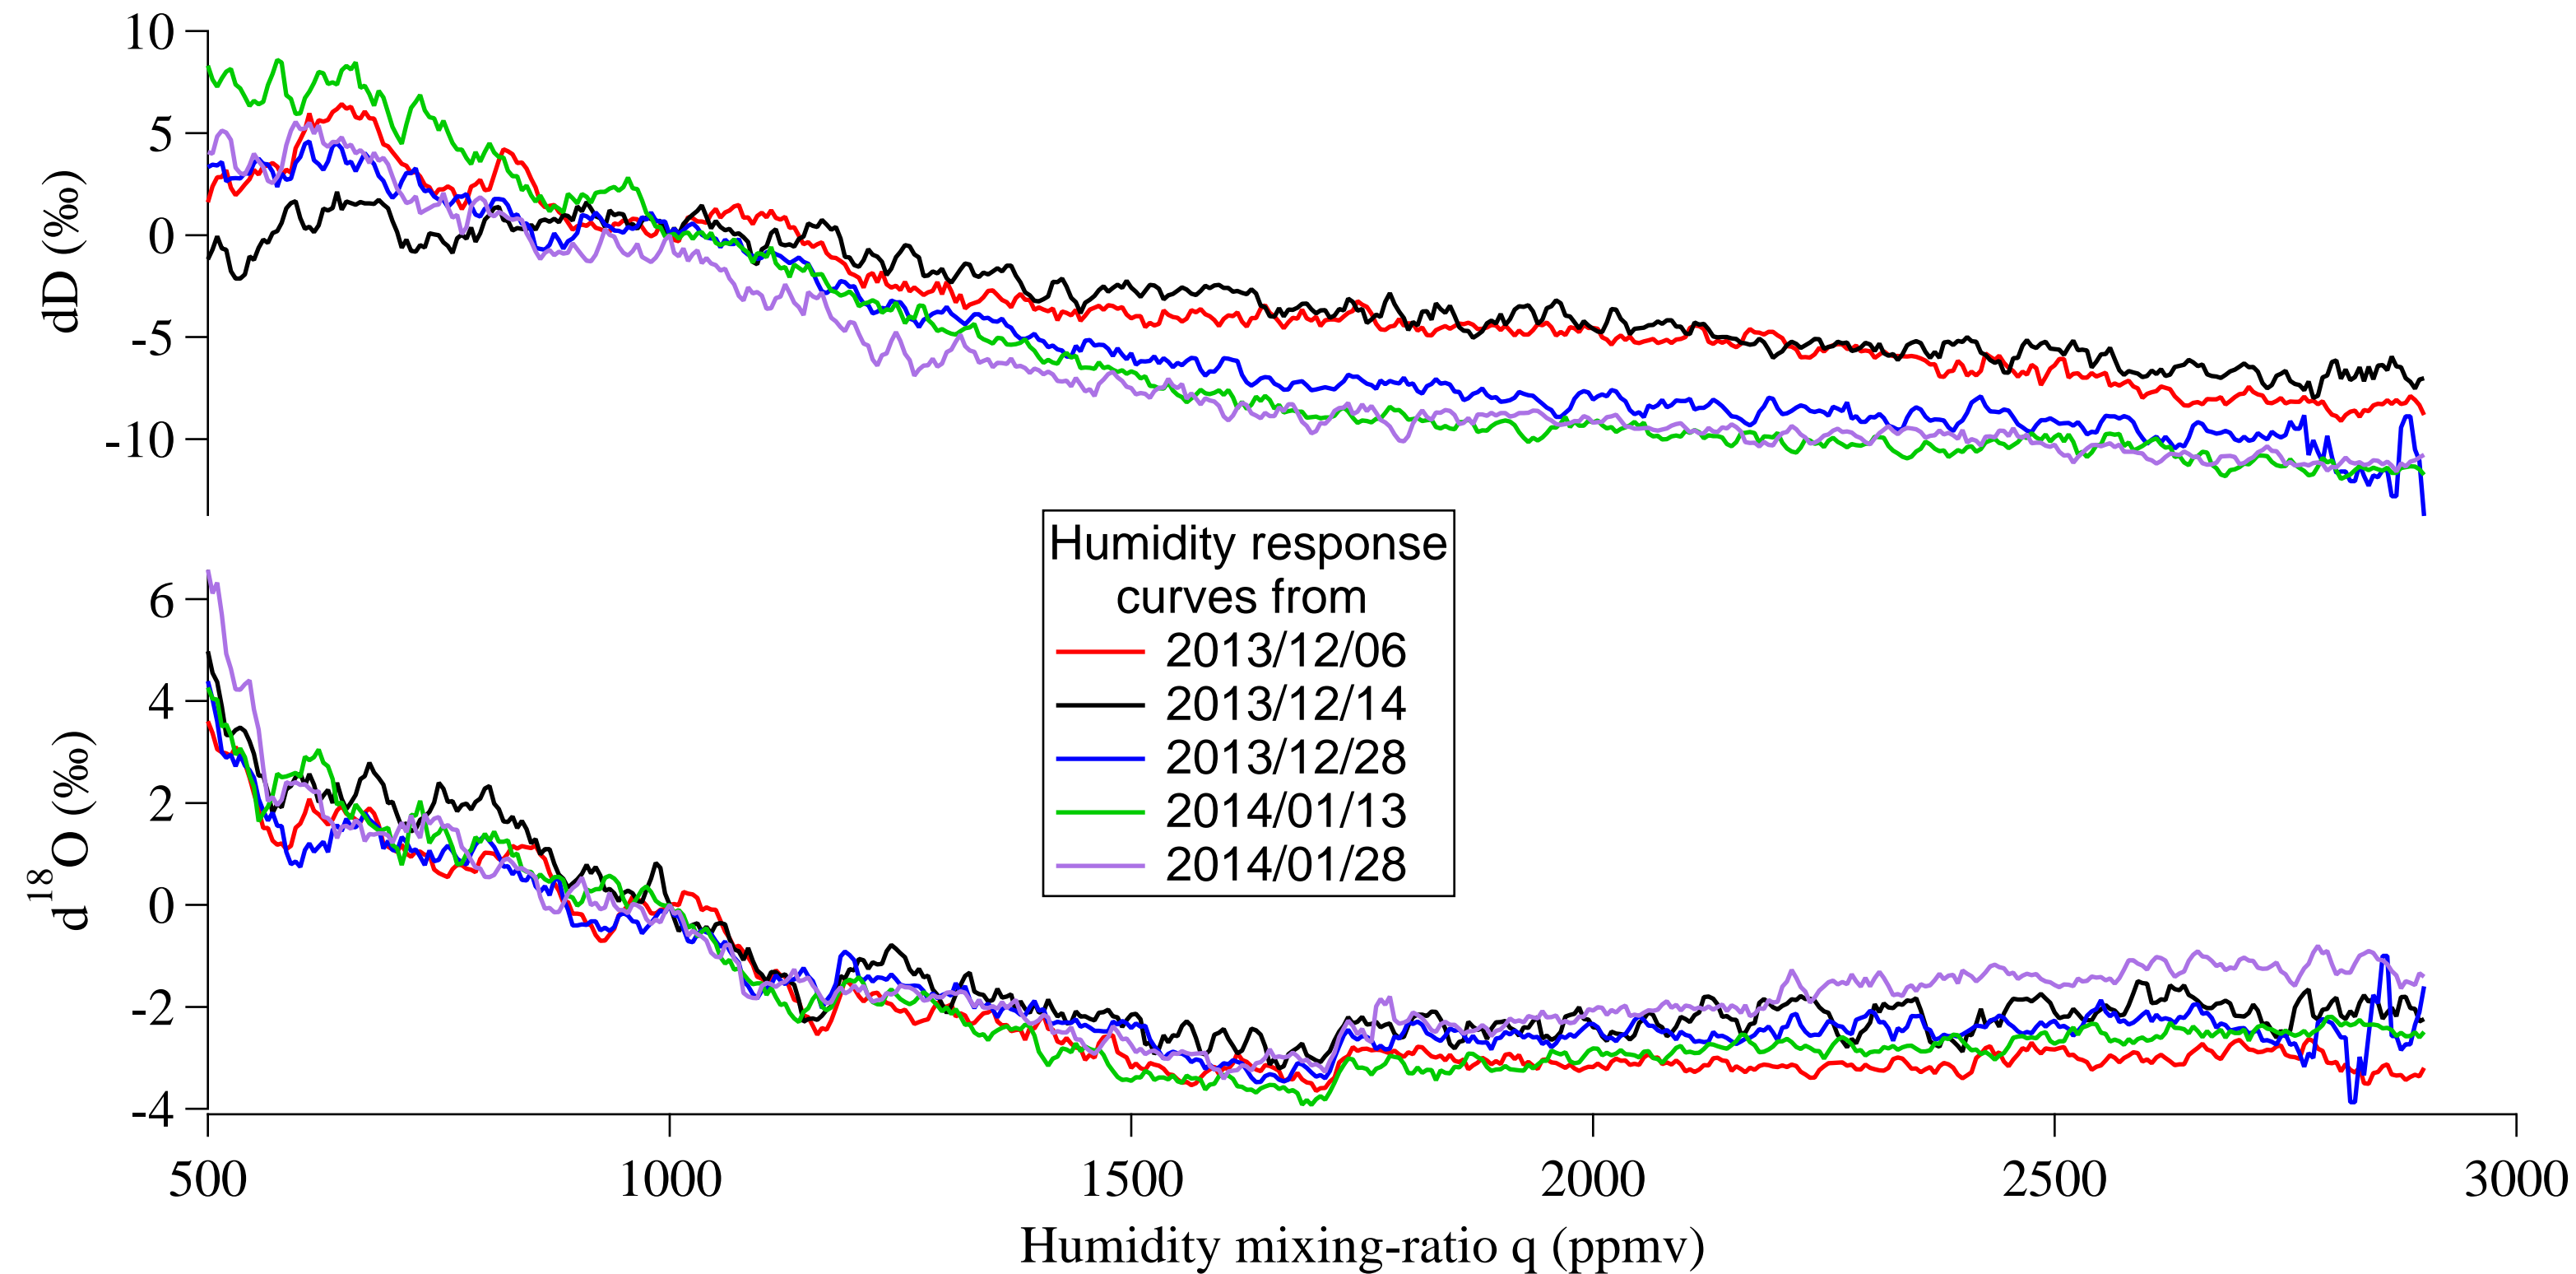

Supplement: Supplementary file 1 [file tc-2016-4-supplement.zip › supplementary_material/FigS2.pdf]

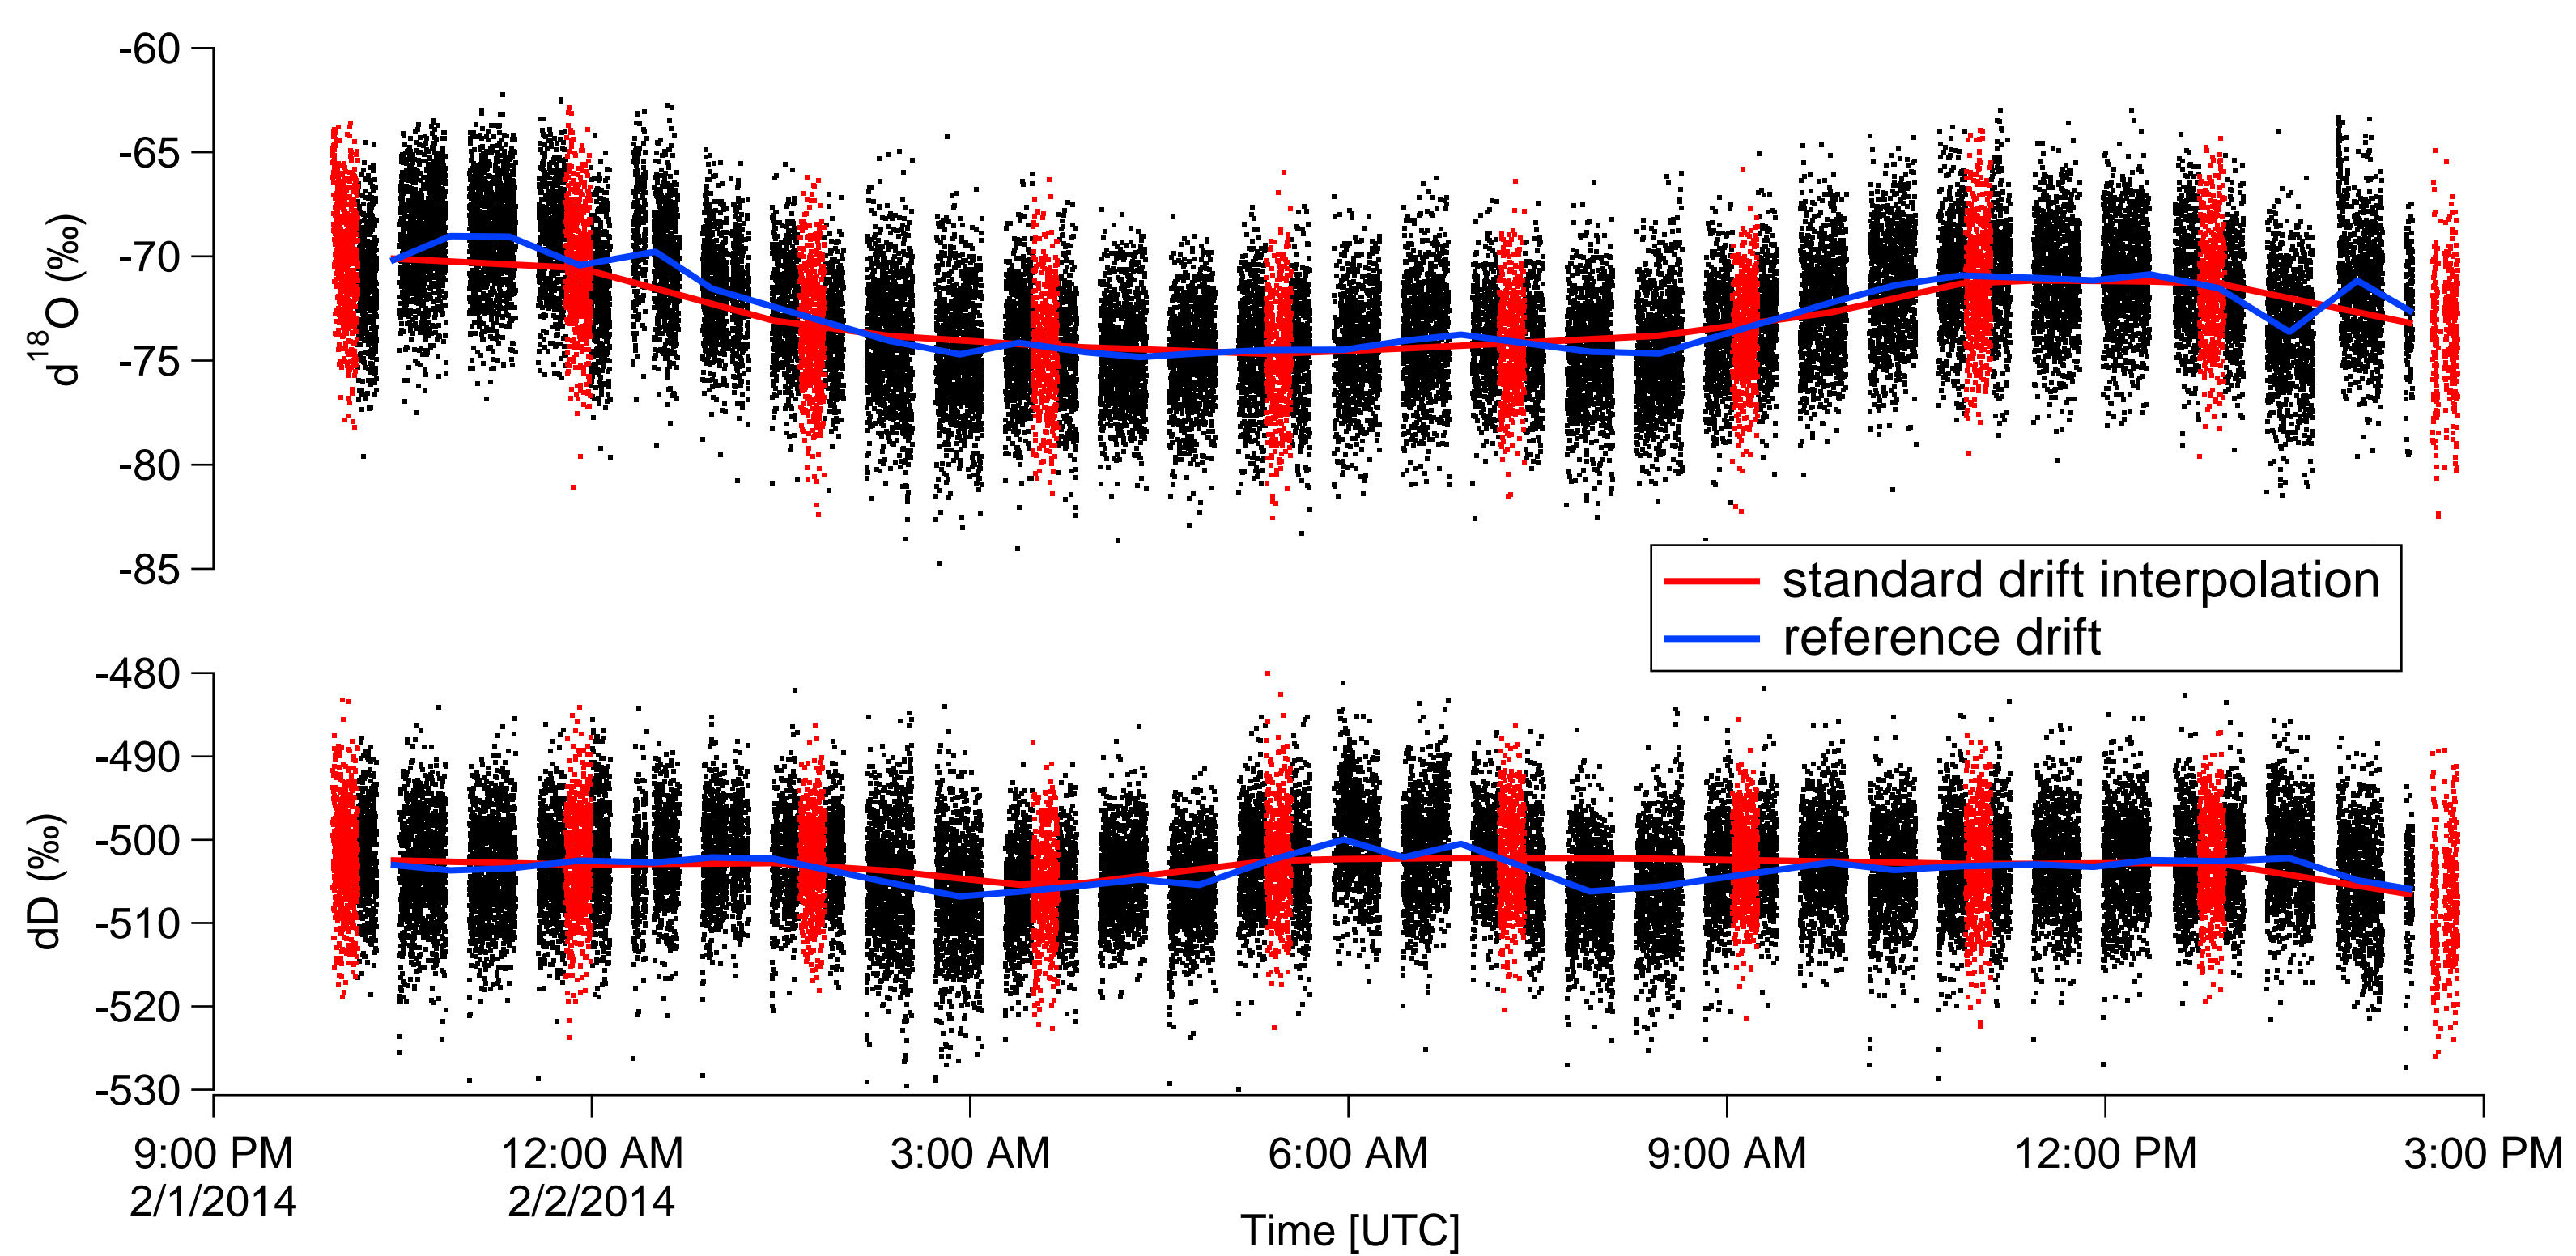

Supplement: Supplementary file 1 [file tc-2016-4-supplement.zip › supplementary_material/FigS3.pdf]
